# Supplementary material
Source: publisher figshare collection journal article supplement (https://tandf.figshare.com/ndownloader/files/13239011)

***Supporting Information for***

**A convenient synthesis of functionalized pyrazolones bearing a highly twisted 1,3-butadiene moiety with skew geometry**

Issa Yavari,*,1 Jamil Sheykhahmadi,1 Hamed Saffarian,1 Nooshin Zahedi,1 Samira Bahemmat,2Mohammad Reza Halvagar2

1 Department of Chemistry, Tarbiat Modares University, PO Box 14115-175, Tehran, Iran

2 Department of Inorganic Chemistry, Chemistry and Chemical Engineering Research Centre of Iran, PO Box 14335-186, Tehran, Iran

Table of contents:

| General Information | S2 |
| --- | --- |
| General Procedure | S2 |
| Spectroscopic and characterization data | S3 |
| 1H NMR and 13C NMR spectra of compounds. | S8 |

1. **General Information**

All purchased solvents and chemicals were of analytical grade and used without further purification. The melting points of the products were determined in open capillary tubes by using *Electrothermal-9100* apparatus. 1H and 13C NMR spectra were recorded on a Bruker *DRX-500 Avance* spectrometer at 500 and 125 MHz, respectively. NMR spectra were obtained in solution of DMSO-*d*6 and CDCl3 using tetramethylsilane (TMS) as internal standard. The abbreviations used for NMR signals: s = singlet, d = doublet, t = triplet, and m = multiplet. FT-IR spectra were recorded on a Shimadzu *IR-460* instrument using the KBr self-supported pellet technique. Mass spectra were obtained on a *Finnigan-MAT-8430EI-MS* apparatus at ionization potential of 70 eV. Elemental analyses for C, H, and N were performed using a *Vario EL III CHNOS-* elemental analyzer.

**2. General Procedure**

A solution of aryl hydrazine **1** (1 mmol), ethyl acetoacetate **2** (1 mmol) in EtOH (5 mL) was warmed to 60 °C for 2-4 h. Then, a mixture of **3** (1 mmol) and **4** (1 mmol) in EtOH (2 mL) was added. The reaction mixture was heated to 60 °C for 8 h. The mixture was cold to 25 °C and extracted with CH2Cl2 (3 x 3 mL); combined organic fractions were dried (MgSO4) and concentrated under reduced pressure. The residue purified by column chromatography [SiO2 (230-400 mesh; Merck); *n*-hexane/AcOEt 4:1] to give product **5**.

**3. Spectroscopic and characterization data**

***Dimethyl 2-[(Z)-(tert-butylamino)(3-methyl-5-oxo-1-phenyl-1,5-dihydro-4H-pyrazol-4- ylidene)methyl]fumarate (5a****)*

Yellow crystals; mp 130-133 °C; yield: 0.34 g (85%); IR (KBr) cm-1: 3447 (N-H), 1726 (C=O, ester), 1611 (C=O, amide), 1214 (C-O); 1H NMR(CDCl3) *δ* (ppm) 1.37 (s*,* 9 H), 1.98 (s*,* 3 H), 3.75 (s*,* 3 H), 3.86 (s*,* 3 H), 7.13 (t*,* *J*= 7.8 Hz, 1 H), 7.25 (s,1 H), 7.37 (t, *J*= 6.6 Hz, 2 H), 7.97 (d, *J*= 8.7, 2 H), 11.93 (br s, 1 H). 13C NMR (CDCl3) *δ* (ppm) 16.4 (Me), 30.3 (C*Me*3), 52.8 (MeO), 53.7 (*C*Me3), 55.8 (MeO), 98.2 (C), 119.3 (2 CH), 124.3 (CH), 128.6 (2 CH), 133.8 (CH), 136.7 (C), 138.9 (C), 145.8 (C), 157.7 (C), 163.2 (C=O), 163.6 (C=O), 165.4 (C=O); EI-MS: *m*/*z* (%) 399 (16, M+), 349 (40), 342 (53), 267 (73), 256 (80), 209 (30), 143 (41), 132 (73), 59 (39), 57 (60). Anal. Calc. for C21H25N3O5 (399.45): C, 63.15; H, 6.31; N, 10.52%. found: C, 62.93; H, 6.30; N, 10.54%.

***Diethyl 2-[(Z)-(tert-butylamino)(3-methyl-5-oxo-1-phenyl-1,5-dihydro-4H-pyrazol-4-ylidene)methyl]fumarate (5b).***

Yellow crystals; mp 143-146 °C; yield: 0.39 g (92%); IR (KBr) cm-1: 3444 (N-H), 1725 (C=O, ester), 1611 (C=O, amide), 1202 (C-O); 1H NMR (CDCl3) *δ* (ppm) 1.19 (t, *J*= 7.1 Hz, 3 H), 1.31 (t, *J*= 7.1 Hz, 3 H), 1.39 (s, 9 H), 2.01 (s, 3 H), 4.19 (m, 2 H), 4.35 (ABq, 2*J*AB = 10.8 Hz, *∆v*AB = 12.2 Hz, 2 H), 7.12 (t, *J*= 7.4 Hz, 1 H), 7.23 (s*,* 1 H), 7.37 (t, *J*= 8.0 Hz, 2 H), 7.97 (d, *J*= 7.7 Hz, 2 H), 11.83 (br s, 1 H). 13C NMR (CDCl3) *δ* (ppm) 13.2 (Me), 13.5 (Me), 15.8 (Me), 30.3 (C*Me*3), 55.3 (*C*Me3), 61.5 (CH2O), 62.6 (CH2O), 97.8 (C), 119.0 (2 CH), 123.7 (CH), 128.6 (2 CH), 133.6 (CH), 136.1 (C), 138.4 (C), 145.4 (C), 157.5 (C), 162.4 (C=O), 162.6 (C=O), 164.9 (C=O); EI-MS: *m*/*z* (%) 427 (18, M+), 370 (42), 295 (68), 256 (100), 209 (41), 171 (42), 132(72), 73 (48), 57 (63). Anal. Calc. for C23H29N3O5 (427.50): C, 64.62; H, 6.84; N, 9.83%. found: C, 64.33; H, 6.82; N, 9.86%.

***Dimethyl 2-[(Z)-(cyclohexylamino)(3-methyl-5-oxo-1-phenyl-1,5-dihydro-4H-pyrazol-4-ylidene)methyl]fumarate*** *(****5c***).

Yellow crystals; mp 137-139 °C; yield: 0.34 g (80%); IR (KBr) cm-1: 3454 (N-H), 1733 (C=O, ester), 1599 (C=O, amide), 1256 (C-O); 1H NMR (CDCl3) *δ* (ppm) 1.29-1.30 (m*,* 2 H), 1.45-1.48 (m,2 H), 1.50-1.58 (m, 2 H), 1.79 (m, 2 H), 1.87-1.89 (m, 2 H), 2.03 (s*,* 3 H), 3.25 (brs, 1 H), 3.75 (s*,* 3 H), 3.88 (s, 3 H), 7.12 (t, *J*= 6.3 Hz, 1 H), 7.27 (s, 1 H), 7.39 (t, *J*= 6.9 Hz, 2 H), 7.98 (d, *J*= 7.6 Hz, 2 H), 11.44 (br s, 1 H). 13C NMR (CDCl3) *δ* (ppm) 15.9 (Me), 24.0 (CH2), 24.1 (CH2), 25.0 (CH2), 33.0 (CH2), 33.1 (CH2), 52.8 (MeO), 53.7 (MeO), 54.4 (CH-N), 97.5 (C), 119.1 (2 CH), 124.2 (CH), 128.6 (2 CH), 134.0 (CH), 134.8 (C), 138.9 (C), 145.8 (C), 156.7 (C), 163.1 (C=O), 163.2 (C=O), 165.7 (C=O). EI-MS: *m*/*z* (%) 425 (18, M+), 366 (40), 342 (80), 282 (100), 209 (30), 187 (40), 138 (70), 83 (38), 59 (22). Anal. Calc. for C23H27N3O5 (425.49): C, 64.93; H, 6.40; N, 9.88%. found: C, 64.91; H, 6.41; N, 9.91%.

***Diethyl 2-[(Z)-(cyclohexylamino)(3-methyl-5-oxo-1-phenyl-1,5-dihydro-4H-pyrazol-4-ylidene)methyl]fumarate (5d****)*.

Yellow crystals; mp 129-132 °C; yield: 0.38 g (83%); IR (KBr) cm-1: 3439 (N-H), 1725 (C=O, ester), 1599 (C=O, amide), 1247 (C-O); 1H NMR (CDCl3) *δ* (ppm) 1.19 (t, *J*= 7.1 Hz, 3 H), 1.25 (t, *J*= 7.1 Hz, 3 H), 1.29-1.33 (m, 2 H), 1.46-1.47 (m, 2 H), 1.48-1.50 (m*,* 2 H), 1.79-1.83 (m, 2 H), 1.87-1.89 (m, 2 H), 2.05 (s, 3 H), 3.26 (br s, 1 H), 4.17 [(AB)X3*,* 2*J*AB = 12.5 Hz, 3*J*AX = 7.1 Hz, 3*J*BX = 7.1 Hz, *∆v*AB = 30.8 Hz, 2 H], 4.38 [(AB)X3, 2*J*AB = 14.2 Hz, 3*J*AX = 7.1 Hz, 3*J*BX = 7.1 Hz, *∆v*AB = 49.0 Hz, 2 H], 7.12 (t, 3*J*= 7.3 Hz, 1 H), 7.26 (s, 1 H), 7.37 (t, 3*J*= 7.5 Hz, 2 H), 7.98 (d, *J*= 7.6 Hz, 2 H), 11.48 (br s, 1 H). 13C NMR(CDCl3) *δ* (ppm) 13.7 (Me), 14.0 (Me), 15.9 (Me), 24.0 (CH2), 24.1 (CH2), 25.0 (CH2), 25.1 (CH2), 33.1 (CH2), 54.3 (N-CH), 62.1 (CH2O), 63.1 (CH2O), 97.7 (C), 119.1 (2 CH), 124.2 (CH), 128.6 (2 CH), 134.3 (CH), 134.8 (C), 138.9 (C), 145.9 (C), 157.0 (C), 162.6 (C=O), 162.9 (C=O), 165.7 (C=O). EI-MS: *m*/*z* (%) 453 (15, M+), 380 (40), 321 (80), 242 (100), 211 (31), 171 (40), 122 (70), 83(39), 73 (23). Anal. Calc. for C25H31N3O5 (453.54): C, 66.21; H, 6.89; N, 9.27%. found: C, 66.43; H, 6.91; N, 9.29%.

***Dimethyl 2-[(Z)-(tert-butylamino)(3-(2-methoxy-2-oxoethyl)-5-oxo-1-phenyl-1,5-dihydro-4H-pyrazol-4-ylidene)methyl]fumarate (5e).***

Yellow crystals; mp 142-145 °C; yield: 0.39 g (86%); IR (KBr) cm-1: 3451 (N-H), 1734 (C=O, ester), 1609 (C=O, amide), 1217 (C-O); 1H NMR (CDCl3) *δ* (ppm) 1.38 (s, 9 H), 3.44 (ABq, 2JAB = 16.8 Hz, ∆vAB = 29.4 Hz 2 H), 3.64 (s, 3 H) 3.70 (s, 3 H), 3.83 (s, 3 H), 7.13 (t, 3J= 7.4 Hz, 1 H), 7.23 (s, 1 H), 7.37 (t, 3J= 8.0 Hz, 2 H), 7.97 (d, 3J= 7.7 Hz, 2 H), 12.12 (br s, 1 H). 13C NMR (CDCl3) *δ* (ppm) 30.3 (CMe3), 35.7 (CH2), 52.1 (MeO), 53.0 (MeO), 53.6 (MeO), 56.2 (CMe3), 97.6 (C), 119.6 (2 CH), 121.8 (CH), 128.6 (2 CH), 134.2 (CH), 136.1 (C), 137.8 (C), 141.9 (C), 157.7 (C), 163.1 (C=O), 163.4 (C=O), 168.7 (C=O), 170.5 (C=O). EI-MS: *m*/*z* (%) 457 (20, M+), 400 (50), 398 (48), 386 (75), 314 (100), 267 (47), 143 (35), 120 (41), 73 (29), 59 (61). Anal. Calc. for C23H27N3O7 (457.48): C, 60.39; H, 5.95; N, 9.19%. found: C, 60.55; H, 5.93; N, 9.22%.

**Diethyl 2-[(*Z*)-(*tert*-butylamino)(3-(2-methoxy-2-oxoethyl)-5-oxo-1-phenyl-1,5-dihydro-4*H*-pyrazol-4-ylidene)methyl]fumarate (5f).**

Yellow crystals; mp 135-138 °C; yield: 0.37 g (76%). IR (KBr) cm-1: 3442 (N-H), 1729 (C=O, ester), 1613 (C=O, amide), 1212 (C-O); 1H NMR (CDCl3) *δ* (ppm) 1.20 (t, 3*J*= 7.1 Hz, 3 H), 1.31 (t, 3*J*= 7.1 Hz, 3 H), 1.39 (s, 9 H), 3.40 (ABq,2*J*= 16.2 Hz , *∆v*AB *=* 49.1 Hz, 2 H), 3.63 (s, 3 H), 4.20 [(AB)X3, 2*J*AB = 10.9 Hz, 3*J*AX = 7.0 Hz, 3*J*BX = 7.1 Hz, *∆v*AB = 22.4 Hz, 2 H] 4.35 [(AB)X3, 2*J*AB = 11.8 Hz, 3*J*AX = 7.0 Hz, 3*J*BX = 7.1 Hz, *∆v*AB = 22.5 Hz, 2 H], 7.14 (t, 3*J*= 7.4 Hz, 1 H), 7.19 (s, 1 H), 7.37 (t, 3*J*= 7.5 Hz, 2 H), 7.97 (d, 3*J*= 7.4 Hz, 2 H), 12.13 (br s, 1H). 13C NMR (CDCl3) *δ* (ppm) 13.7 (Me), 13.9 (Me), 30.9 (C*Me3*), 35.7 (CH2), 52.2 (MeO), 56.1 (*C*Me3), 62.1 (CH2O), 63.2 (CH2O), 97.9 (C), 119.6 (2 CH), 124.5 (CH), 128.7 (2 CH), 134.5 (CH), 136.0 (C), 138.8 (C), 142.9 (C), 158.0 (C), 162.8 (C=O), 163.0 (C=O), 165.4 (C=O), 170.5 (C=O). EI-MS: *m*/*z* (%) 485 (21, M+), 428 (5), 412 (12), 314 (30), 295 (20), 73 (22), 57 (59). Anal. Calc. for C25H31N3O7 (485.54): C, 61.84; H, 6.44; N, 8.65%. found: C, 62.02; H, 6.45; N, 8.67%.

**Dimethyl 2-[(*Z*)-(cyclohexylamino)(3-(2-methoxy-2-oxoethyl)-5-oxo-1-phenyl-1,5-dihydro-4*H*-pyrazol-4-ylidene)methyl]fumarate (5g).**

Yellow crystals; mp 148-151 °C; yield: 0.39 g (81%). IR (KBr) cm-1: 3409 (N-H), 1736 (C=O, ester), 1599 (C=O, amide), 1256 (C-O); 1H NMR (CDCl3) *δ* (ppm) 1.27-1.30 (m*,* 2 H), 1.37-1.48 (m, 2 H), 1.50-1.53 (m*,* 2 H), 1.70-1.71 (m, 2 H), 1.83-1.89 (m, 2 H), 3.27 (br s, 1 H), 3.48 (ABq, 2*J*AB = 16.4 Hz, *∆vAB* *=* 21.9 Hz, 2 H), 3.62 (s, 3 H), 3.76 (s, 3 H), 3.88 (s, 3 H), 7.14 (t*,* *3J*= 7.5 Hz, 1 H), 7.25 (s, 1 H), 7.39 (t, 3*J*= 7.4 Hz, 2 H), 7.98 (d, 3*J*= 7.6 Hz, 2 H), 11.83 (br s, 1H). 13C NMR (CDCl3) *δ* (ppm) 24.0 (CH2), 24.2 (CH2), 24.7 (CH2), 25.0 (CH2), 33.1 (CH2), 37.0 (CH2), 52.1 (MeO), 52.2 (MeO), 53.7 (MeO), 54.6 (CH-N), 97.0 (C), 119.4 (2 CH), 124.4 (CH), 128.6 (2 CH), 134.3 (CH), 134.5 (C), 138.8 (C), 141.9 (C), 156.7 (C), 162.9 (C=O), 163.2 (C=O), 165.8 (C=O), 170.2 (C=O). EI-MS: *m*/*z* (%) 483 (22, M+), 424 (50), 410 (37), 400 (75), 340 (100), 193 (47), 143 (35), 83 (40), 73 (32), 59 (63). Anal. Calcd. for C23H27N3O5 (483.52): C, 62.10; H, 6.05; N, 8.69%. found: C, 62.28; H, 6.06; N, 8.72%.

***Diethyl 2-[(Z)-(cyclohexylamino)(3-(2-methoxy-2-oxoethyl)-5-oxo-1-phenyl-1,5-dihydro-4H-pyrazol-4-ylidene)methyl]fumarate (5h).***

Yellow crystals; mp 136-138 °C; yield: 0.40 g (78%). IR (KBr) cm-1: 3454 (N-H), 1731 (C=O, ester), 1627 (C=O, amide), 1246 (C-O); 1H NMR (CDCl3) *δ* (ppm) 1.20 (t, 3*J*= 7.1 Hz, 3 H), 1.26 (t, 3*J*= 7.1 Hz, 3 H), 1.29-1.31 (m, 2 H), 1.48 (m, 2 H), 1.50-1.52 (m, 2 H), 1.80 (m, 2 H), 1.88 (m, 2 H), 3.27 (br s, 1 H), 3.54 (s, 3 H), 3.65 (m, 2 H), 4.19 [(AB)X3*,* 2*J*AB = 10.6 Hz, 3*J*AX = 7.1 Hz, 3*J*BX = 7.1 Hz, *∆v*AB = 21.5 Hz, 2 H], 4.36 [(AB)X3, 2*J*AB = 10.9 Hz, 3*J*AX = 7.1 Hz, 3*J*BX = 7.1 Hz, *∆v*AB = 50.1 Hz, 2 H], 7.14 (t, 3*J*= 7.1 Hz, 1 H), 7.23 (s, 1 H), 7.38 (t, 3*J*= 7.8 Hz, 2 H), 7.98 (d, 3*J*= 7.8 Hz, 2 H), 11.47 (br s, 1 H). 13C NMR (CDCl3) *δ* (ppm) 13.7 (Me), 14.0 (Me), 23.9 (CH2), 25.0 (CH2), 32.8(CH2), 33.1 (CH2), 35.0 (CH2), 37.3 (CH2), 52.16 (MeO), 54.3 (CH-N), 62.2 (CH2O), 63.2 (CH2O), 97.1 (C), 119.2 (2 CH), 124.7 (CH), 128.7 (2 CH), 134.4 (CH), 134.7 (C), 138.5 (C), 142.2 (C), 157.5 (C), 162.3 (C=O), 162.8 (C=O), 165.4 (C=O), 169.9 (C=O). EI-MS: *m*/*z* (%) 511 (22, M+), 438 (51), 428 (37), 340 (73), 321 (100), 190 (47), 171 (39), 83 (41), 73 (33), 59 (63). Anal. Calcd. for C27H33N3O7 (511.58): C, 63.39; H, 6.50; N, 8.21%. found: C, 63.17; H, 6.52; N, 8.24%.

***Dimethyl 2-[(Z)-(tert-butylamino)(3-methyl-1-(4-nitrophenyl)-5-oxo-1,5-dihydro-4H-pyrazol-4-ylidene)methyl]fumarate (5i).***

Yellow crystals; mp 143-146 °C; yield: 0.32 g (71%). IR (KBr) cm-1: 3441 (N-H), 1722 (C=O, ester), 1614 (C=O, amide), 1219 (C-O); 1H NMR (CDCl3) *δ* (ppm) 1.43 (s, 9 H), 2.01 (s, 3 H), 3.80 (s, 3 H), 3.93 (s, 3 H), 7.30 (s, 1 H), 8.26 (d, 3*J*= 7.4 Hz, 2 H), 8.31 (d, 3*J*= 7.4 Hz, 2 H), 11.67 (br s, 1 H). 13C NMR (CDCl3) *δ* (ppm) 16.6 (Me), 30.3 (C*Me*3), 52.9 (MeO), 53.8 (*C*Me3), 56.1 (MeO), 98.3 (C), 117.7 (2 CH), 124.7 (2 CH), 134.0 (CH), 136.6 (C), 143.2 (C), 144.3 (C), 147.7 (C), 158.4 (C), 163.1 (C=O), 163.4 (C=O), 166.3 (C=O). EI-MS: *m*/*z* (%) 444 (16, M+), 349 (40), 342 (53), 267 (73), 256 (80), 209 (30), 143 (41), 132 (73), 59 (39), 57 (60). Anal. Calc. for C21H24N4O7 (444.16): C, 56.75; H, 5.44; N, 12.61%. found: C, 56.61; H, 5.45; N, 12.63%.

***Diethyl 2-[(Z)-(tert-butylamino)(3-methyl-1-(4-nitrophenyl)-5-oxo-1,5-dihydro-4H-pyrazol-4-ylidene)methyl]fumarate (5j).***

Yellow crystals; mp 151-153 °C; yield: 0.32 g (67%). IR (KBr) cm-1: 3444 (N-H), 1725 (C=O, ester), 1611 (C=O, amide), 1202 (C-O); 1H NMR (CDCl3) *δ* (ppm) 1.23 (t, 3*J*= 7.1 Hz, 3 H), 1.33 (t, 3*J*= 7.1 Hz, 3 H), 1.43 (s, 9 H), 2.03 (s, 3 H), 4.23 (m, 2 H), 4.40 (ABq, 2*J*AB = 7.1 Hz, *∆vAB* *=* 12.3 Hz, 2 H), 7.29 (s, 1 H), 8.27 (d, 3*J*= 9.3 Hz, 2 H), 8.31 (d, *3J*= 9.3 Hz, 2 H), 11.68 (br s, 1 H). 13C NMR (CDCl3) *δ* (ppm) 13.8 (Me), 14.3 (Me), 16.5 (Me), 30.3 (C*Me*3), 52.9 (*C*Me3), 56.2 (CH2O), 63.3 (CH2O), 98.8 (C), 117.7 (2 CH), 123.7 (CH), 128.6 (2 CH), 133.6 (CH), 136.1 (C), 138.4 (C), 145.4 (C), 157.5 (C), 162.4 (C=O), 162.6 (C=O), 164.9 (C=O). EI-MS: *m*/*z* (%) 474 (18, M+), 370 (42), 295 (68), 256 (100), 209 (41), 171 (42), 132 (72), 73 (48), 57 (63). Anal. Calc. for C23H29N3O5 (474.50): C, 64.62; H, 6.84; N, 9.83%. found: C, 64.83; H, 6.82; N, 9.86%.

***Dimethyl 2-[(Z)-(cyclohexylamino)(3-methyl-1-(4-nitrophenyl)-5-oxo-1,5-dihydro-4H-pyrazol-4-ylidene)methyl]fumarate (5k).***

Yellow crystals; mp 141-143 °C; yield: 0.33 g (70%). IR (KBr) cm-1: 3448 (N-H), 1733 (C=O, ester), 1598 (C=O, amide), 1255 (C-O); 1H NMR (CDCl3) *δ* (ppm) 1.26-1.30 (m, 2 H), 1.34-1.48 (m, 2 H), 1.50-1.53 (m, 2 H), 1.61 (m, 2 H), 1.83-1.89 (m, 2H), 2.03 (s, 3 H), 3.25 (br s, 1 H), 3.78 (s, 3 H), 3.91 (s, 3 H) 7.31 (s, 1 H), 8.26 (d, 3*J*= 9.4 Hz, 2 H), 8.29 (d, 3*J*= 9.4 Hz, 2 H), 11.28 (br s, 1 H). 13C NMR (CDCl3) *δ* (ppm) 16.2 (Me), 24.0 (2 CH2), 24.9 (CH2), 33.0 (CH2), 33.1 (CH2), 52.9 (MeO), 53.9 (MeO), 54.6 (CH-N), 97.2 (C), 117.6 (2 CH), 124.7 (2 CH), 125.1 (C), 134.0 (CH), 134.8 (C), 143.2 (C), 144.3 (C), 147.8 (C), 157.3 (C), 162.9 (C=O), 163.1 (C=O), 166.7 (C=O). EI-MS: *m*/*z* (%) 470 (21, M+), 366 (40), 342 (80), 282 (100), 209 (30), 187 (40), 138 (70), 83 (38), 59 (22). Anal. Calc. for C23H26N4O7 (470.18): C, 58.72; H, 5.57; N, 11.91%. Found: C, 58.49; H, 5.58; N, 11.95%.

***Diethyl 2-[(Z)-(cyclohexylamino)(3-methyl-1-(4-nitrophenyl)-5-oxo-1,5-dihydro-4H-pyrazol-4-ylidene)methyl]fumarate (5l).***

Yellow crystals; mp 148-150 °C; yield: 0.37 g (75%). IR (KBr) cm-1: 3444 (N-H), 1727 (C=O, ester), 1597 (C=O, amide), 1223 (C-O); 1H NMR (CDCl3) *δ* (ppm) 1.23 (t, 3*J*= 7.1 Hz, 3 H), 1.29-1.33 (m, 2 H), 1.34 (t, 3*J*= 7.1 Hz, 3 H), 1.36 (m, 2 H), 1.51 (m, 2 H), 1.62 (m, 2 H), 1.82 (m, 2 H), 2.05 (s, 3 H), 3.26 (br s, 1 H), 4.21 (m, 2 H), 4.37 [(AB)X3, 2*J*AB = 10.8 Hz, 3*J*AX= 7.1 Hz, 3*J*BX = 7.1 Hz, *∆v*AB = 30.2 Hz, 2 H], 7.26 (s, 1 H), 8.26 (d, 3*J*= 7.5 Hz, 2H), 8.33 (d, 3*J*= 7.4 Hz, 2 H), 11.27 (br s, 1 H). 13C NMR (CDCl3) *δ* (ppm) 13.8 (Me), 14.0 (Me), 16.1 (Me), 24.0 (CH2), 24.9 (2 CH2), 33.0 (2 CH2), 54.6 (CH-N), 62.2 (CH2O), 63.3 (CH2O), 97.4 (C), 117.6 (2 CH), 124.8 (2 CH), 134.4 (CH), 134.7 (C), 143.2 (C), 144.3 (C), 147.9 (C), 157.6 (C), 162.4 (C=O), 162.8 (C=O), 166.6 (C=O). EI-MS: *m*/*z* (%) 498 (15, M+), 380 (40), 321 (80), 242 (100), 211 (31), 171 (40), 122 (70), 83 (39), 73 (23). Anal. Calc. (%) for C25H30N4O7(498.54): C, 60.23; H, 6.07; N, 11.24%. Found: C, 60.45; H, 6.05; N, 11.28%.

Dimethyl 2-((Z)-(*tert*-butylamino)(3-methyl-5-oxo-1-phenyl-1,5-dihydro-4H-pyrazol-4-ylidene)methyl)fumarate (**5a**):


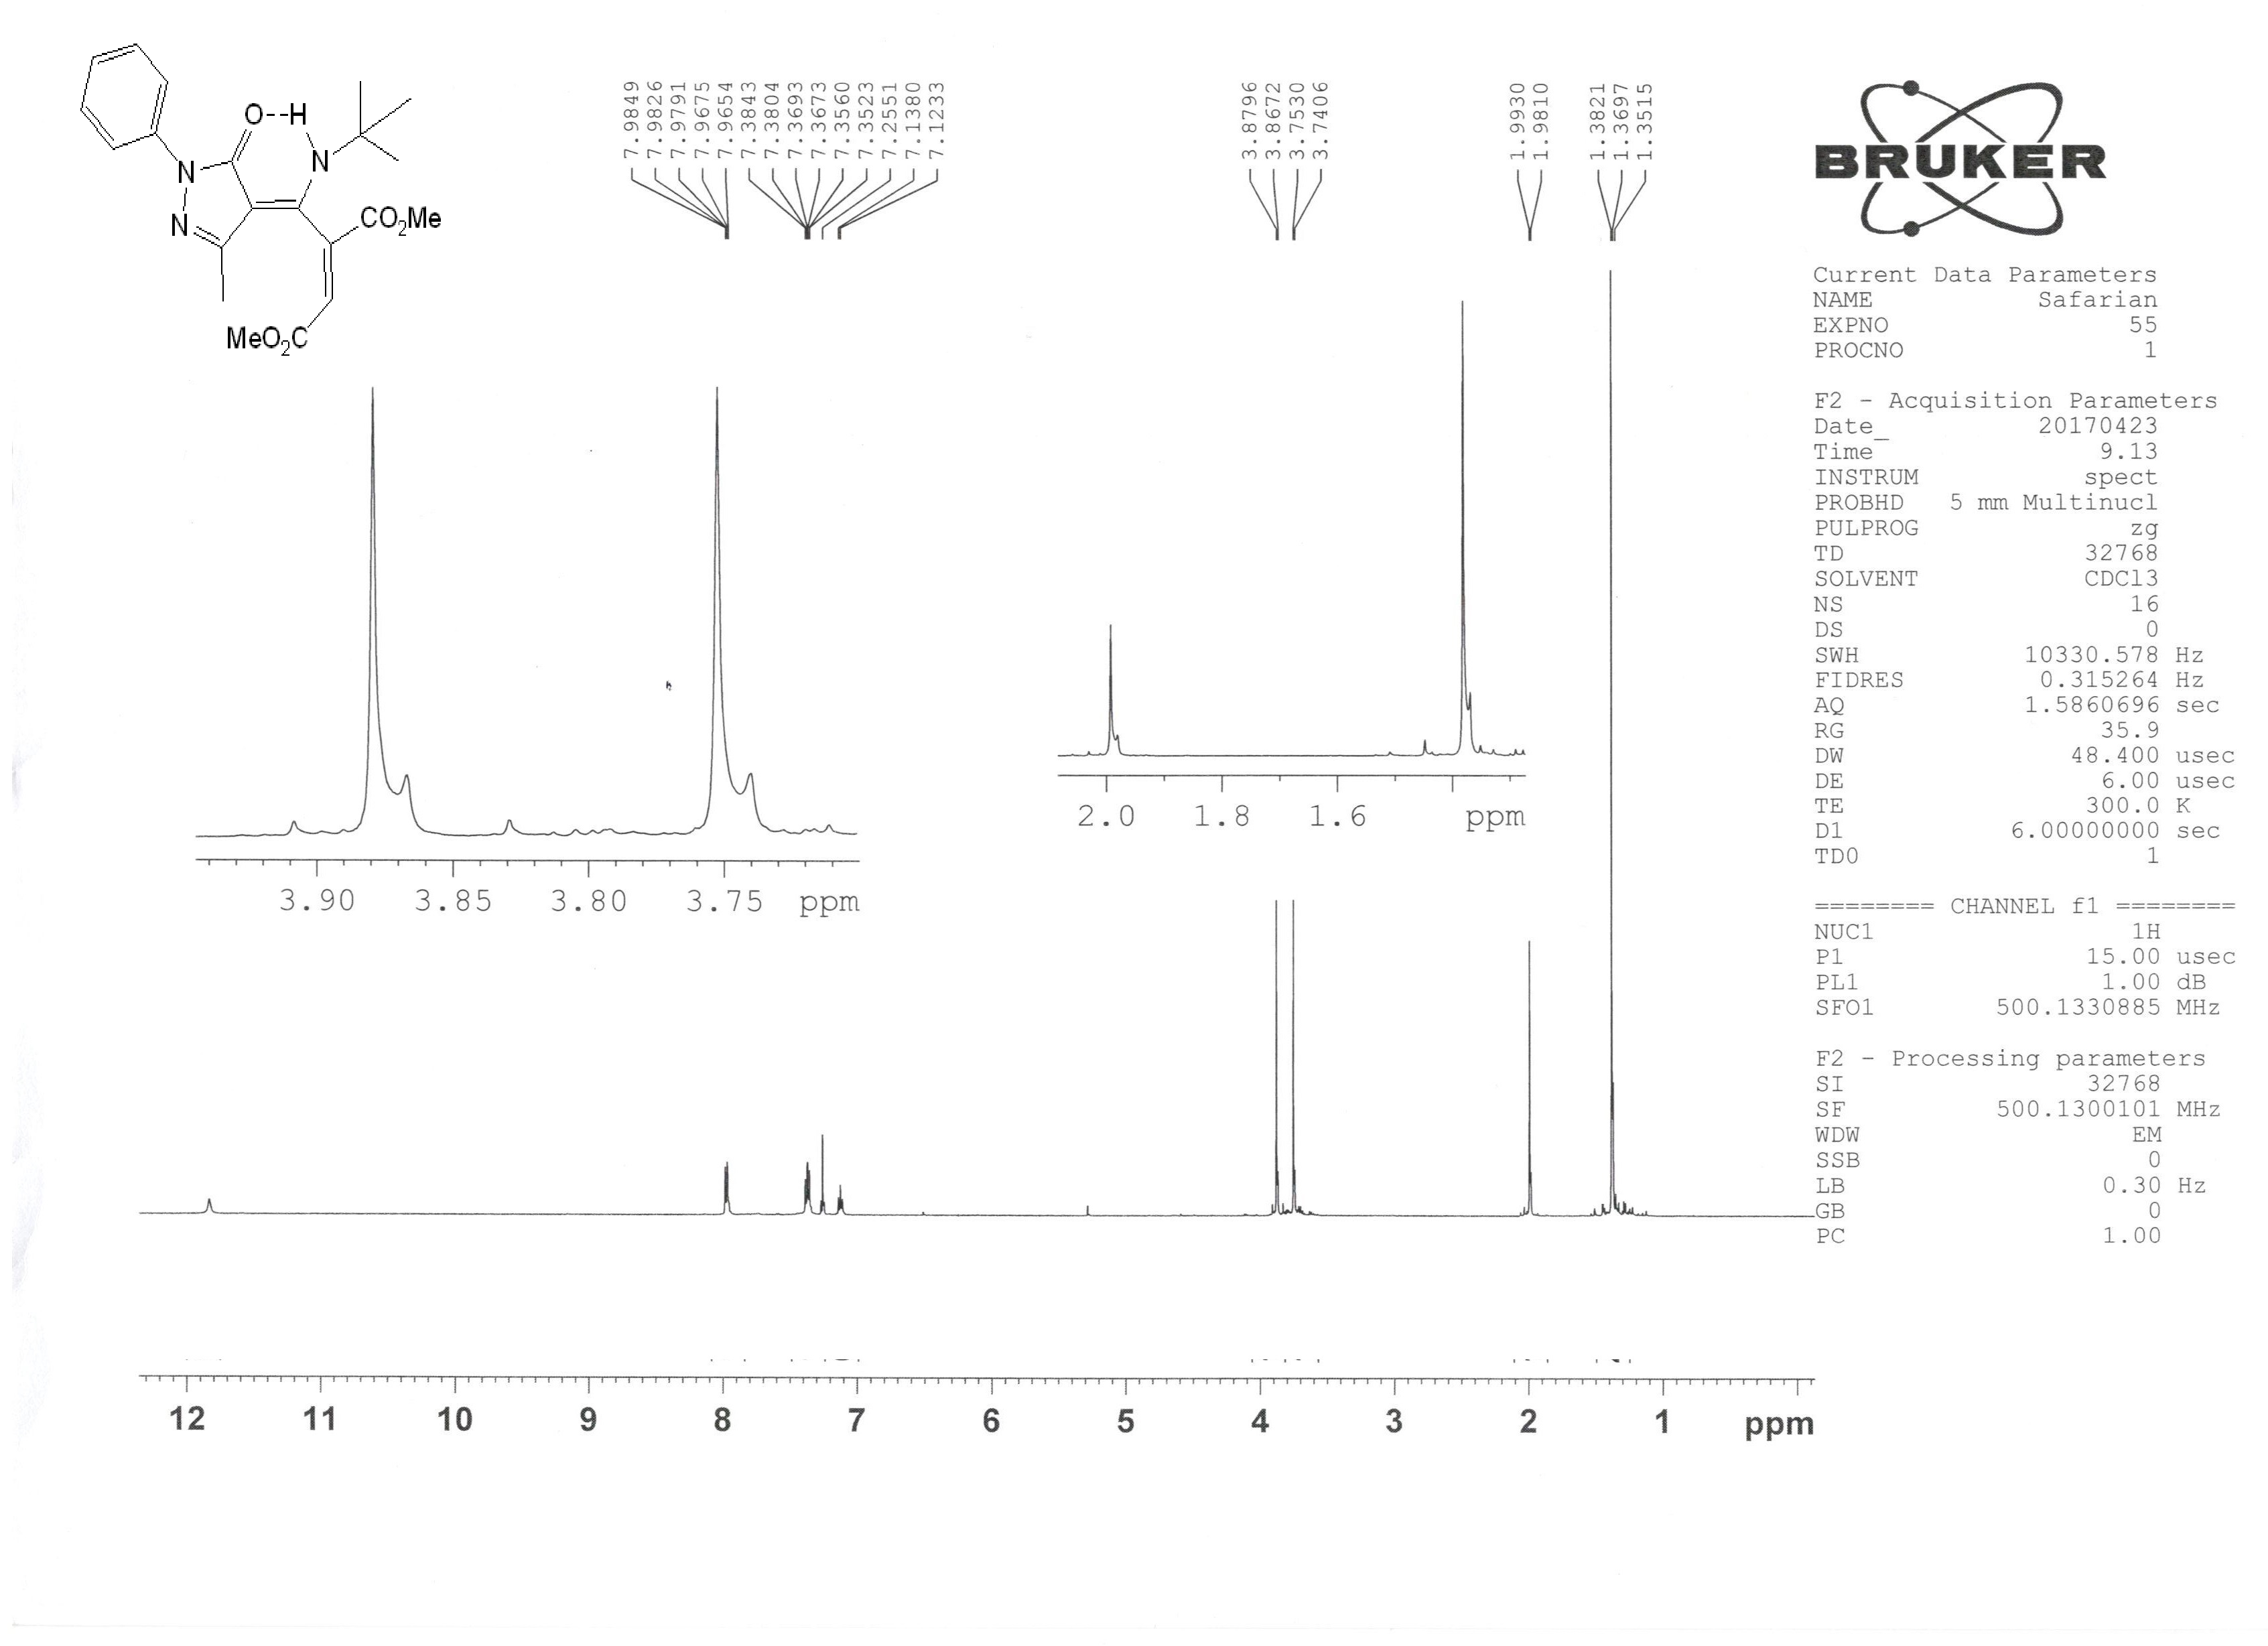

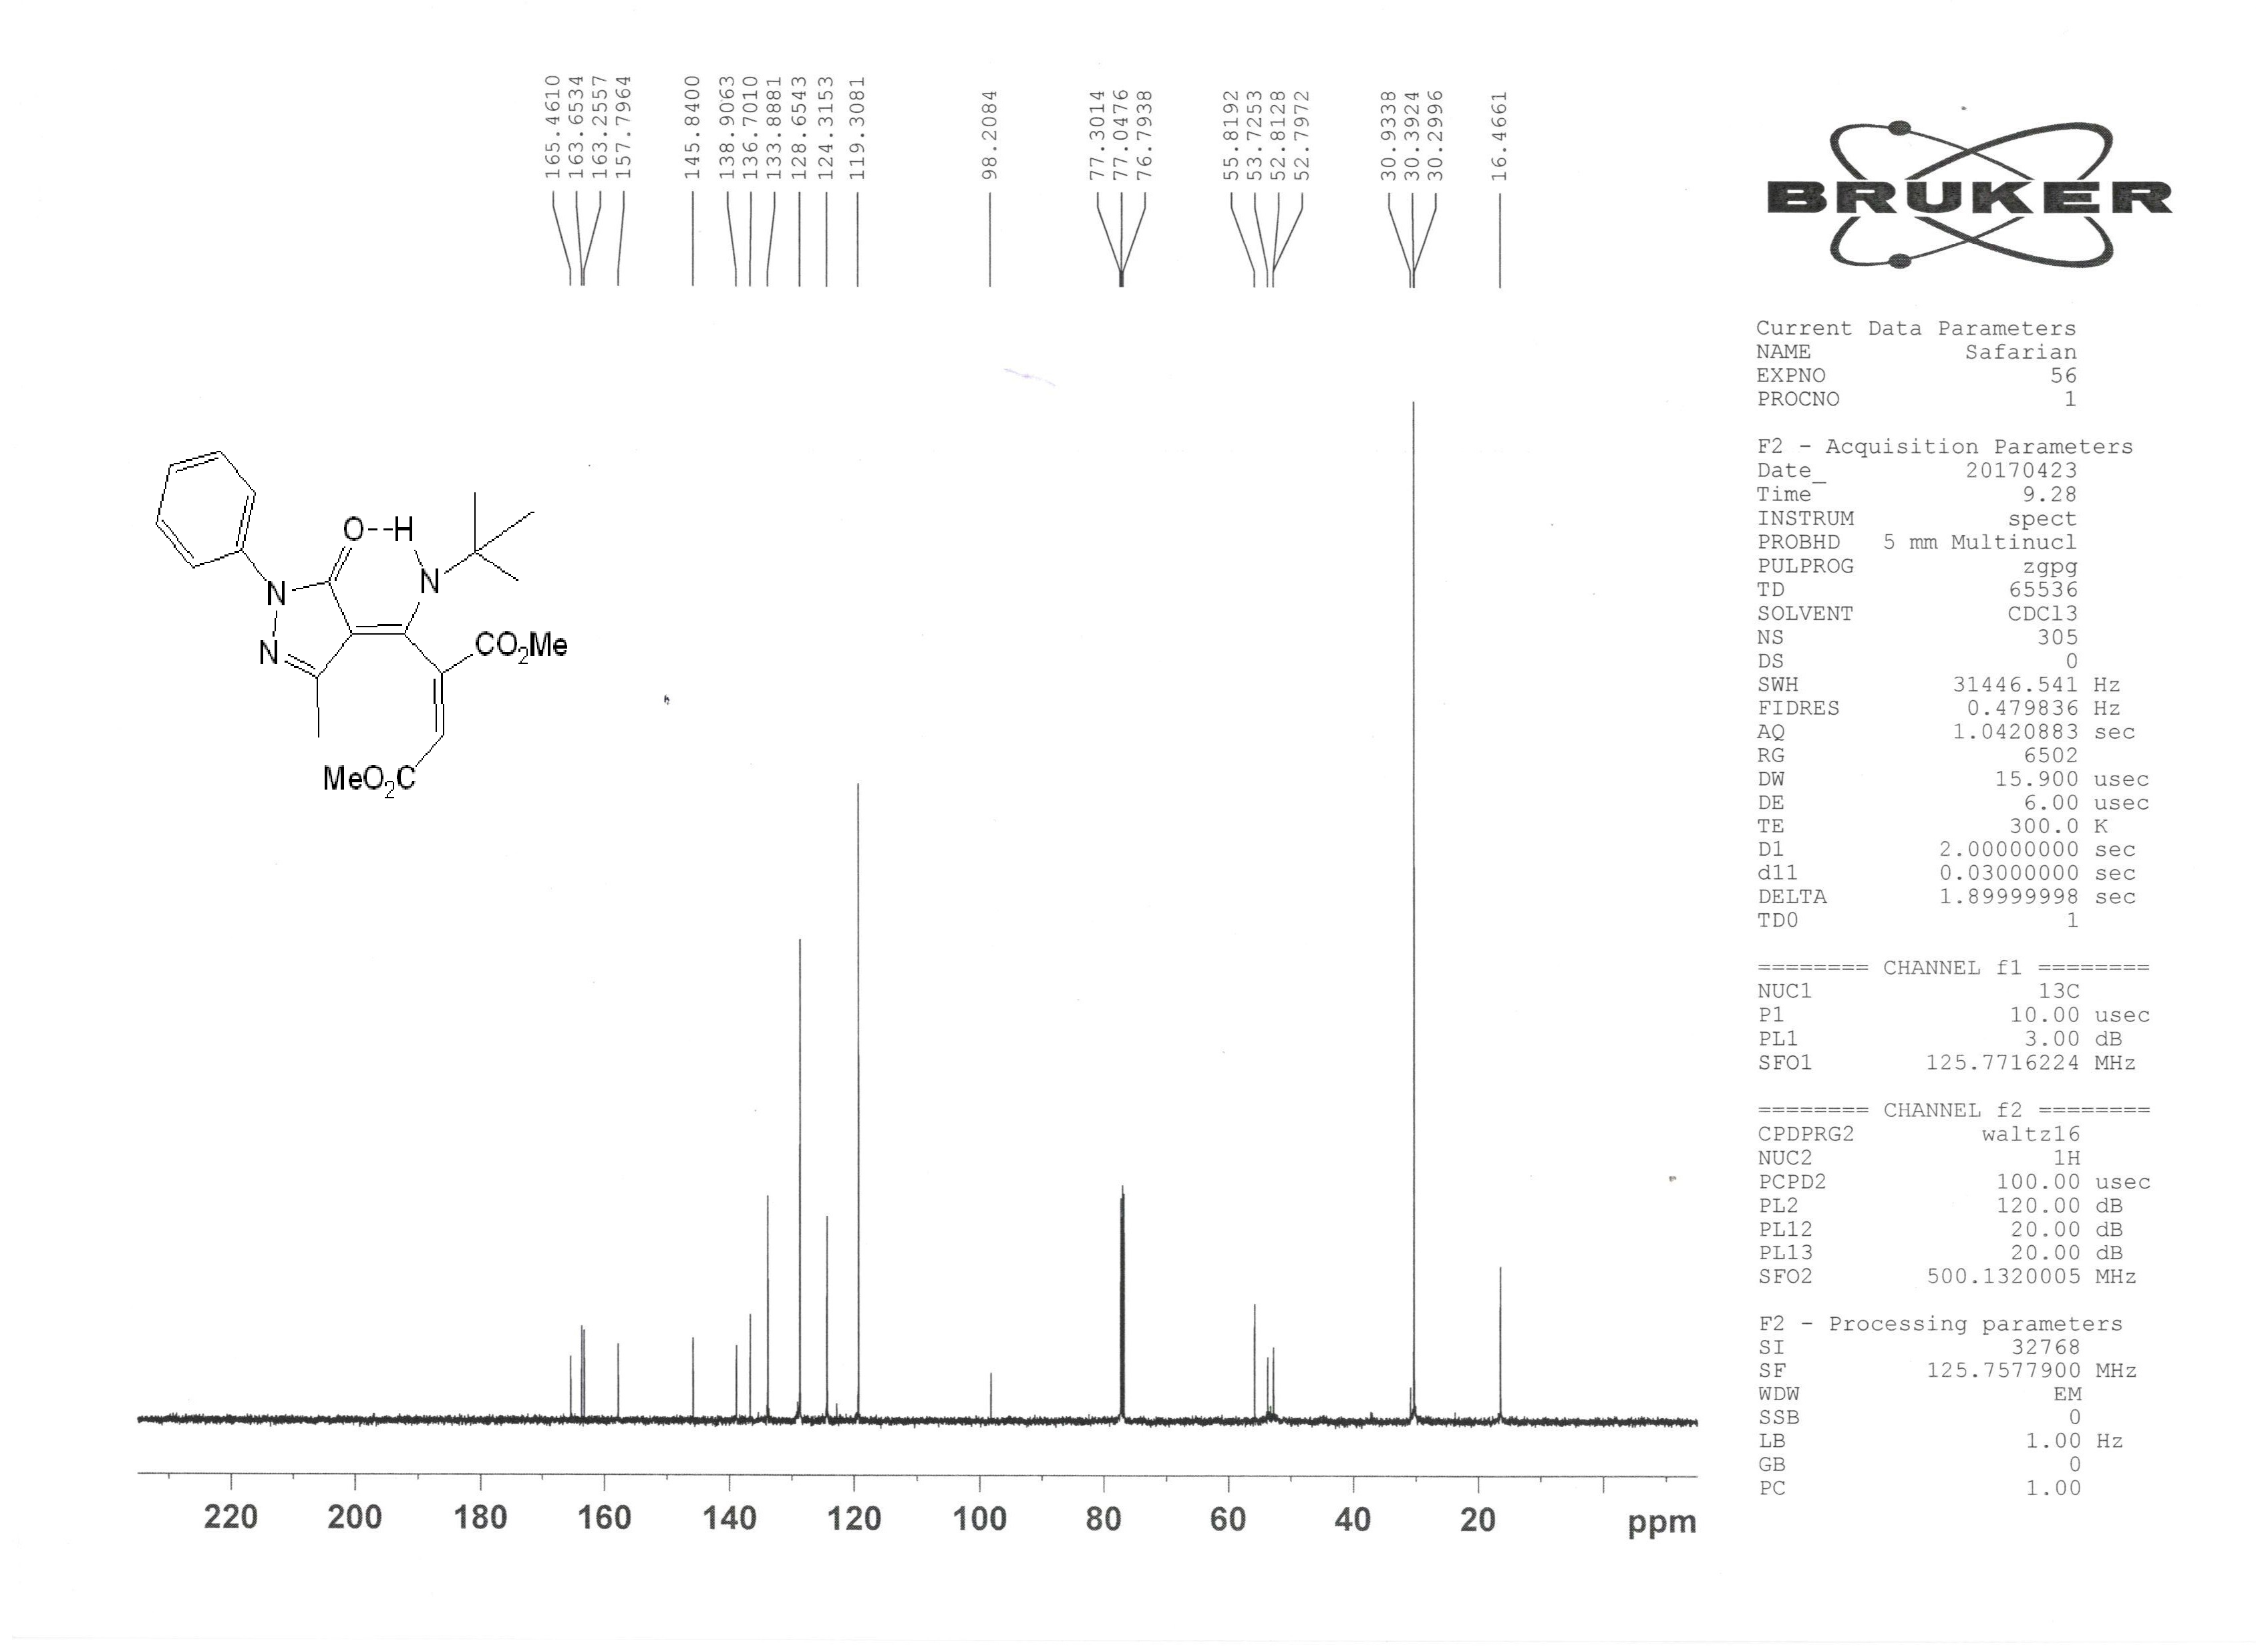


Diethyl 2-((Z)-(*tert*-butylamino)(3-methyl-5-oxo-1-phenyl-1,5-dihydro-4H-pyrazol-4-ylidene)methyl)fumarate (**5b**):

**
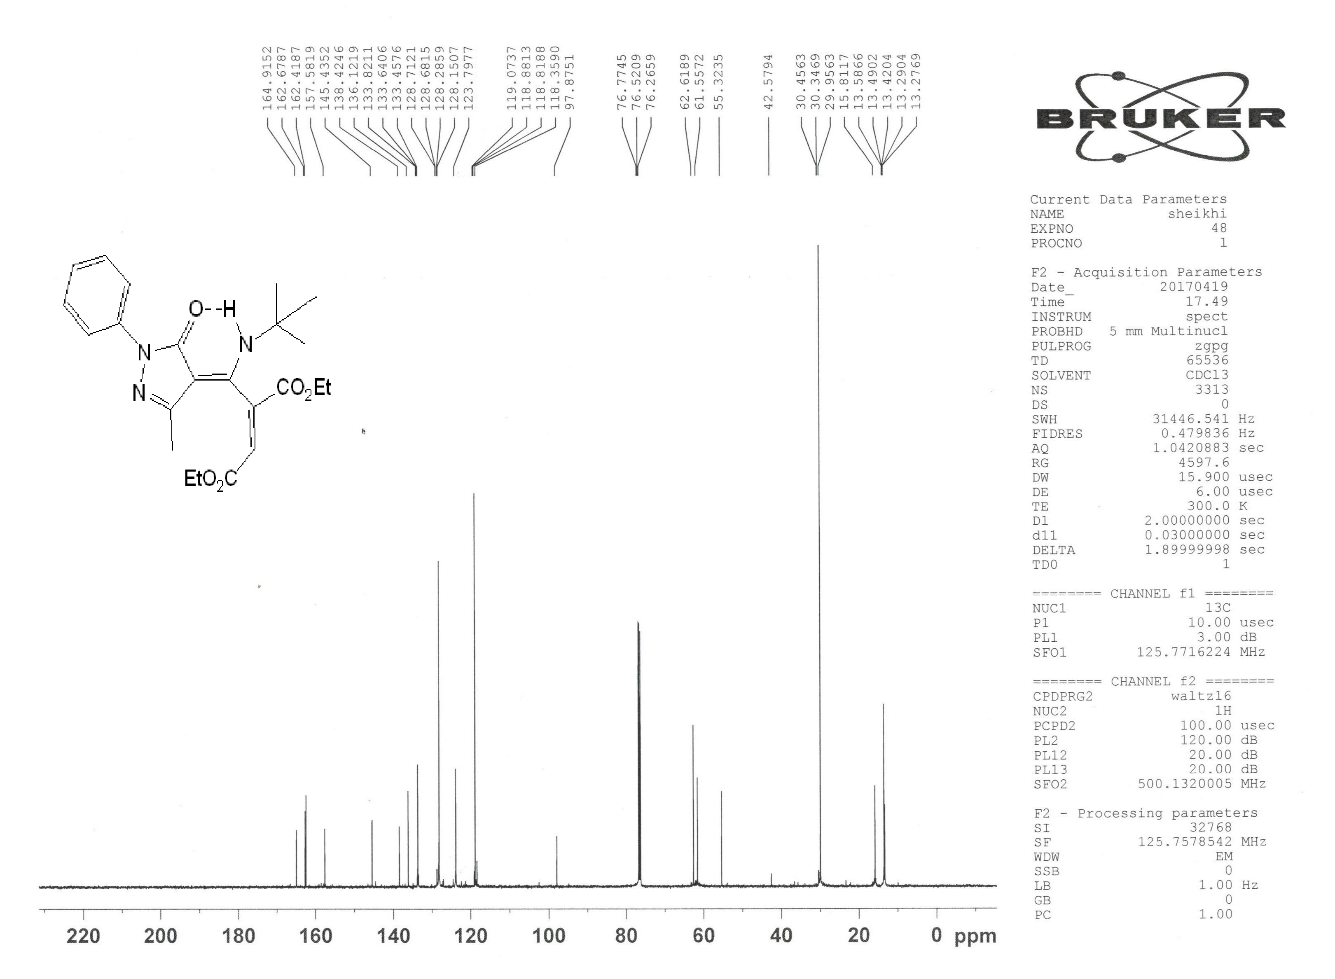

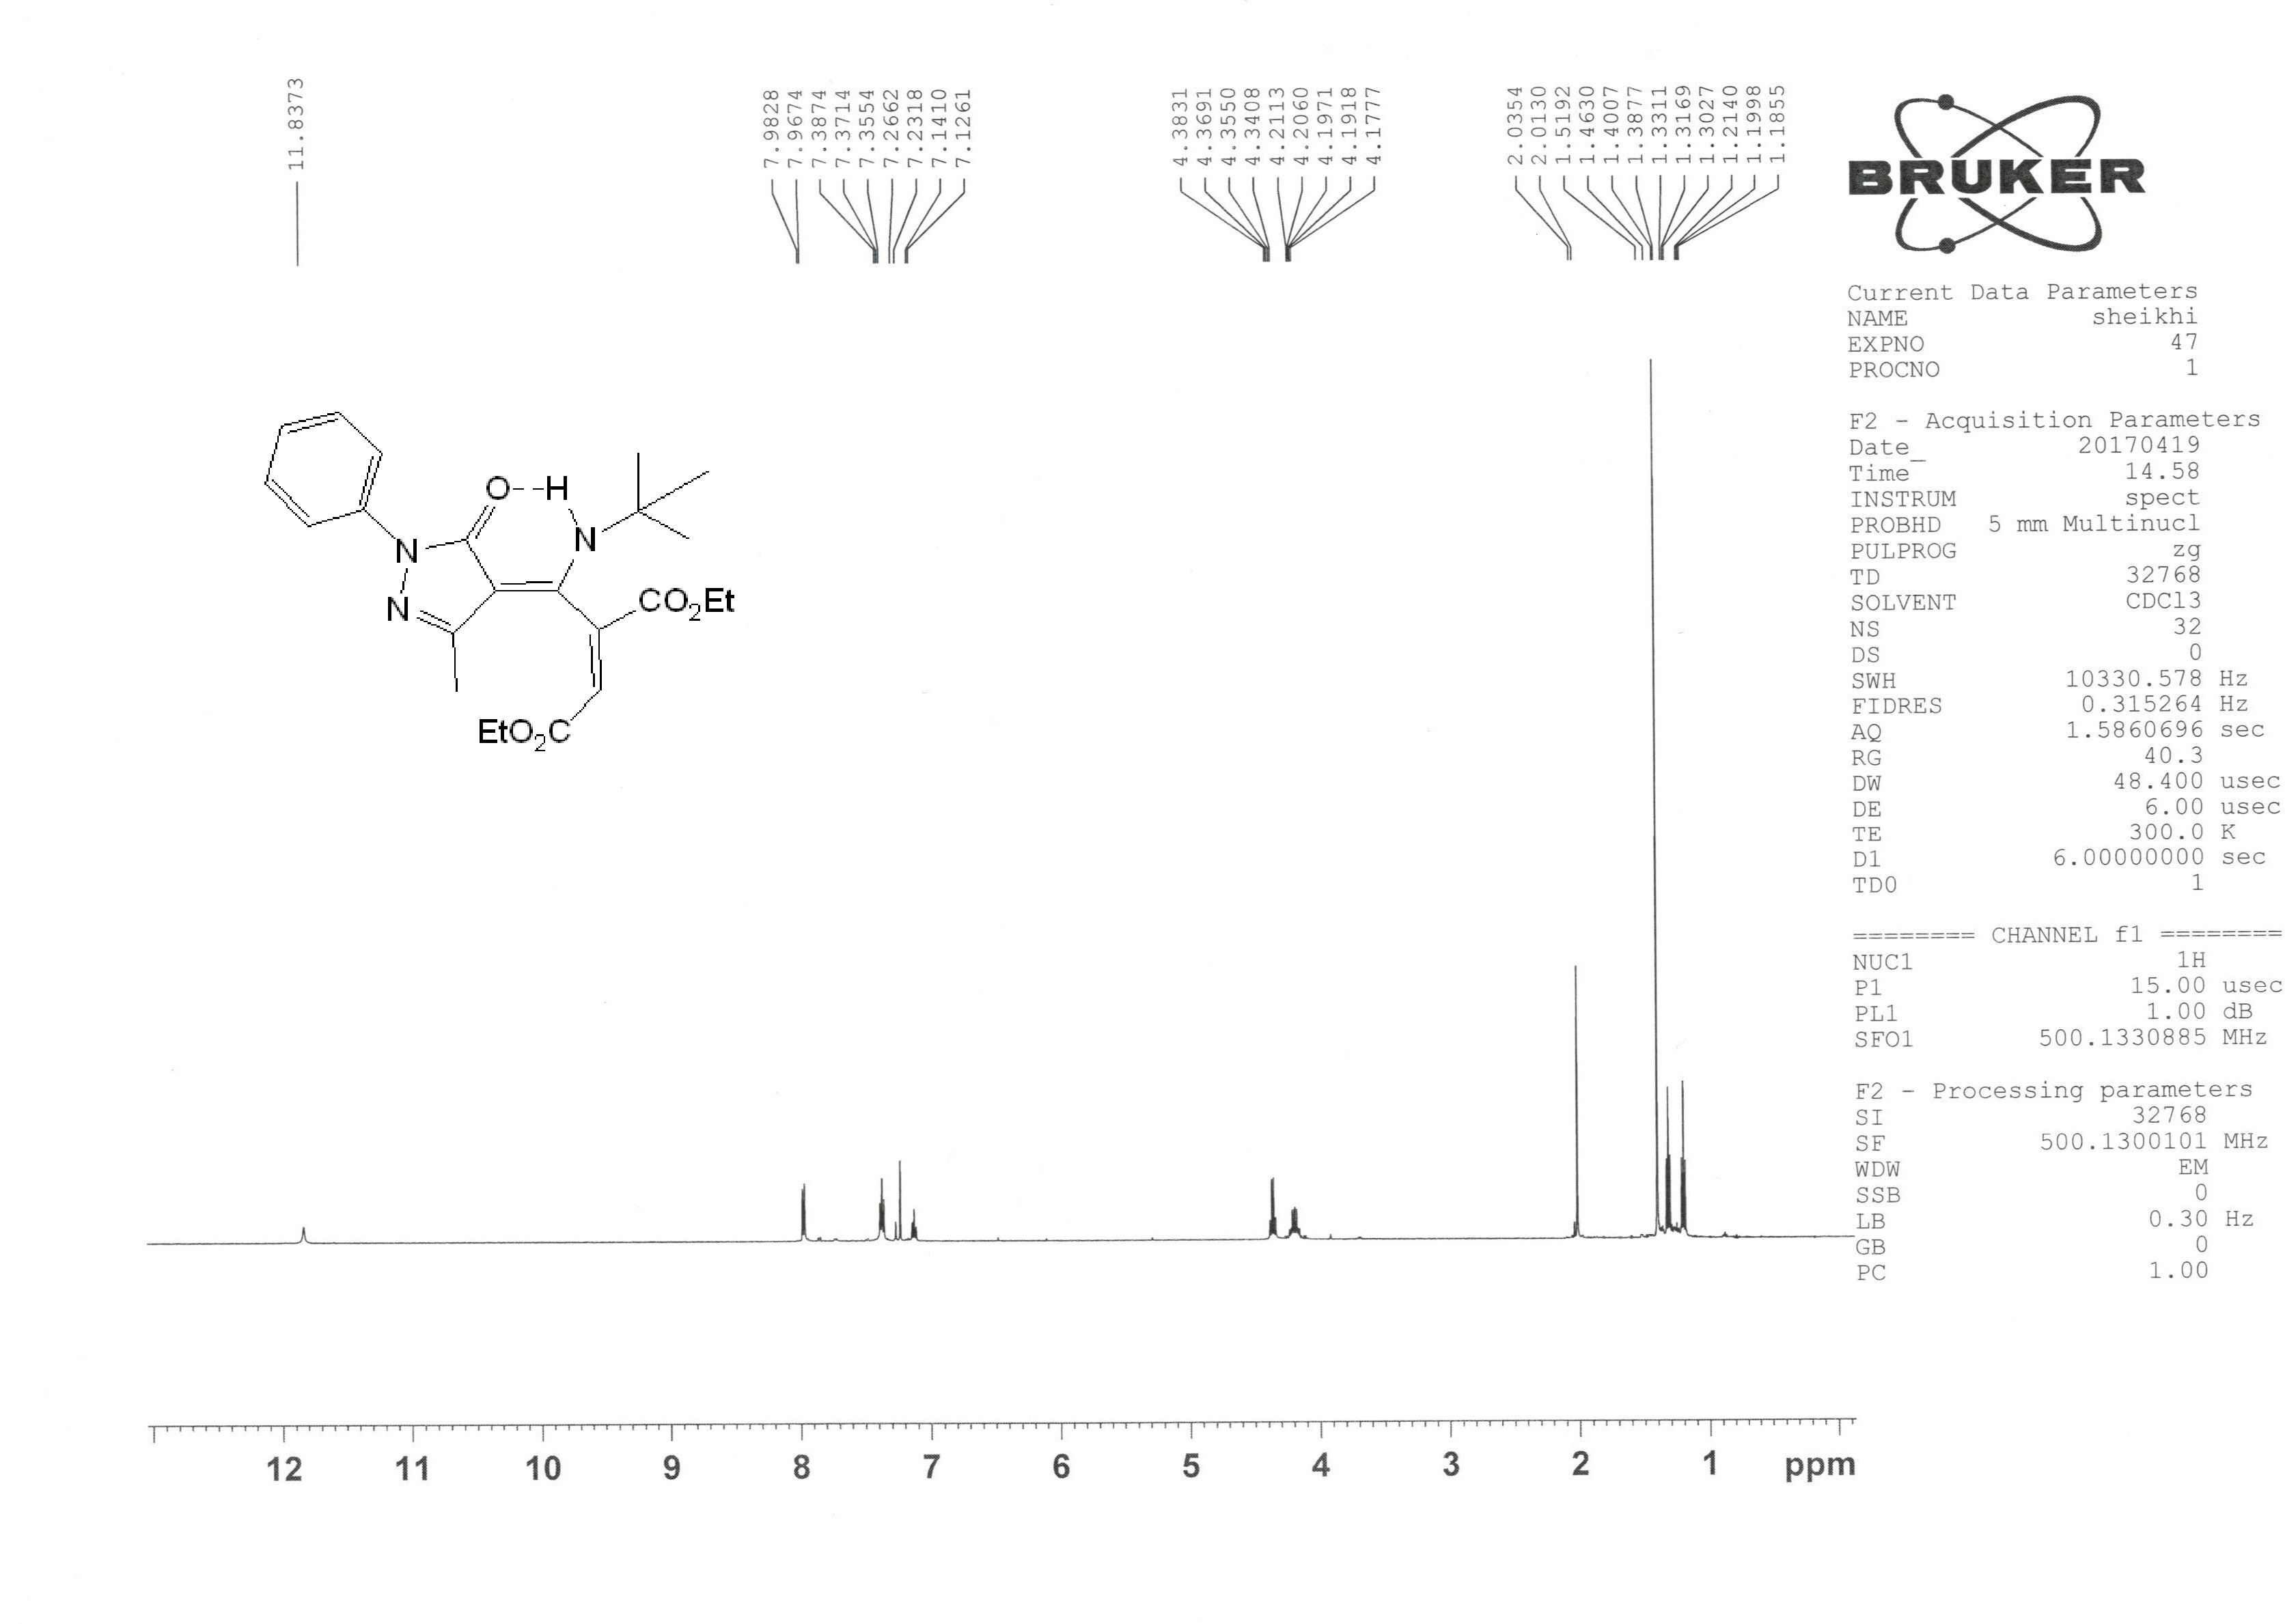
**

Dimethyl 2-((*Z*)-(cyclohexylamino)(3-methyl-5-oxo-1-phenyl-1,5-dihydro-4*H*-pyrazol-4-ylidene)methyl)fumarate (**5c**):


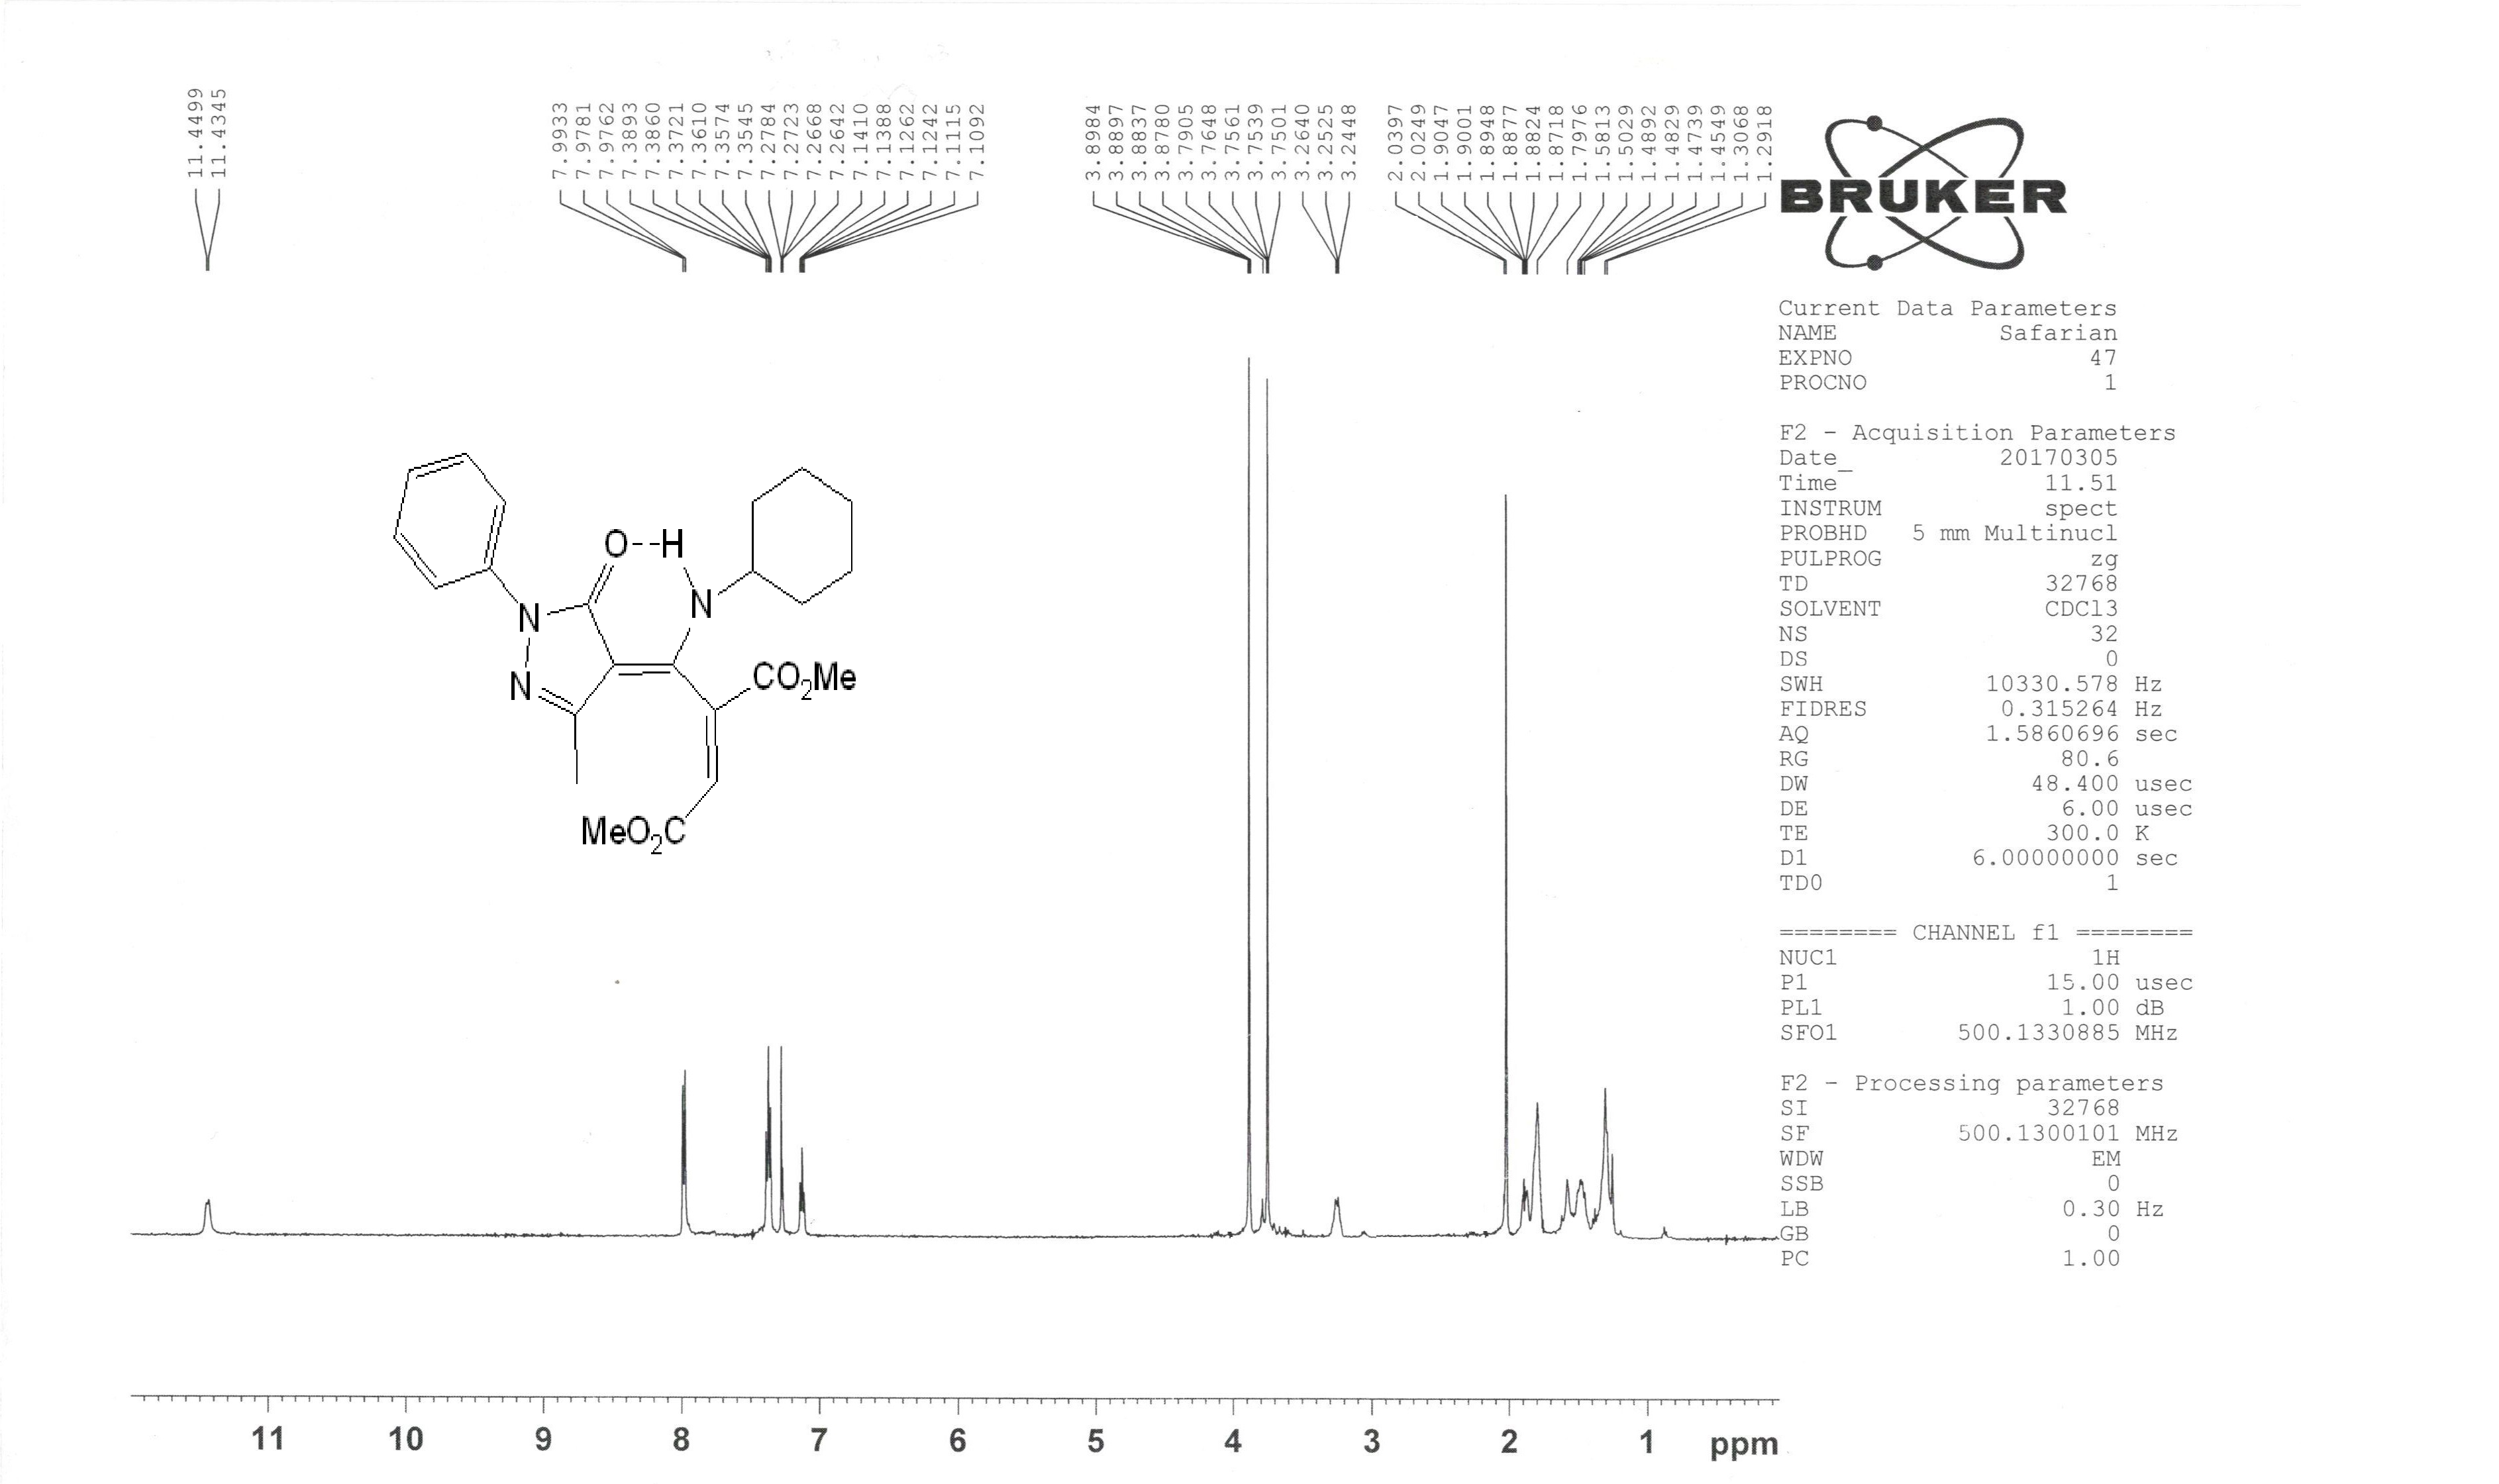


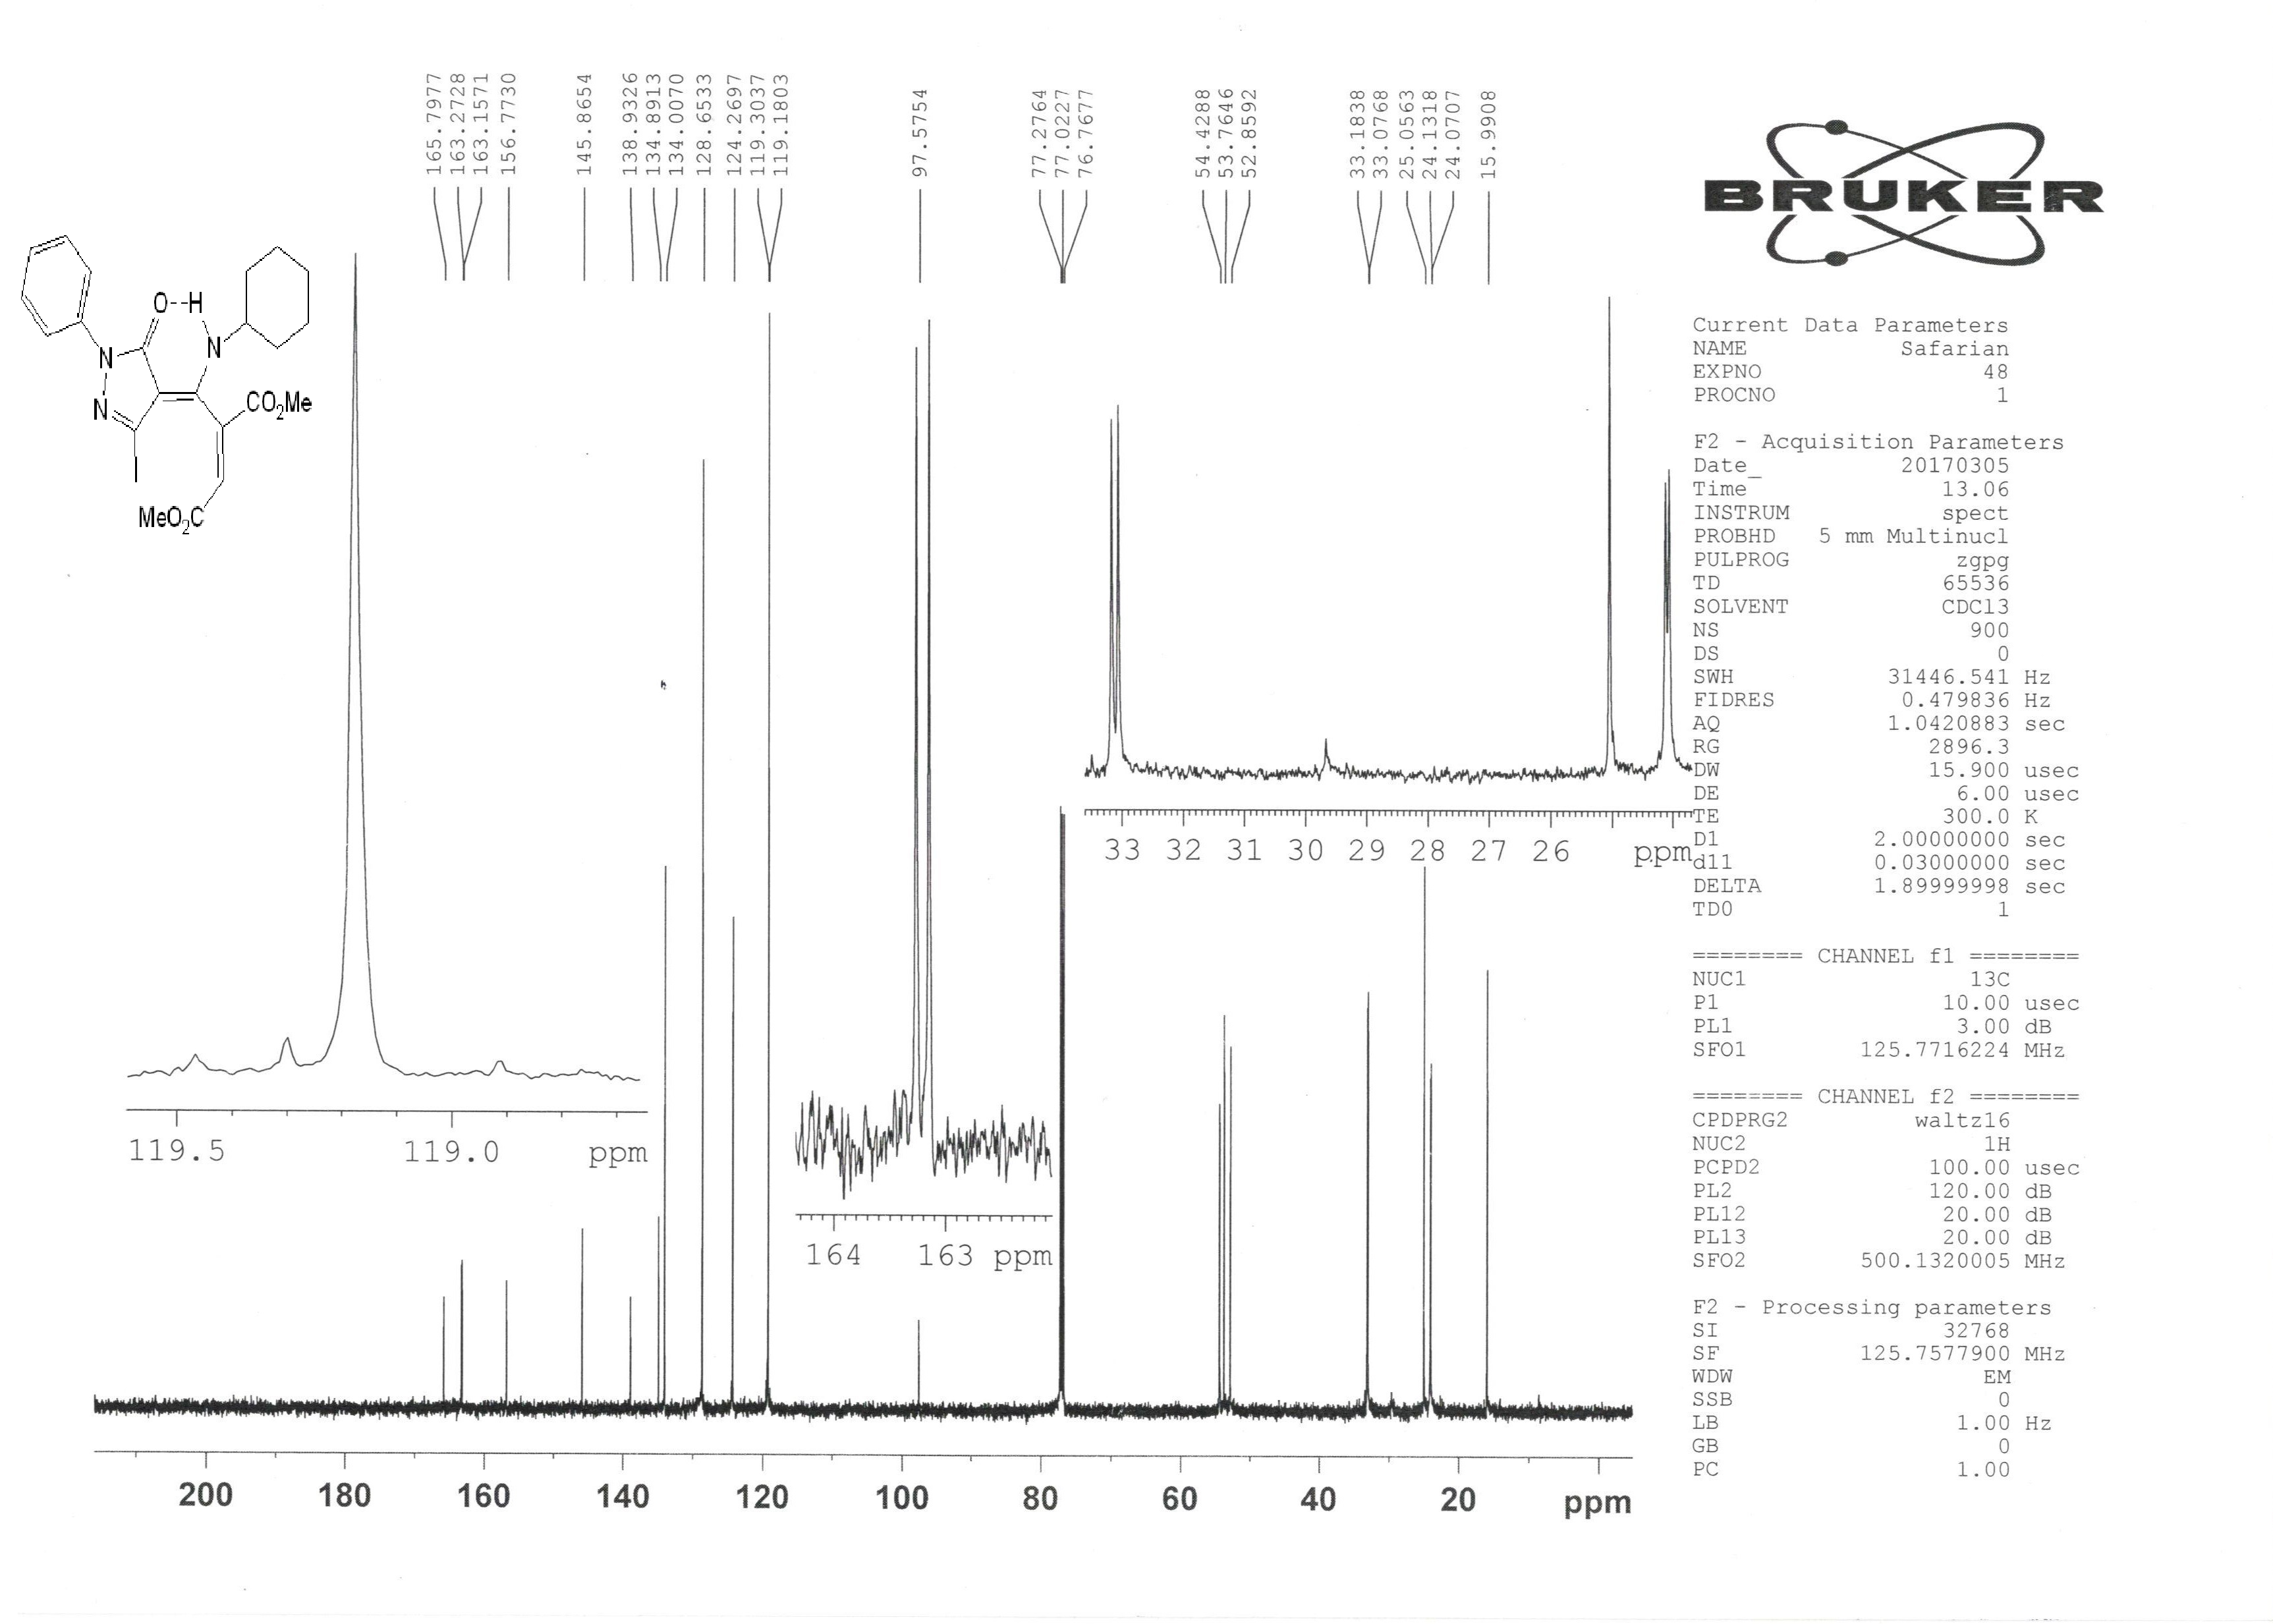


Diethyl 2-((Z)-(cyclohexylamino)(3-methyl-5-oxo-1-phenyl-1,5-dihydro-4H-pyrazol-4-ylidene)methyl)fumarate (**5d**):


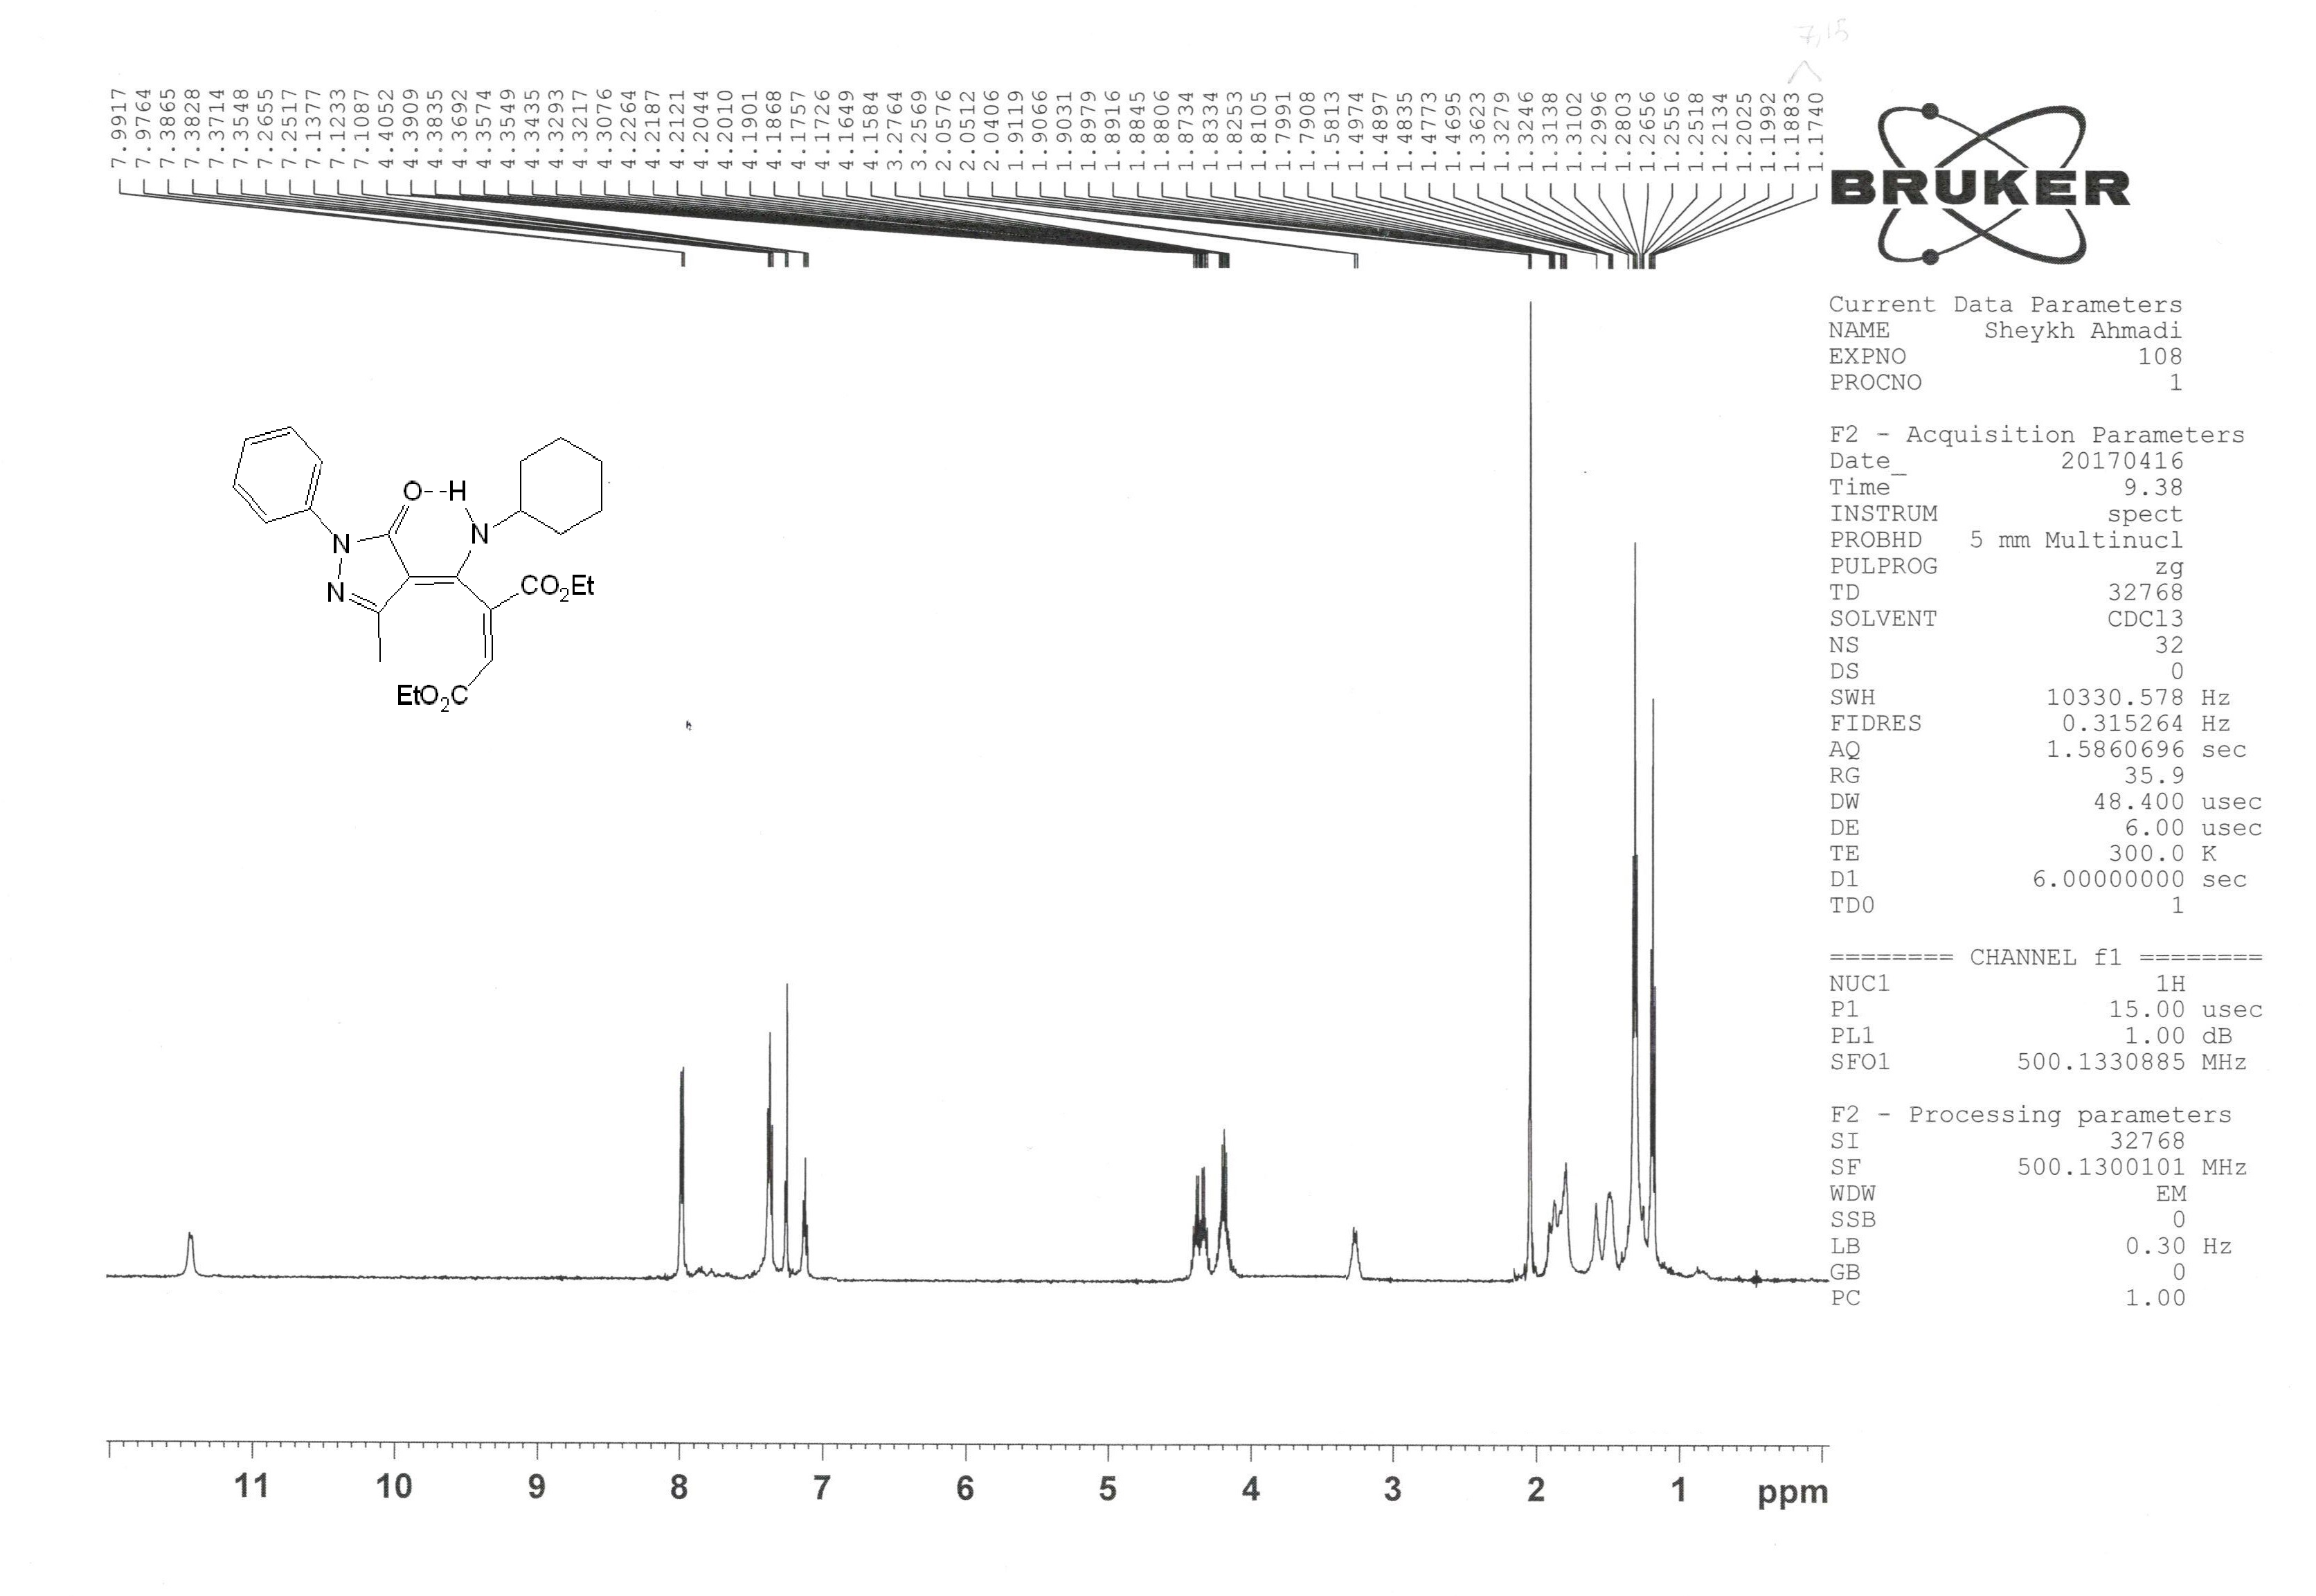


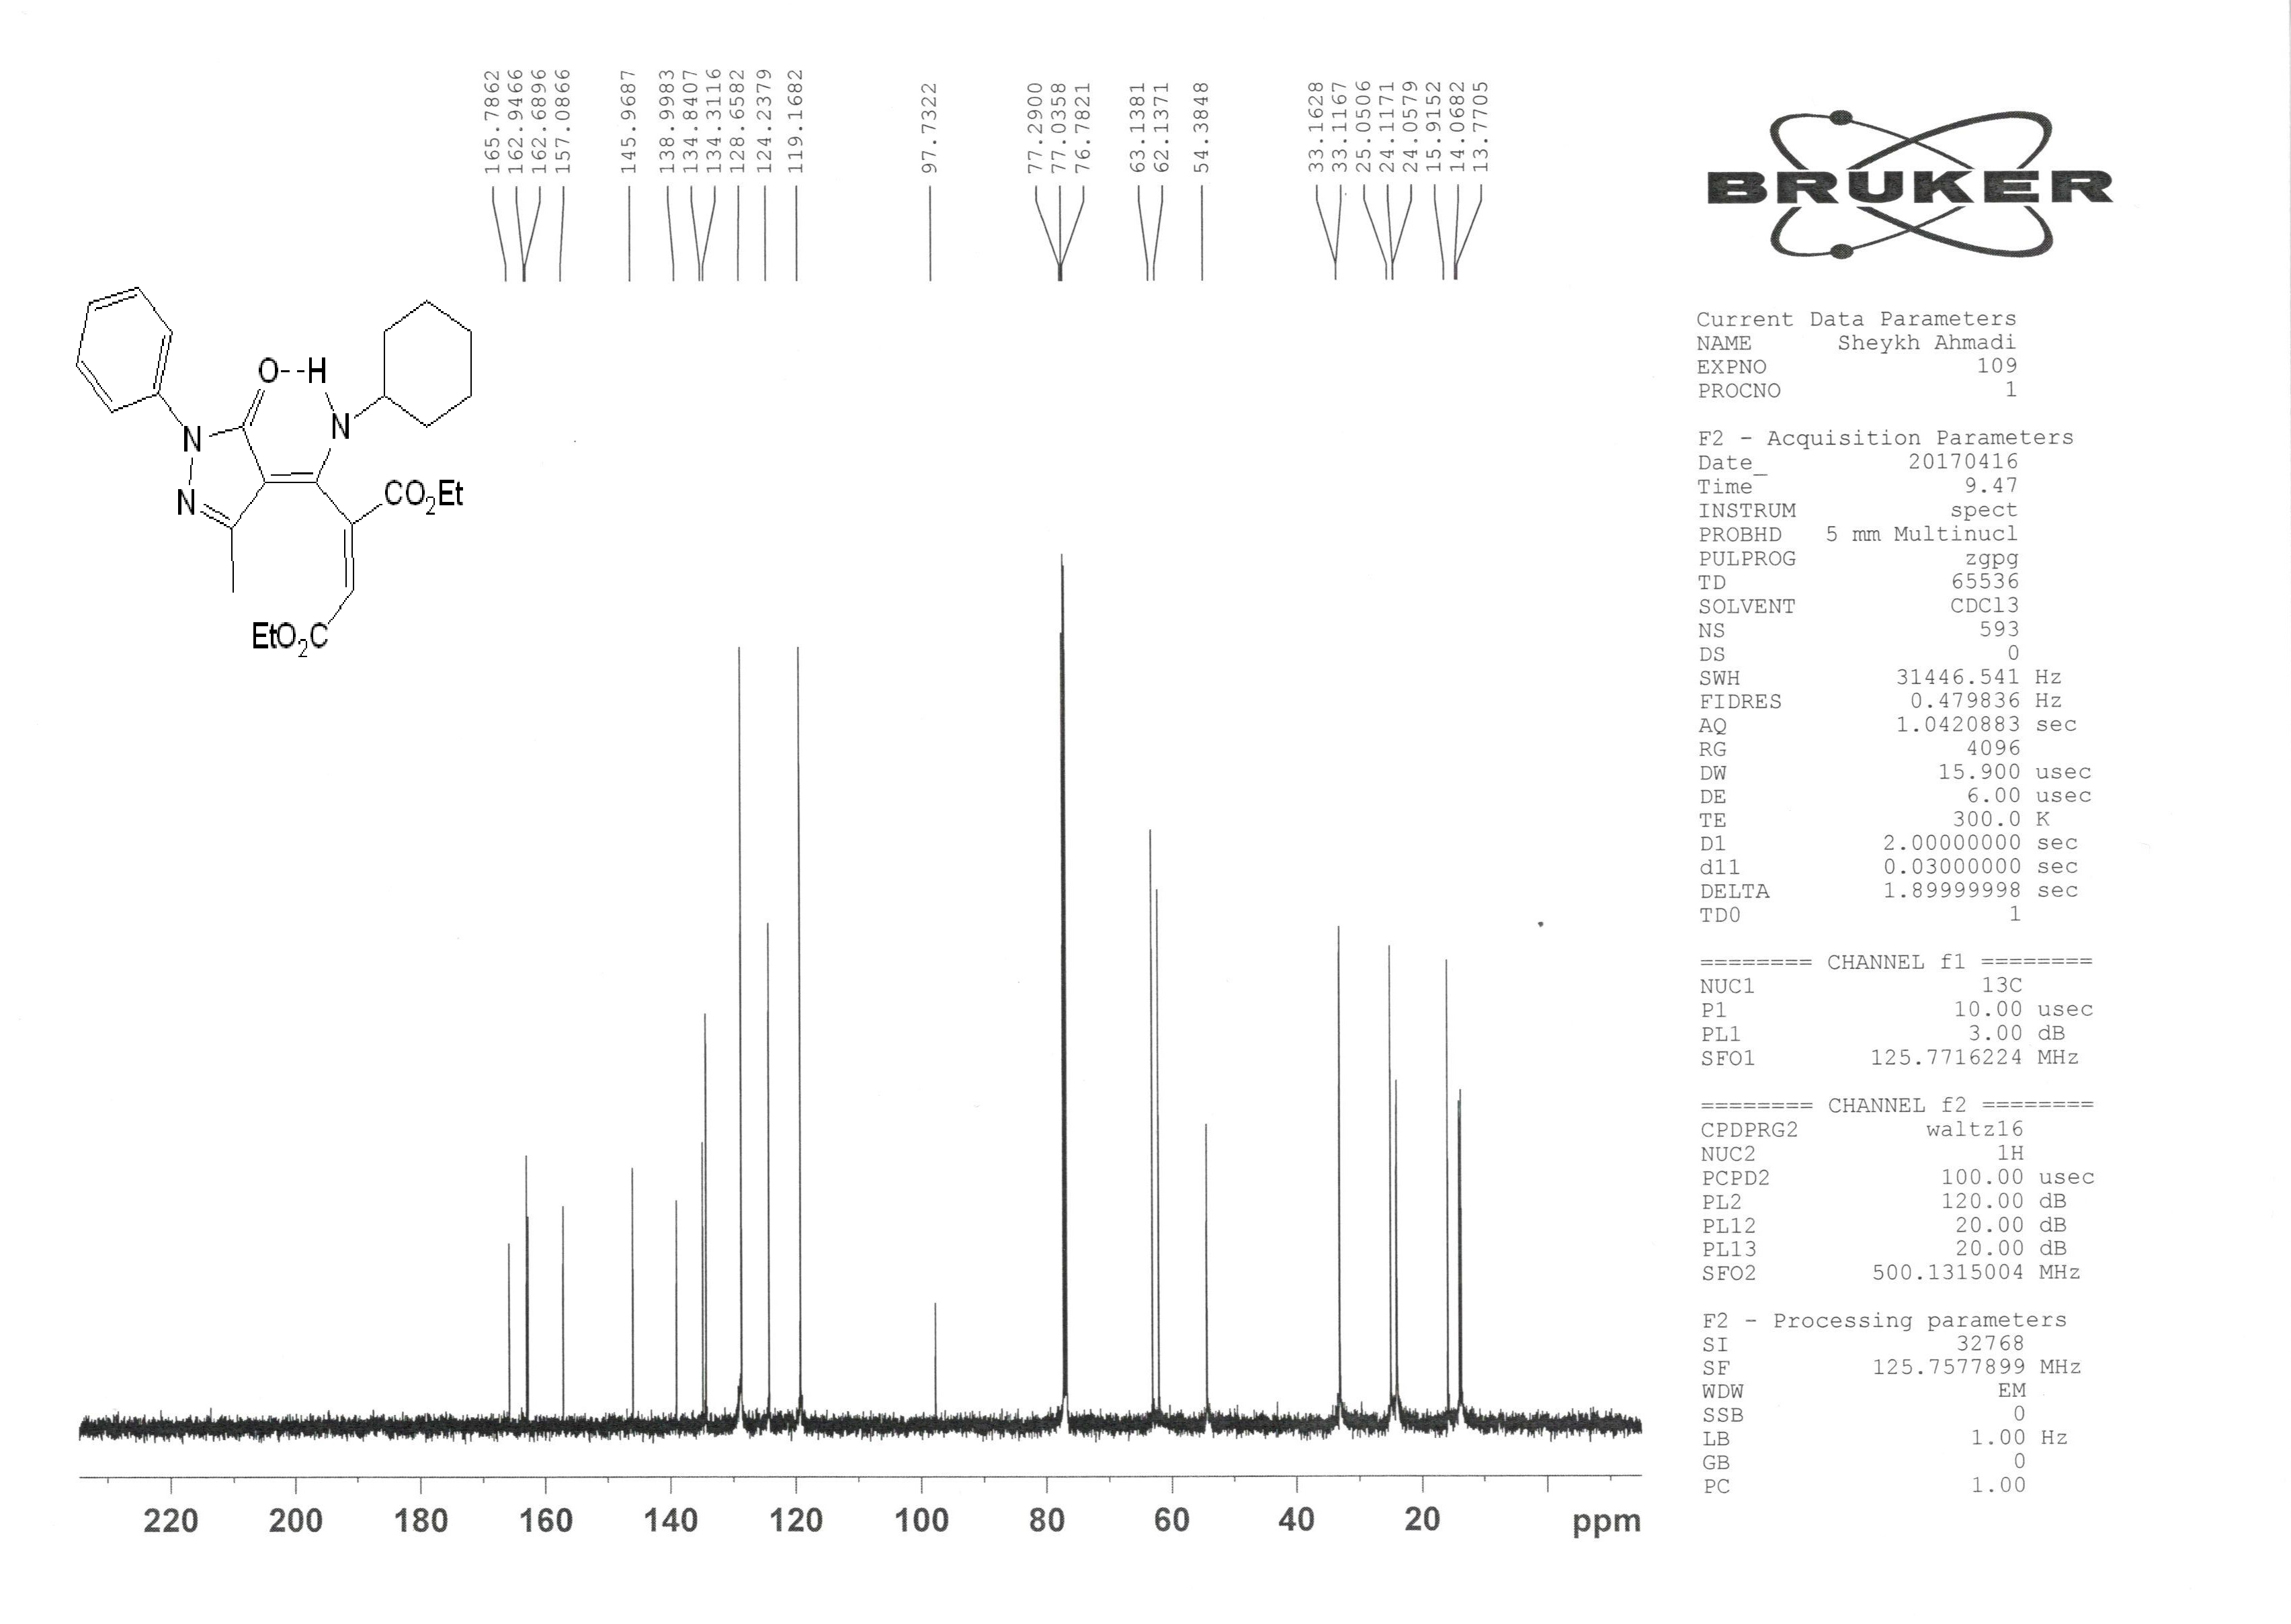


Dimethyl 2-((Z)-(tert-butylamino)(3-(2-methoxy-2-oxoethyl)-5-oxo-1-phenyl-1,5-dihydro-4H-pyrazol-4-ylidene)methyl)fumarate (**5e**):


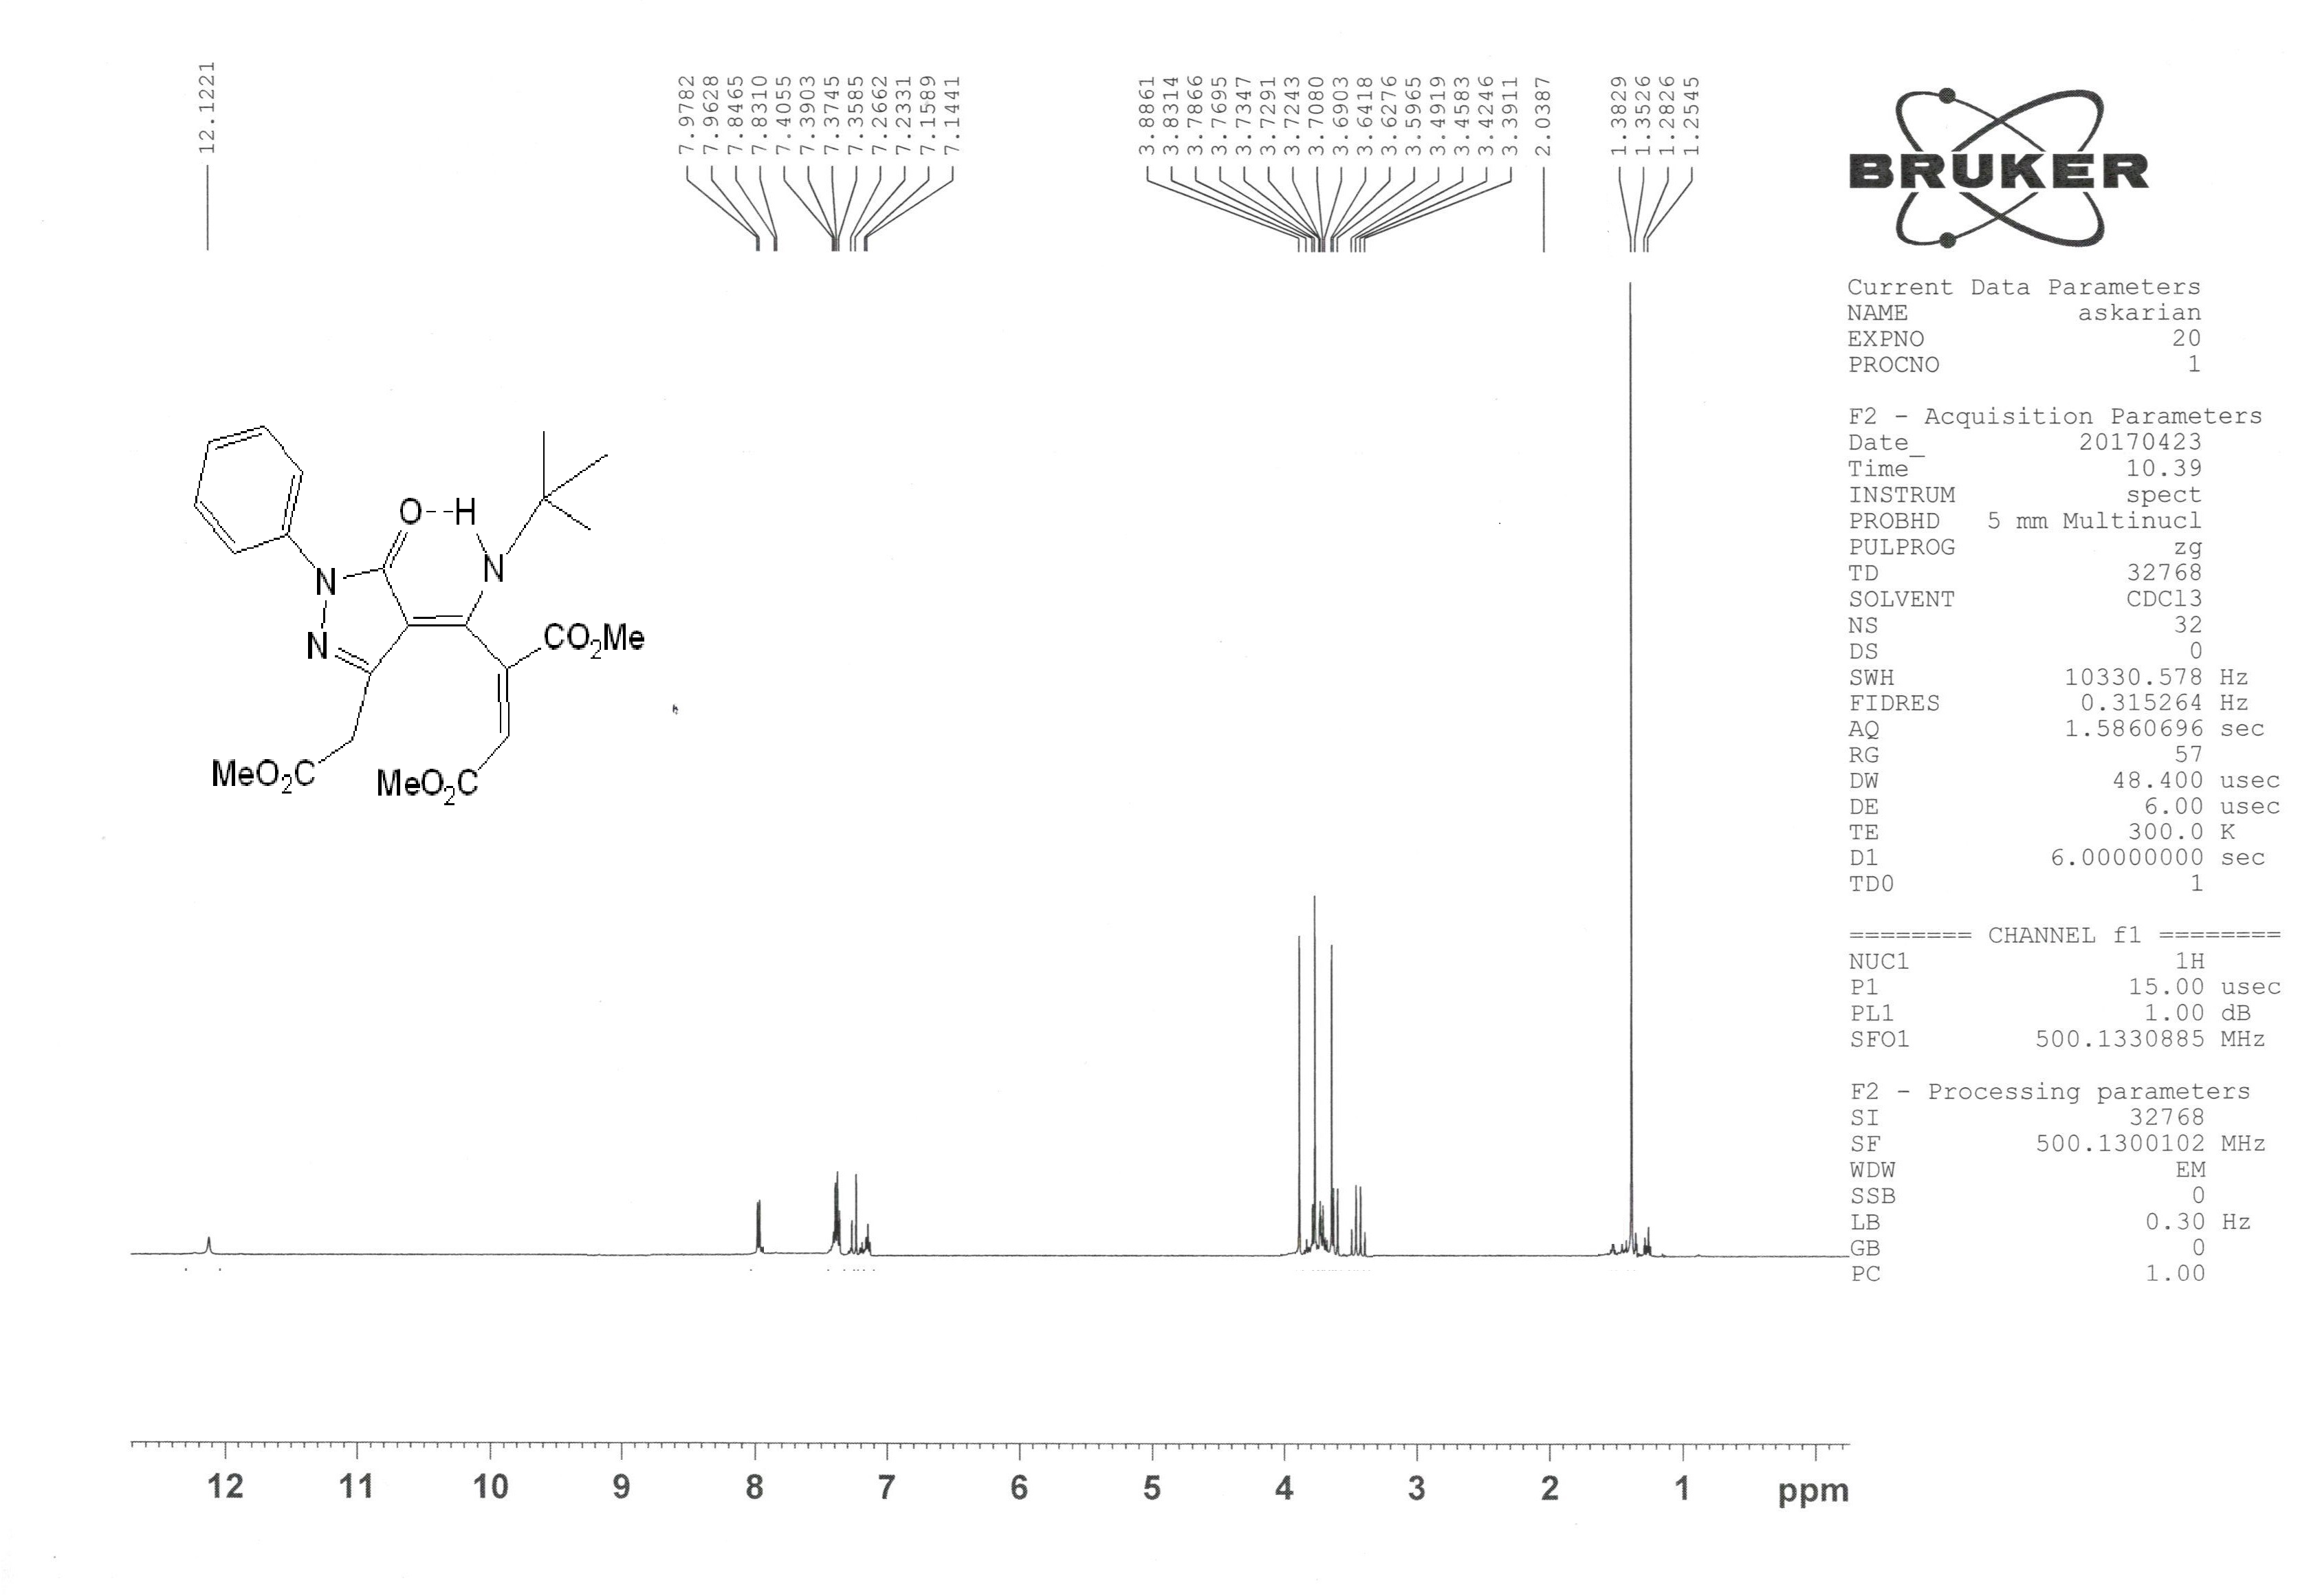


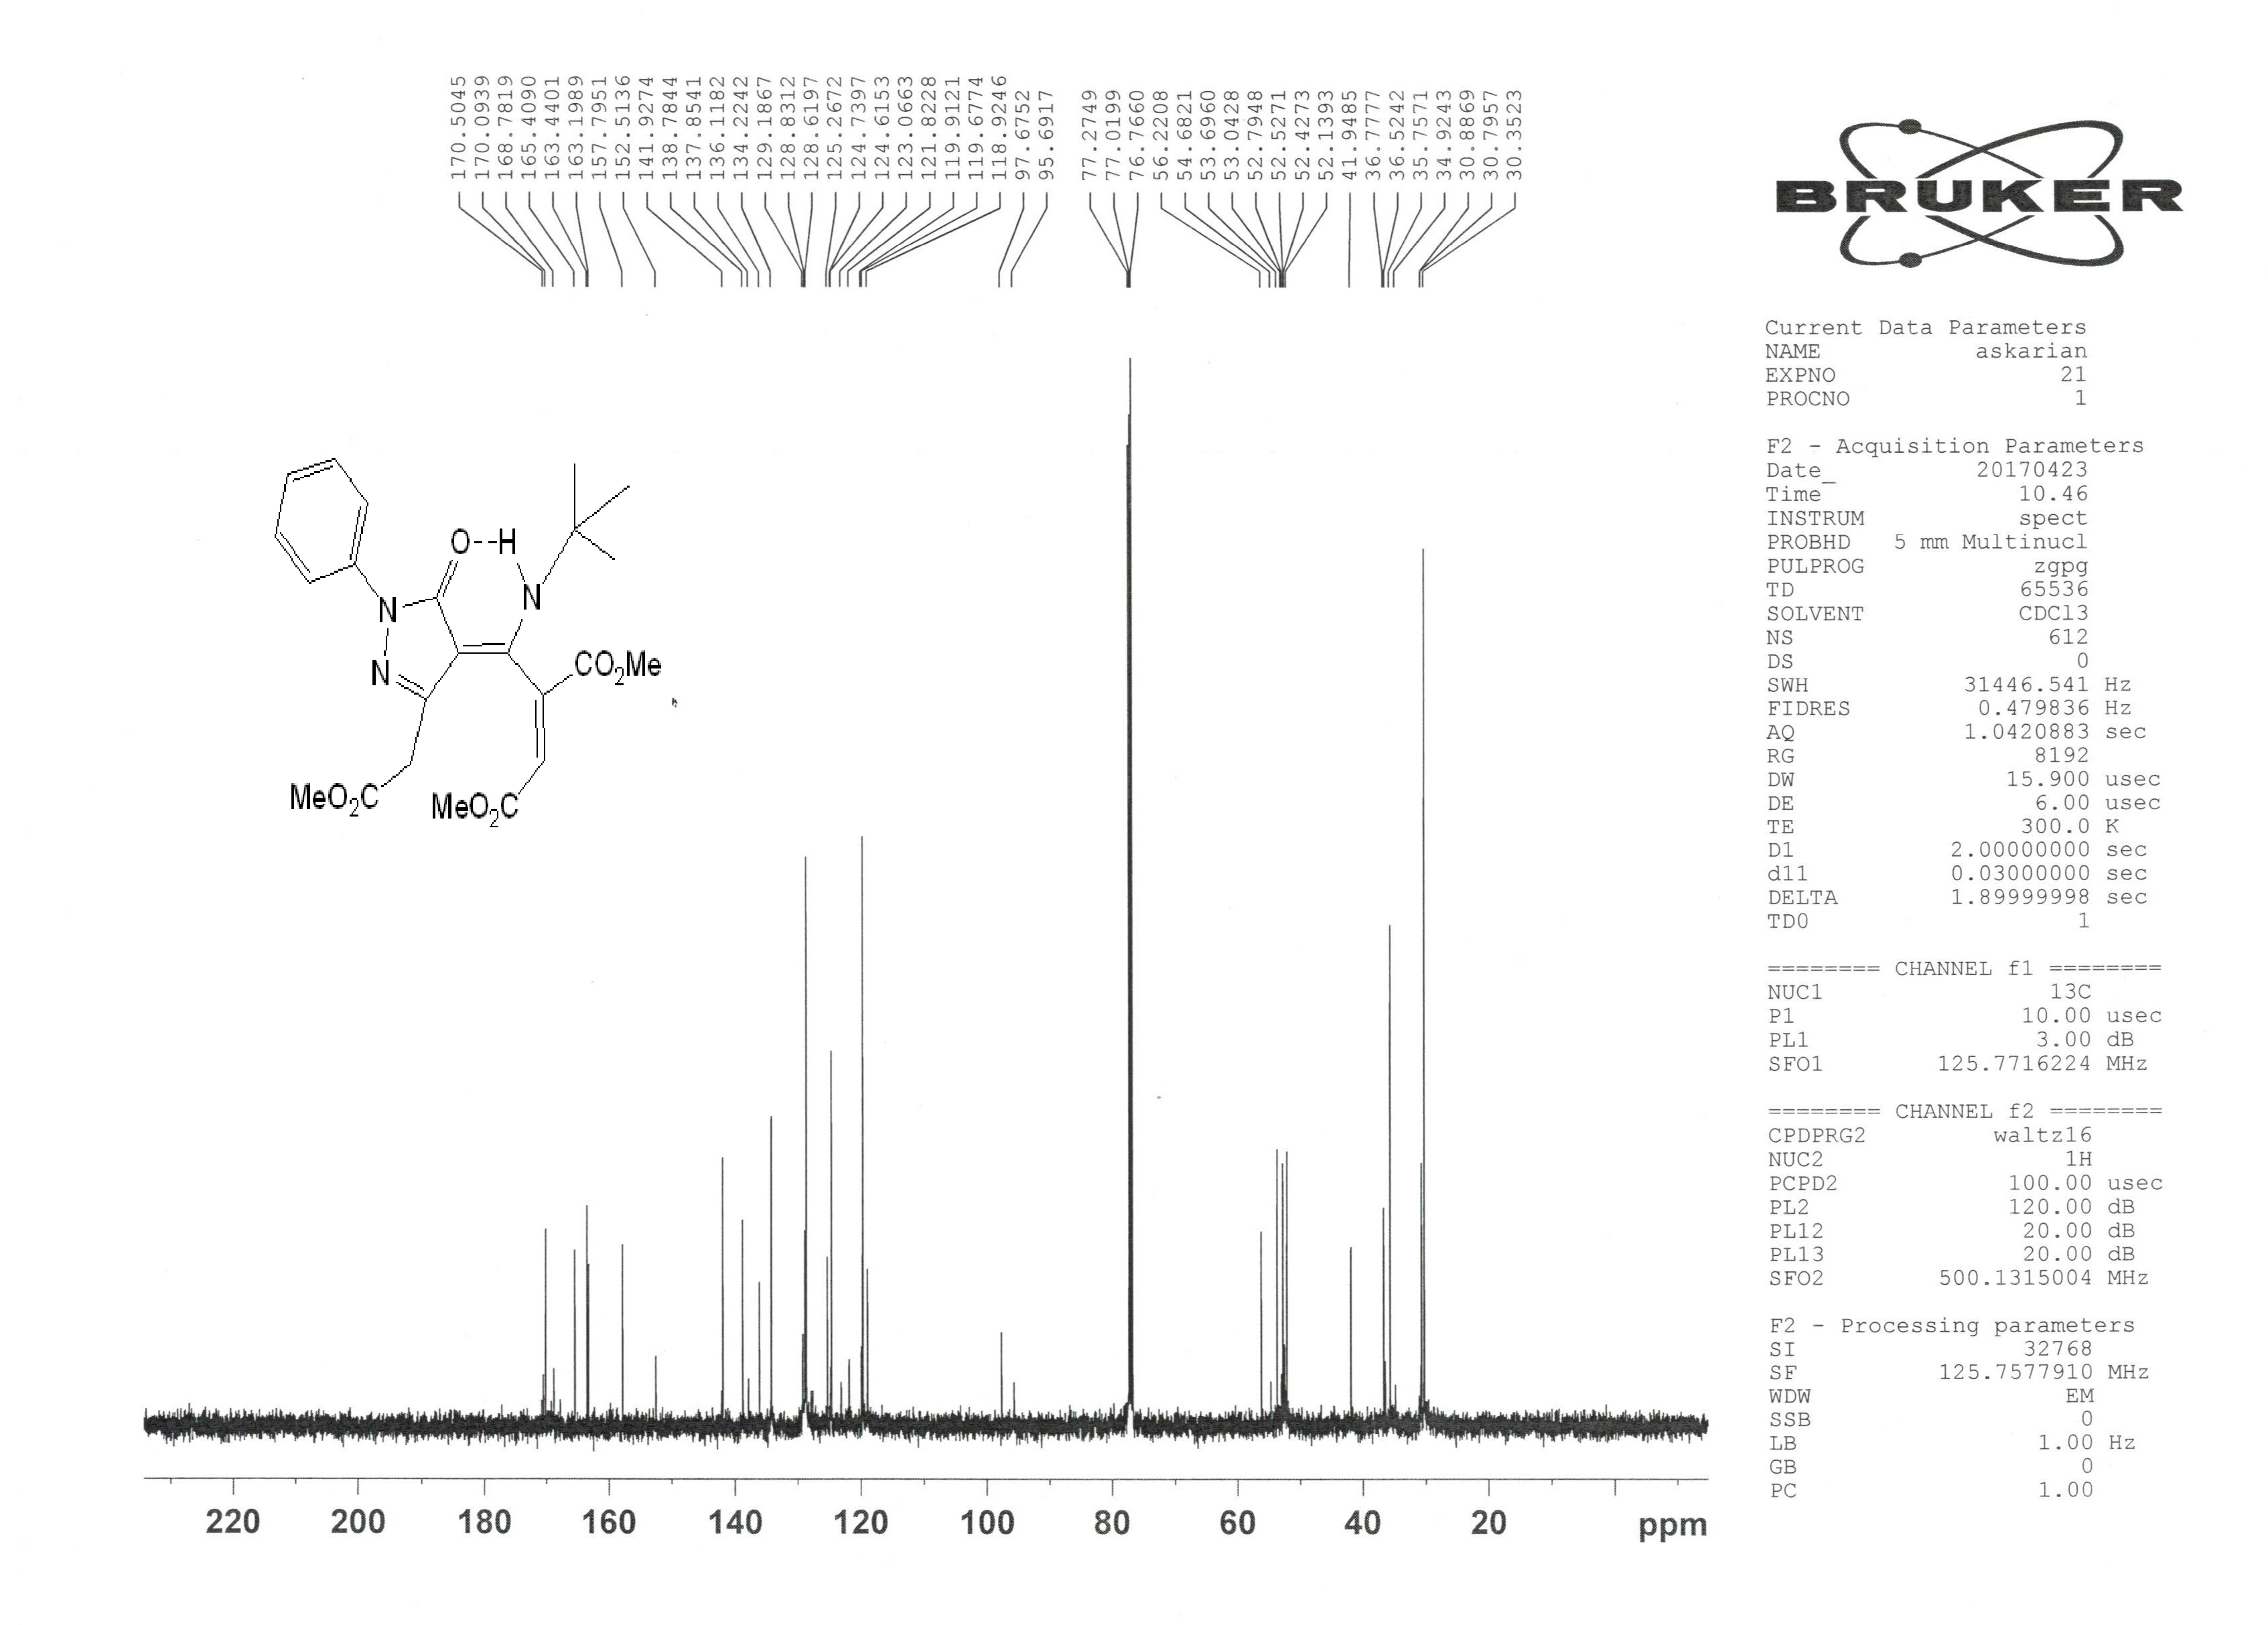


Diethyl 2-((*Z*)-(tert-butylamino)(3-(2-methoxy-2-oxoethyl)-5-oxo-1-phenyl-1,5-dihydro-4*H*-pyrazol-4-ylidene)methyl)fumarate (**5f**):


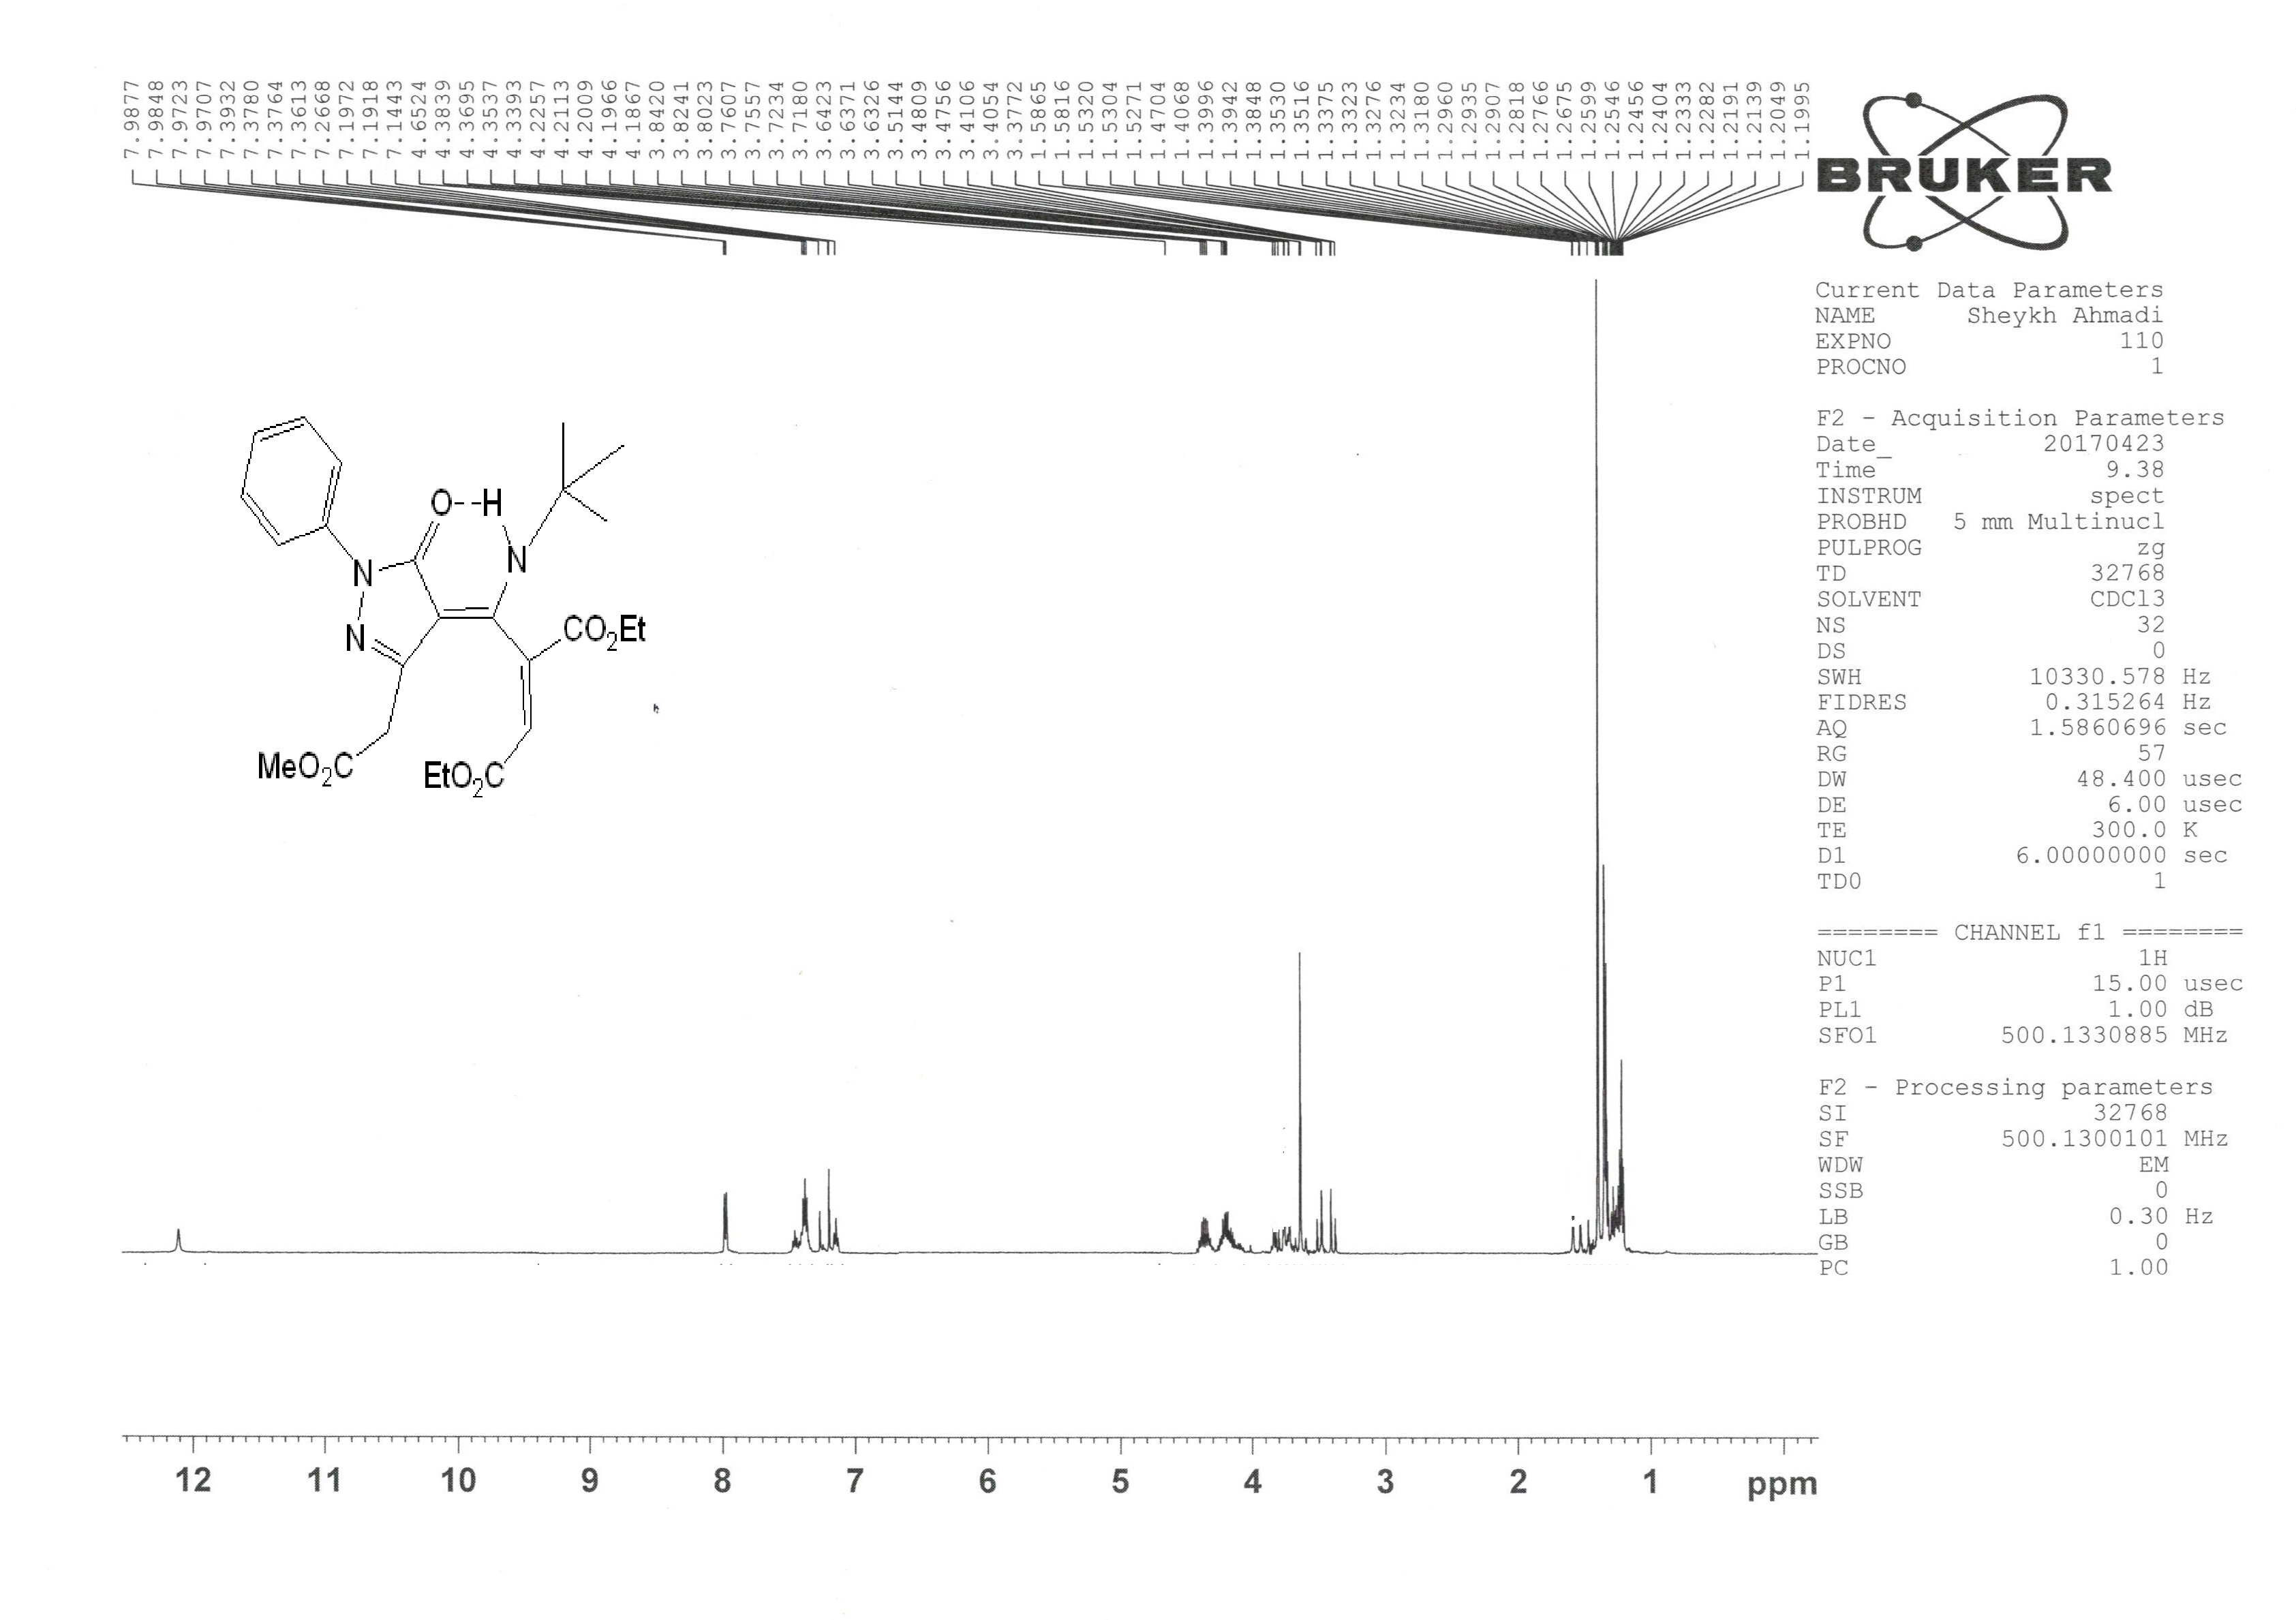


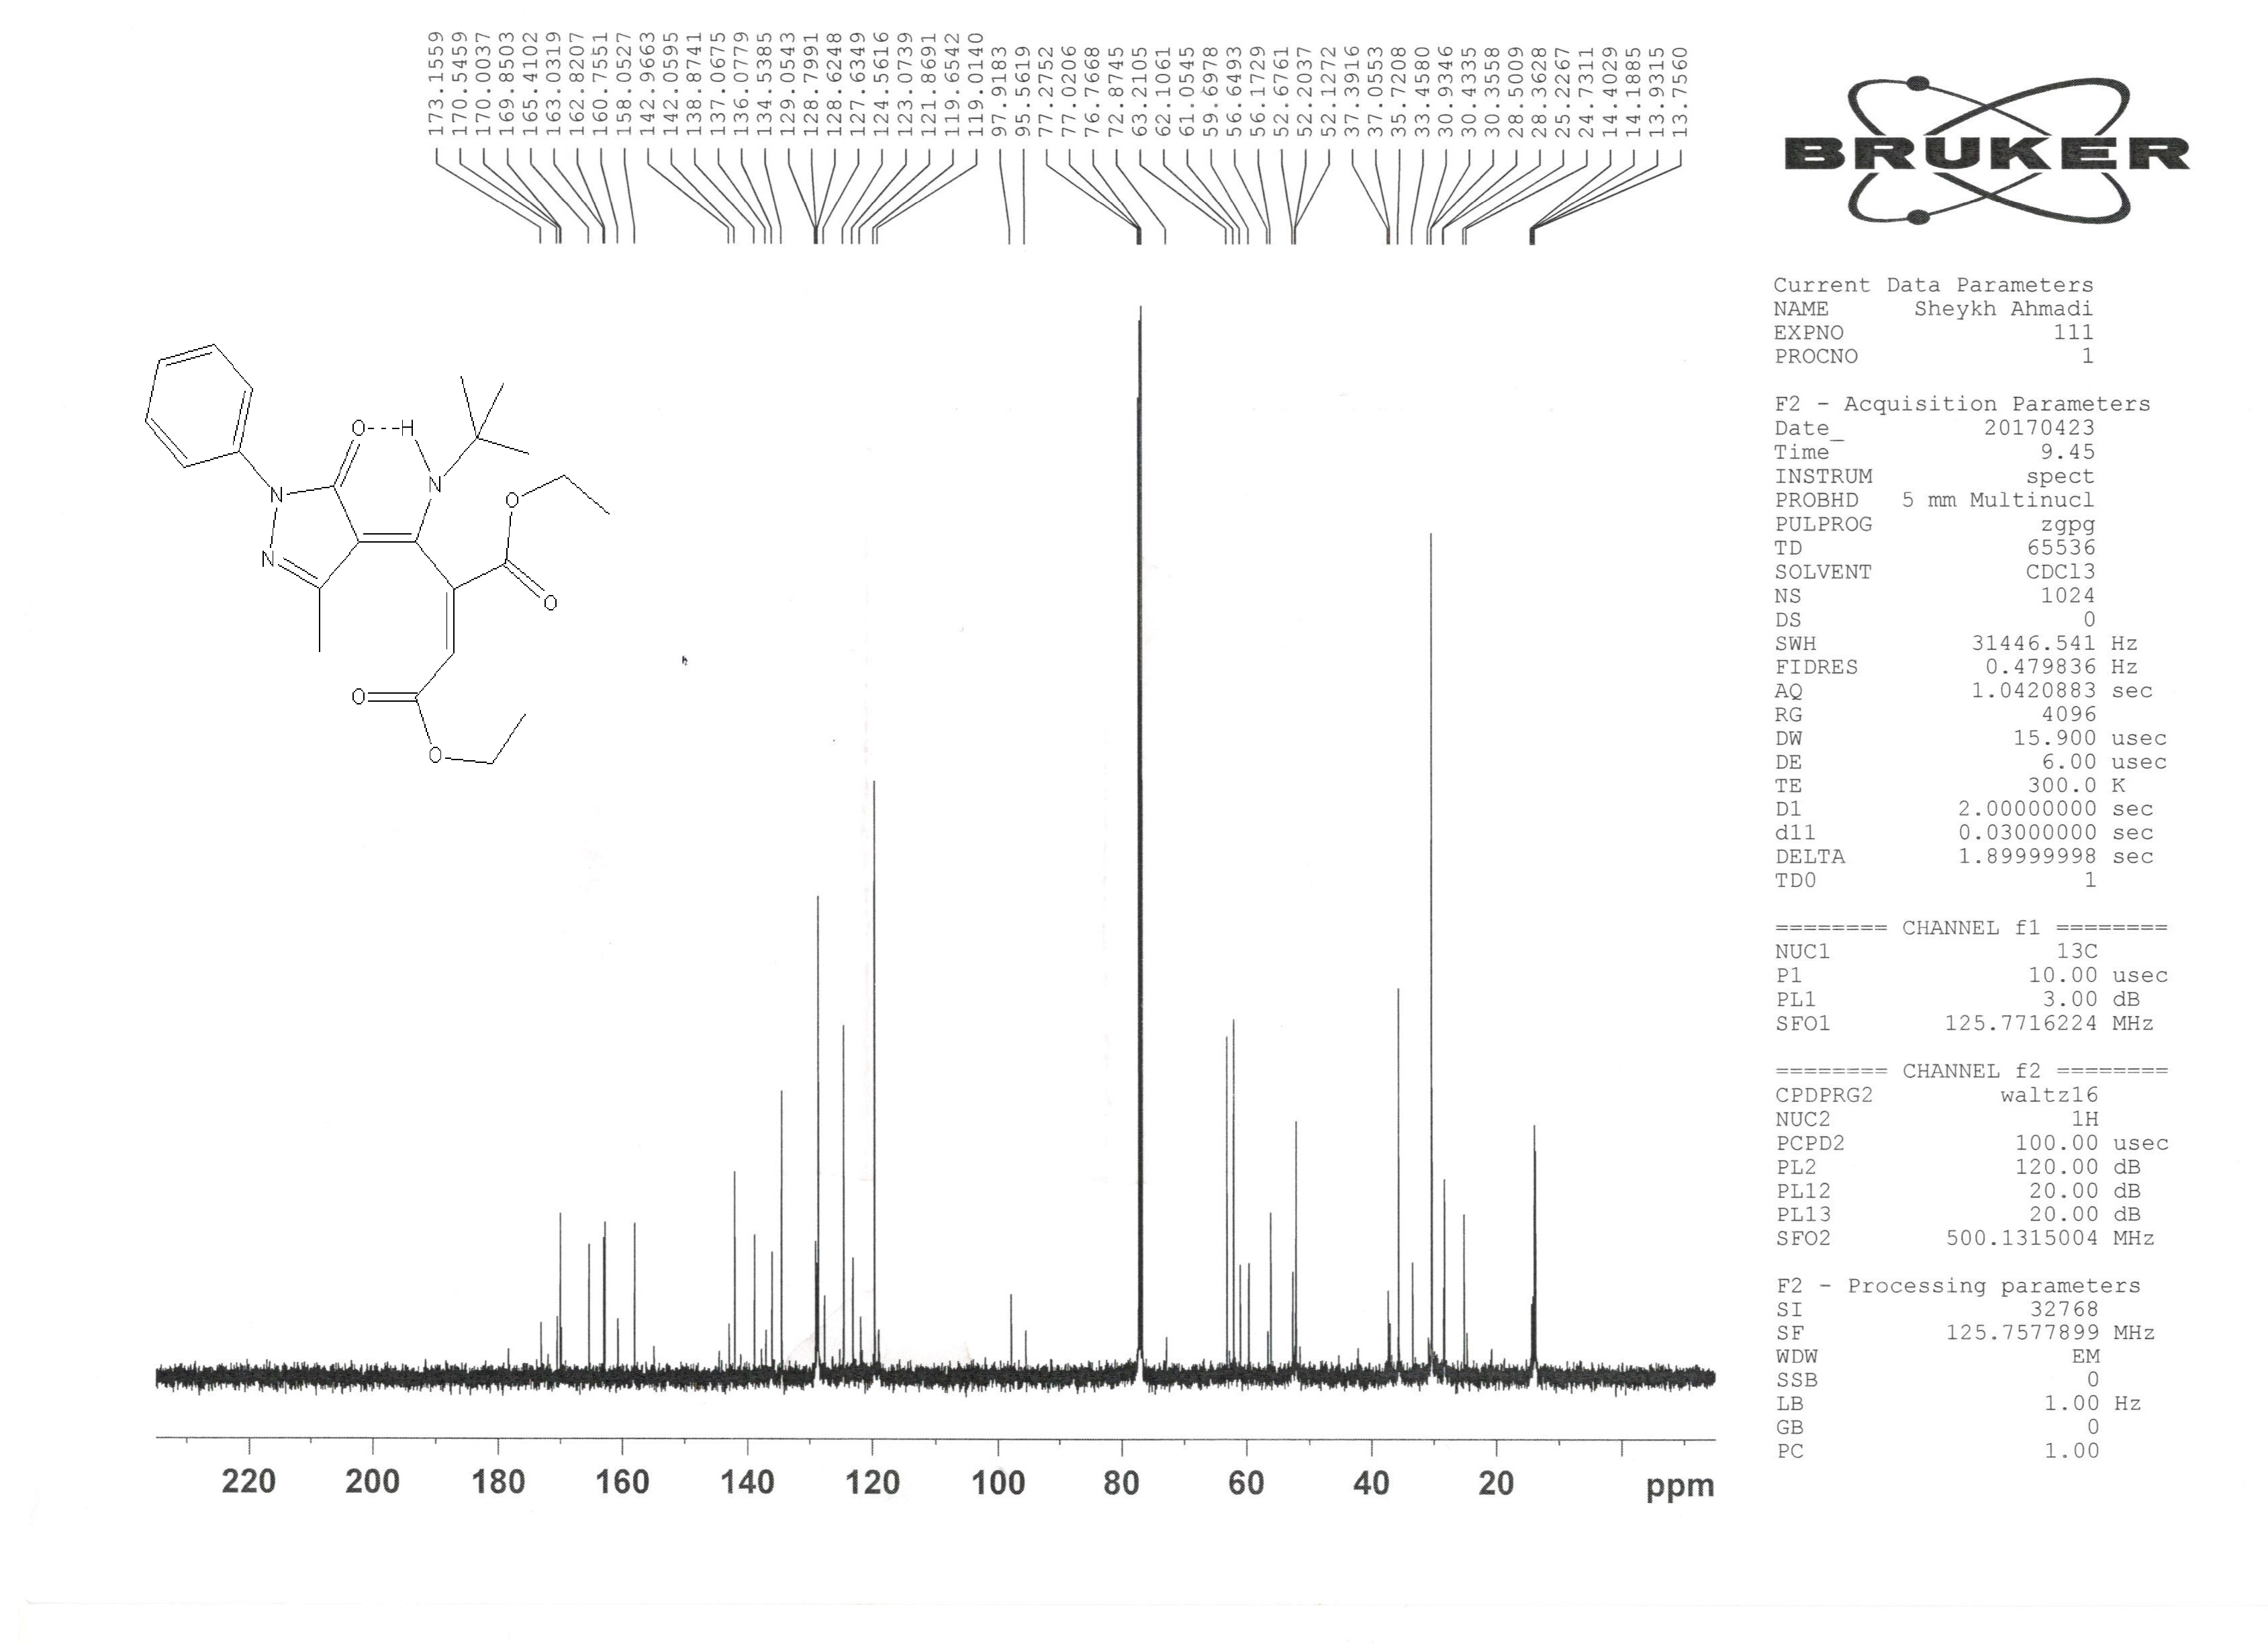


Dimethyl 2-((Z)-(cyclohexylamino)(3-(2-methoxy-2-oxoethyl)-5-oxo-1-phenyl-1,5-dihydro-4H-pyrazol-4-ylidene)methyl)fumarate (**5g**):


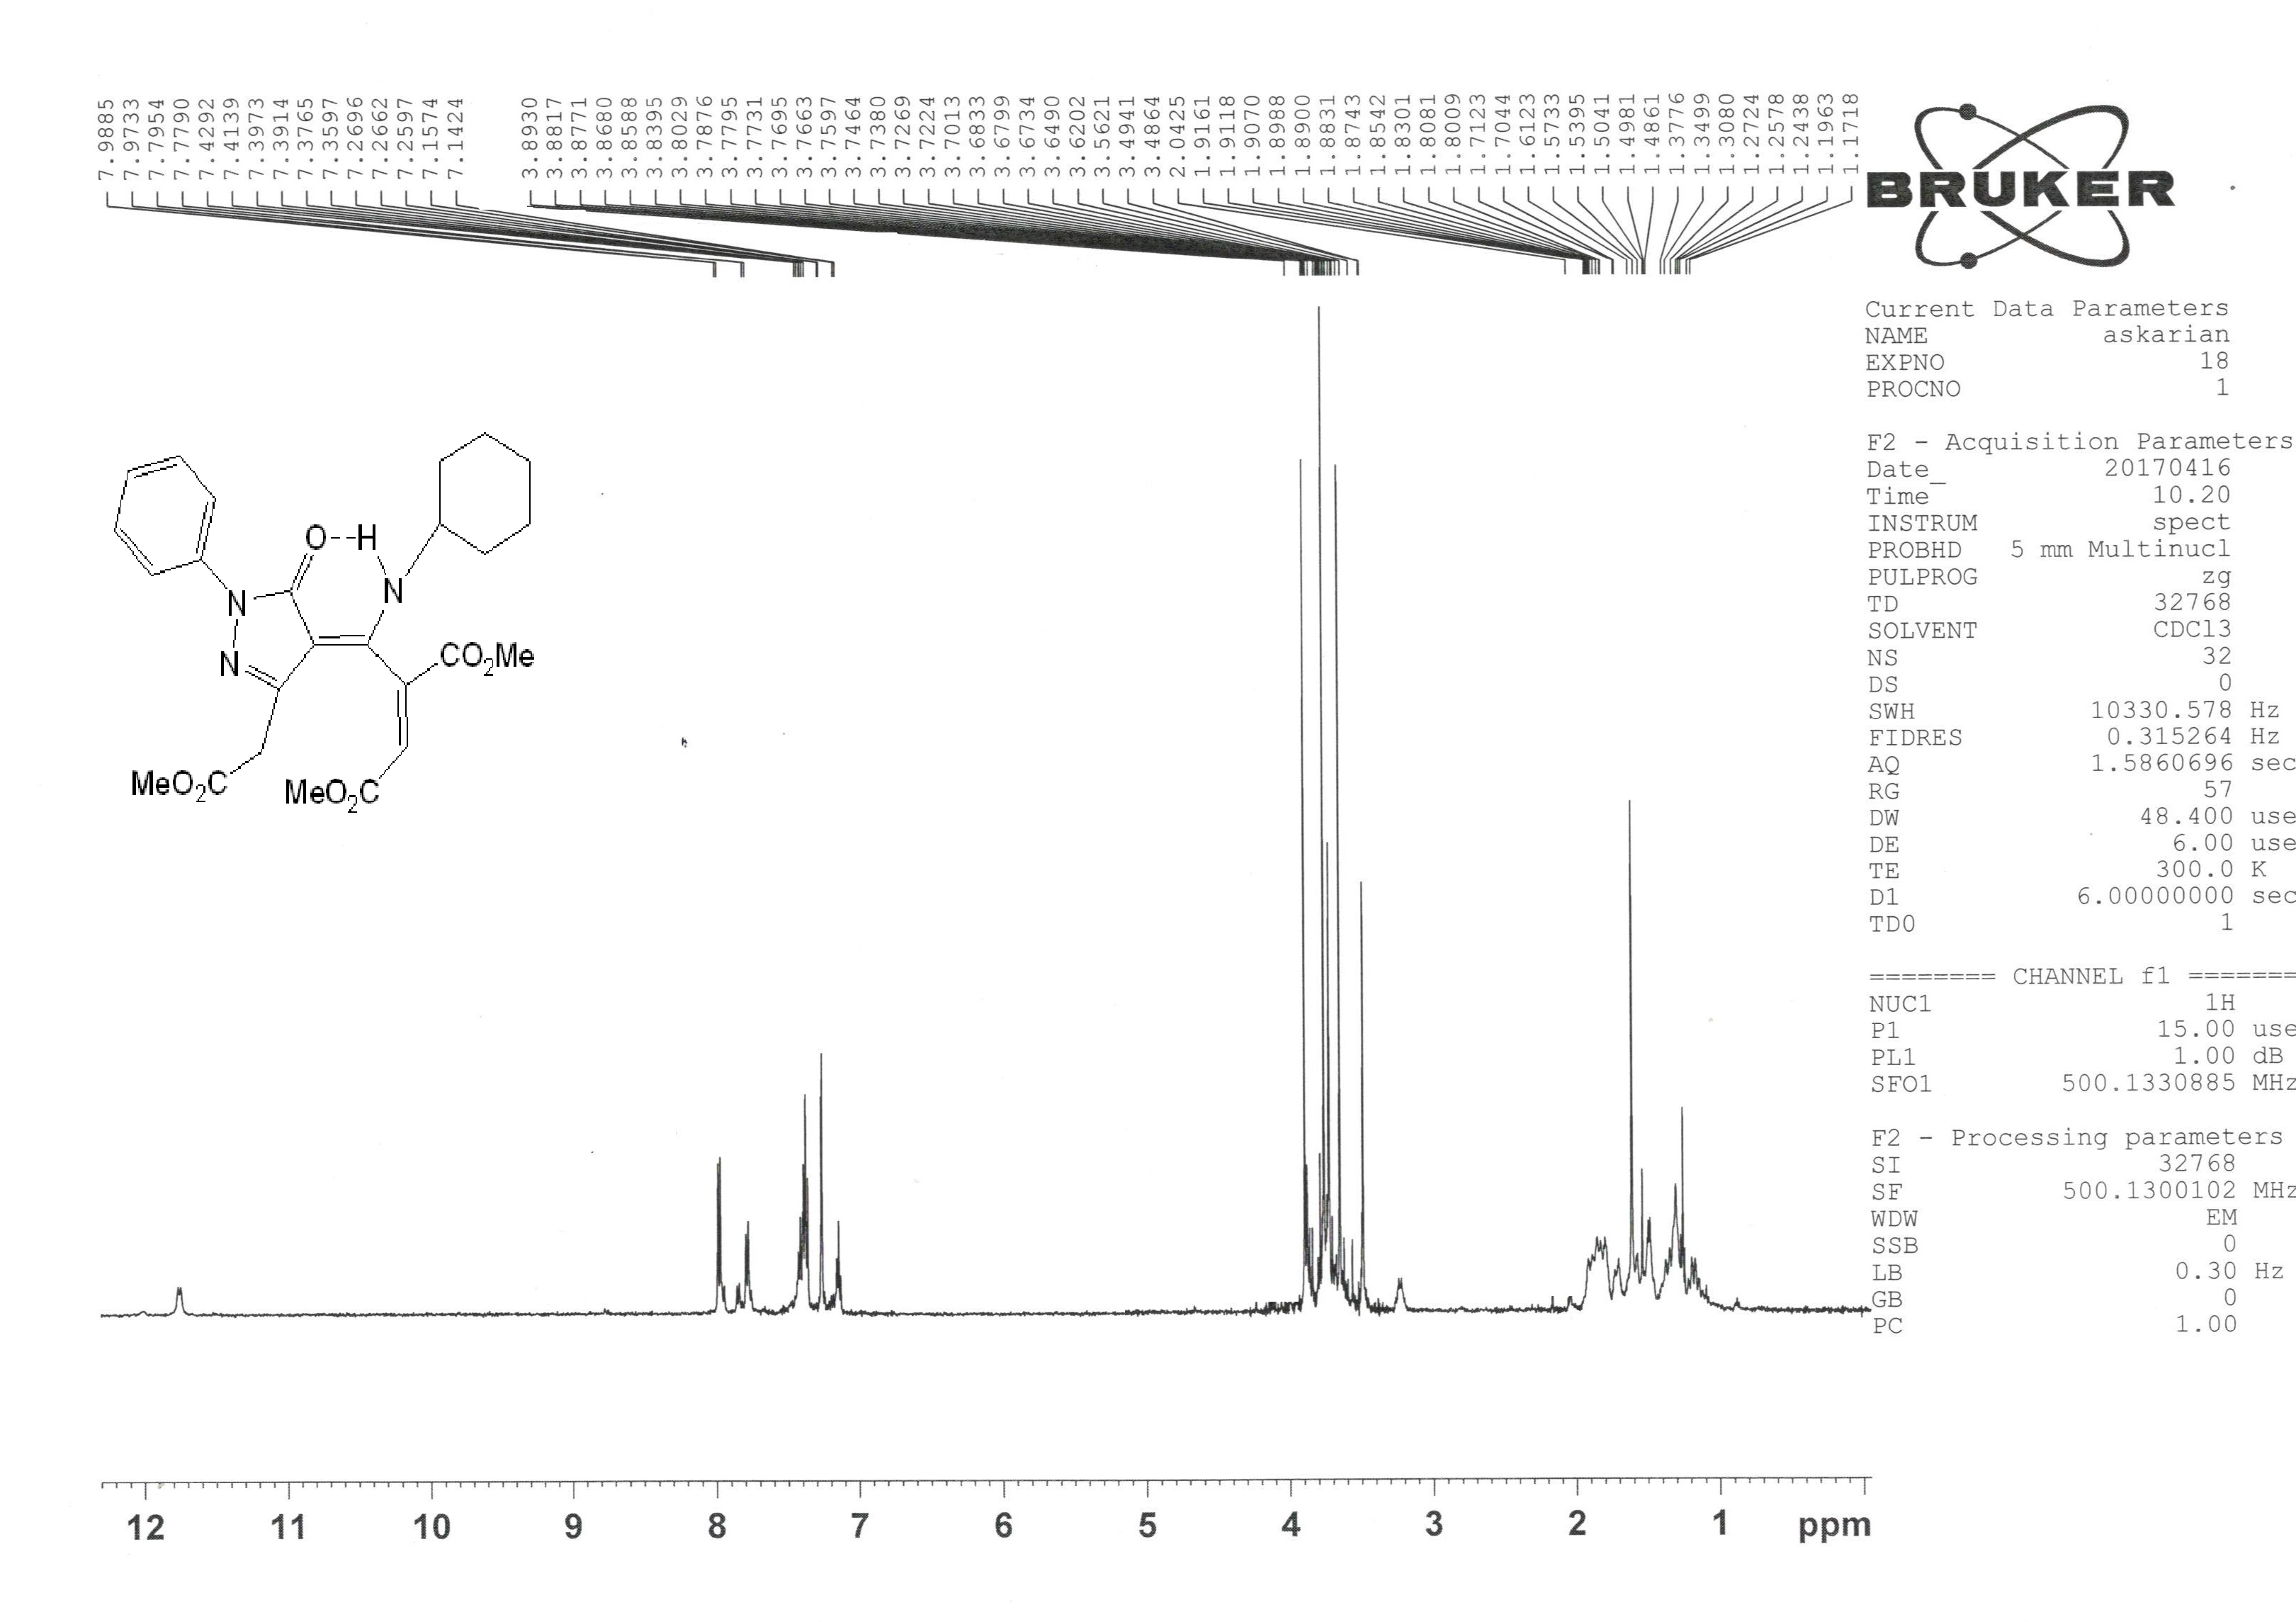

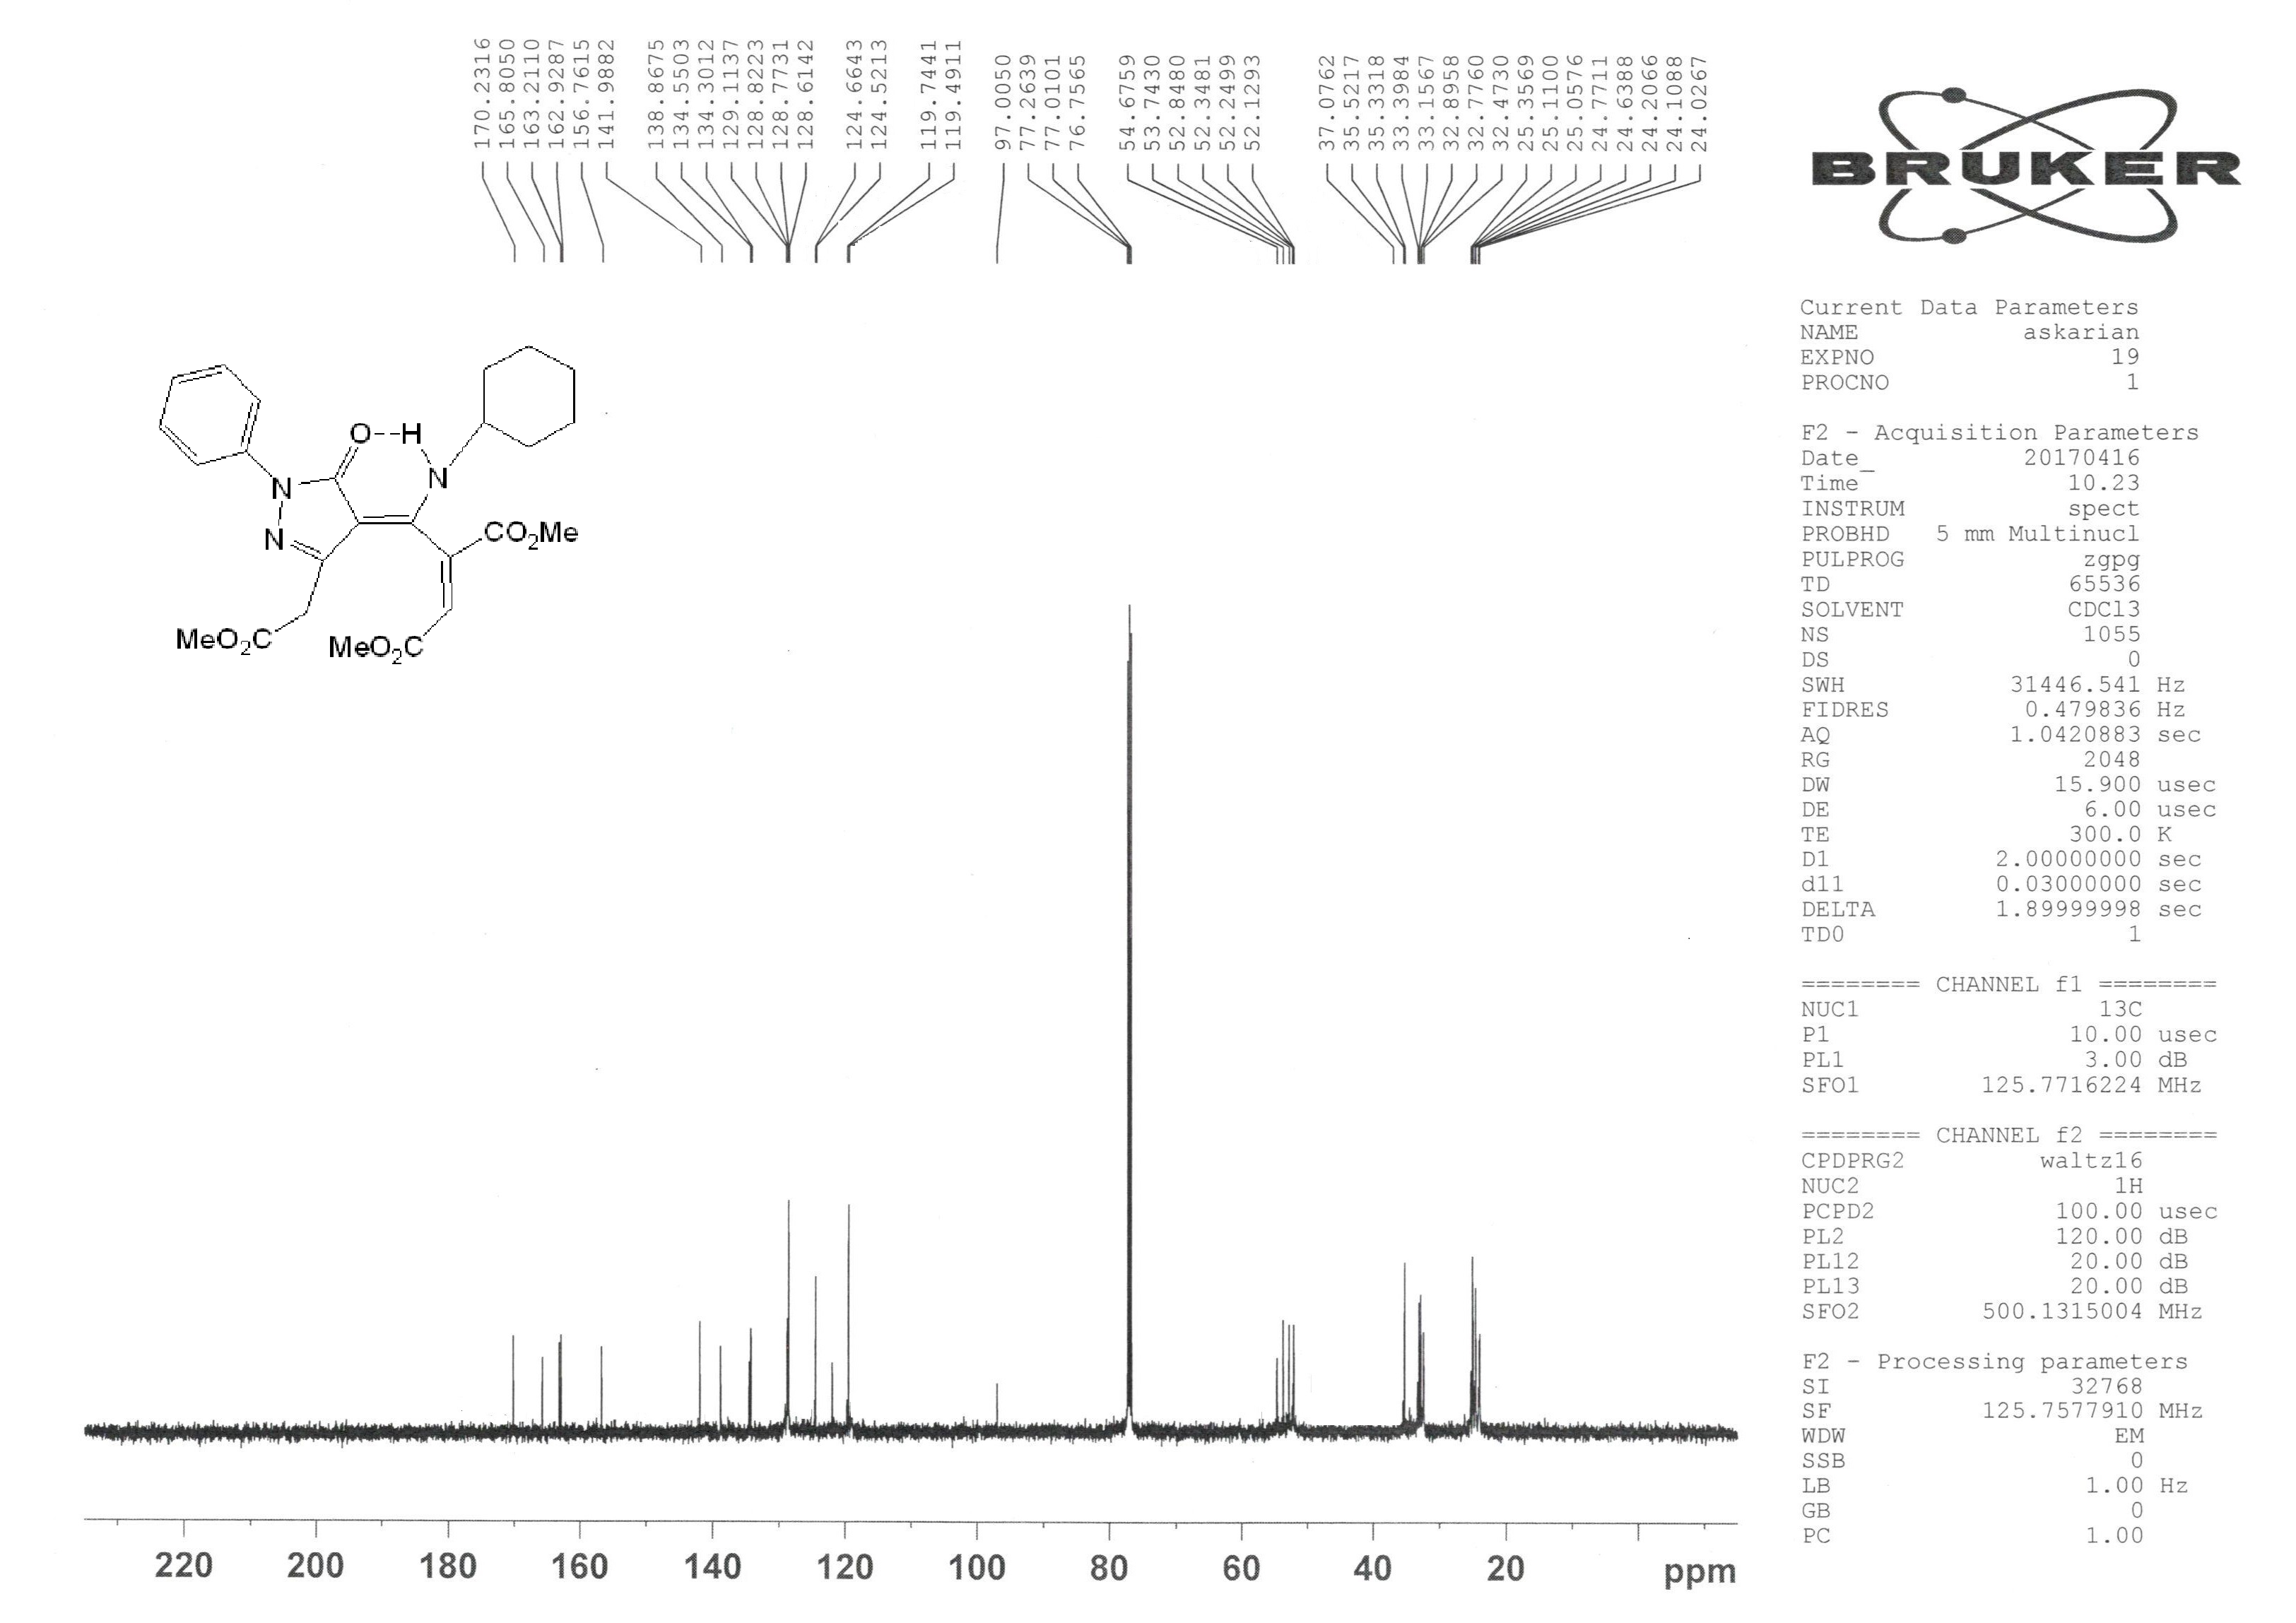


Diethyl 2-((Z)-(cyclohexylamino)(3-(2-methoxy-2-oxoethyl)-5-oxo-1-phenyl-1,5-dihydro-4H-pyrazol-4-ylidene)methyl)fumarate (**5h**):


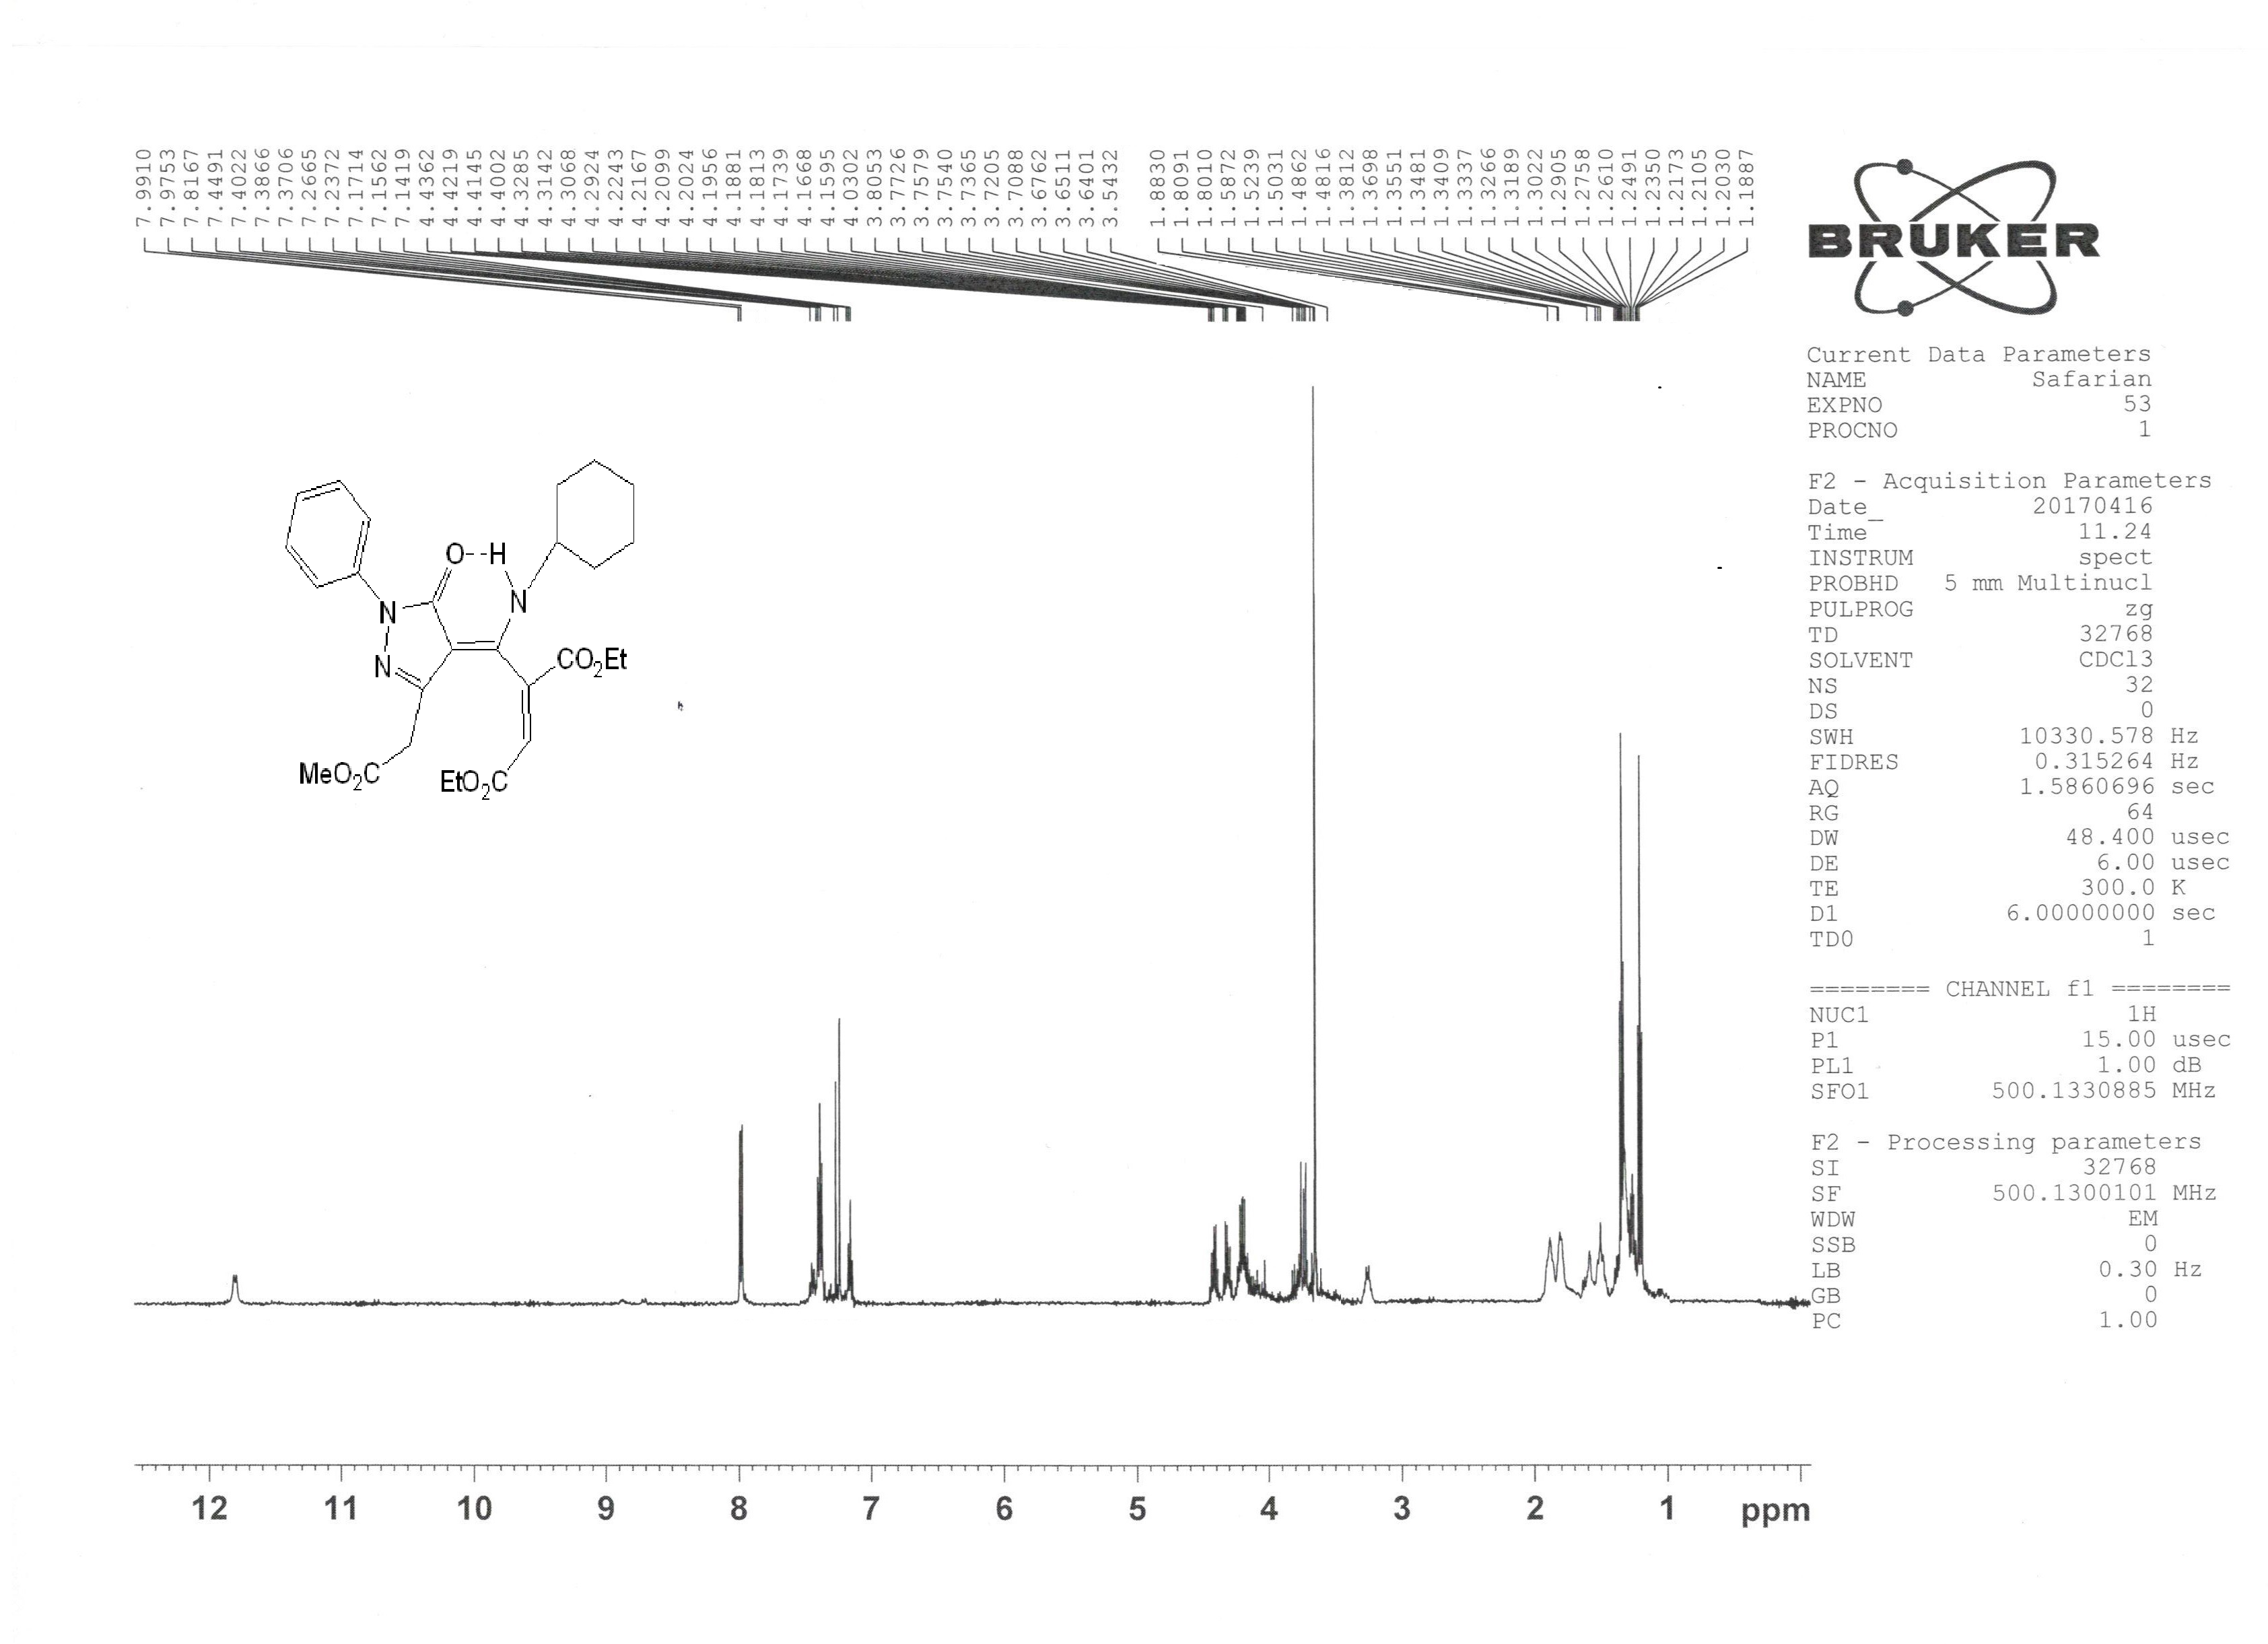


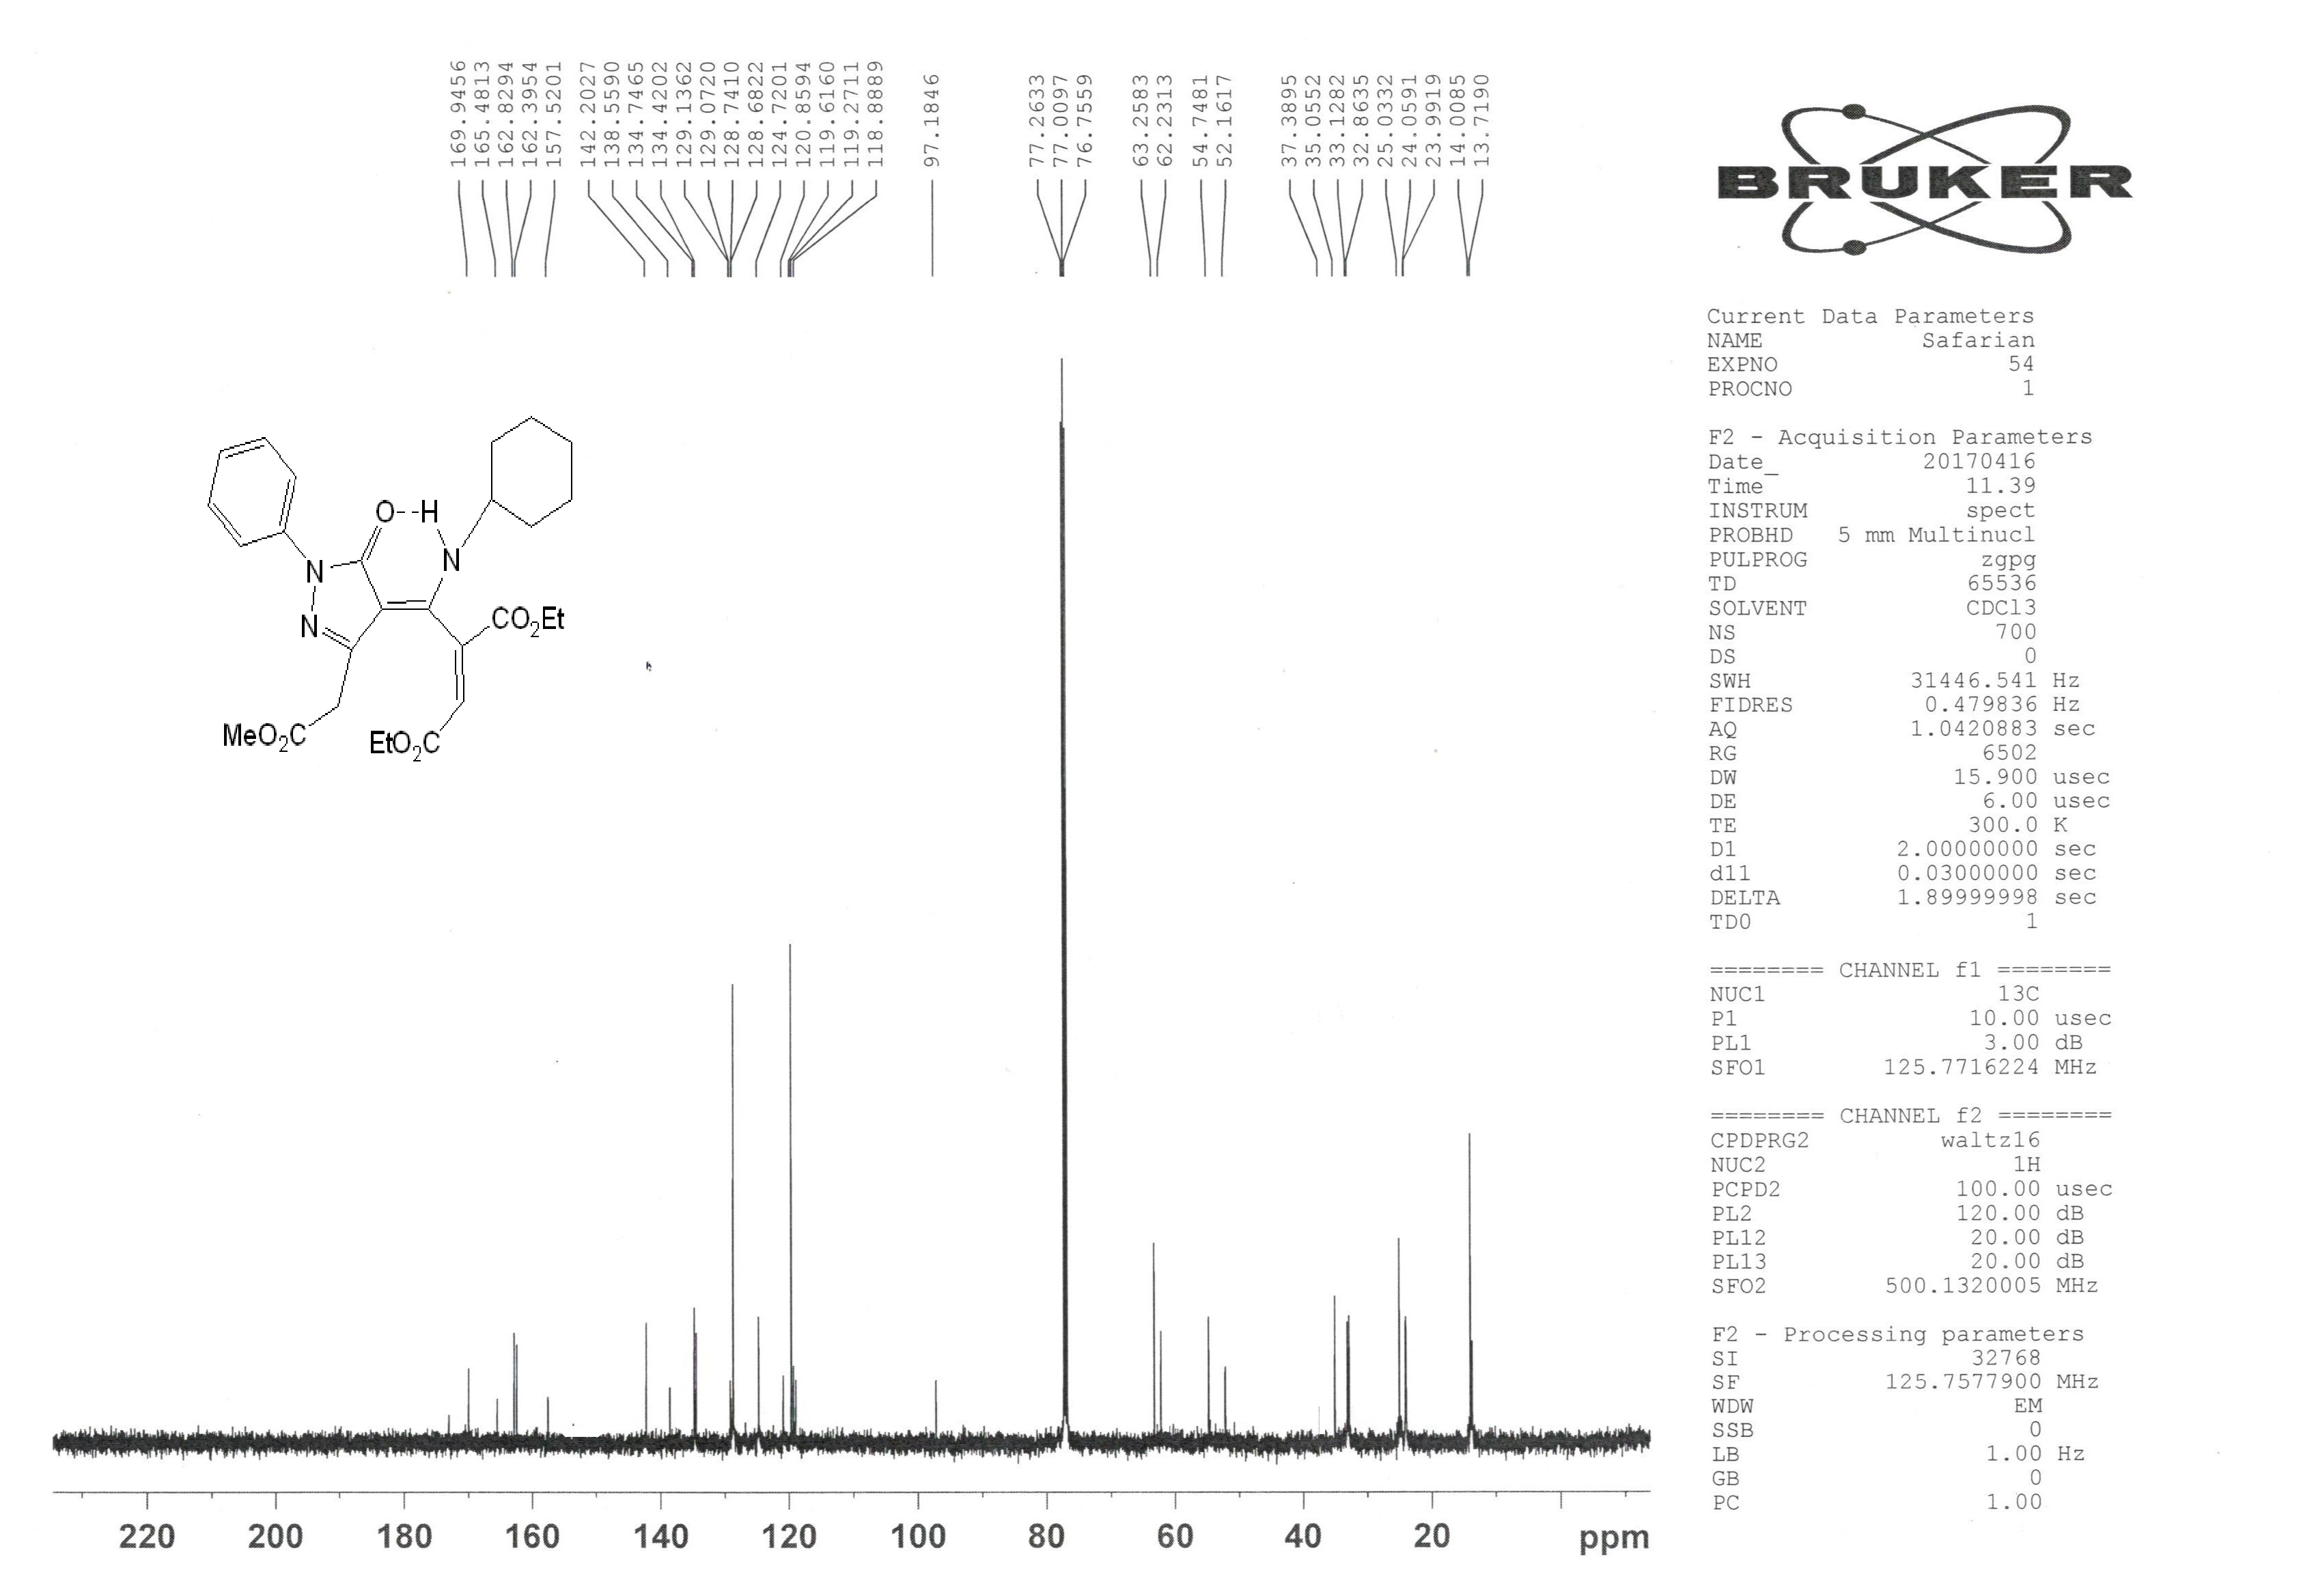


Dimethyl 2-((Z)-(tert-butylamino)(3-methyl-1-(4-nitrophenyl)-5-oxo-1,5-dihydro-4H-pyrazol-4-ylidene)methyl)fumarate (**5i**):


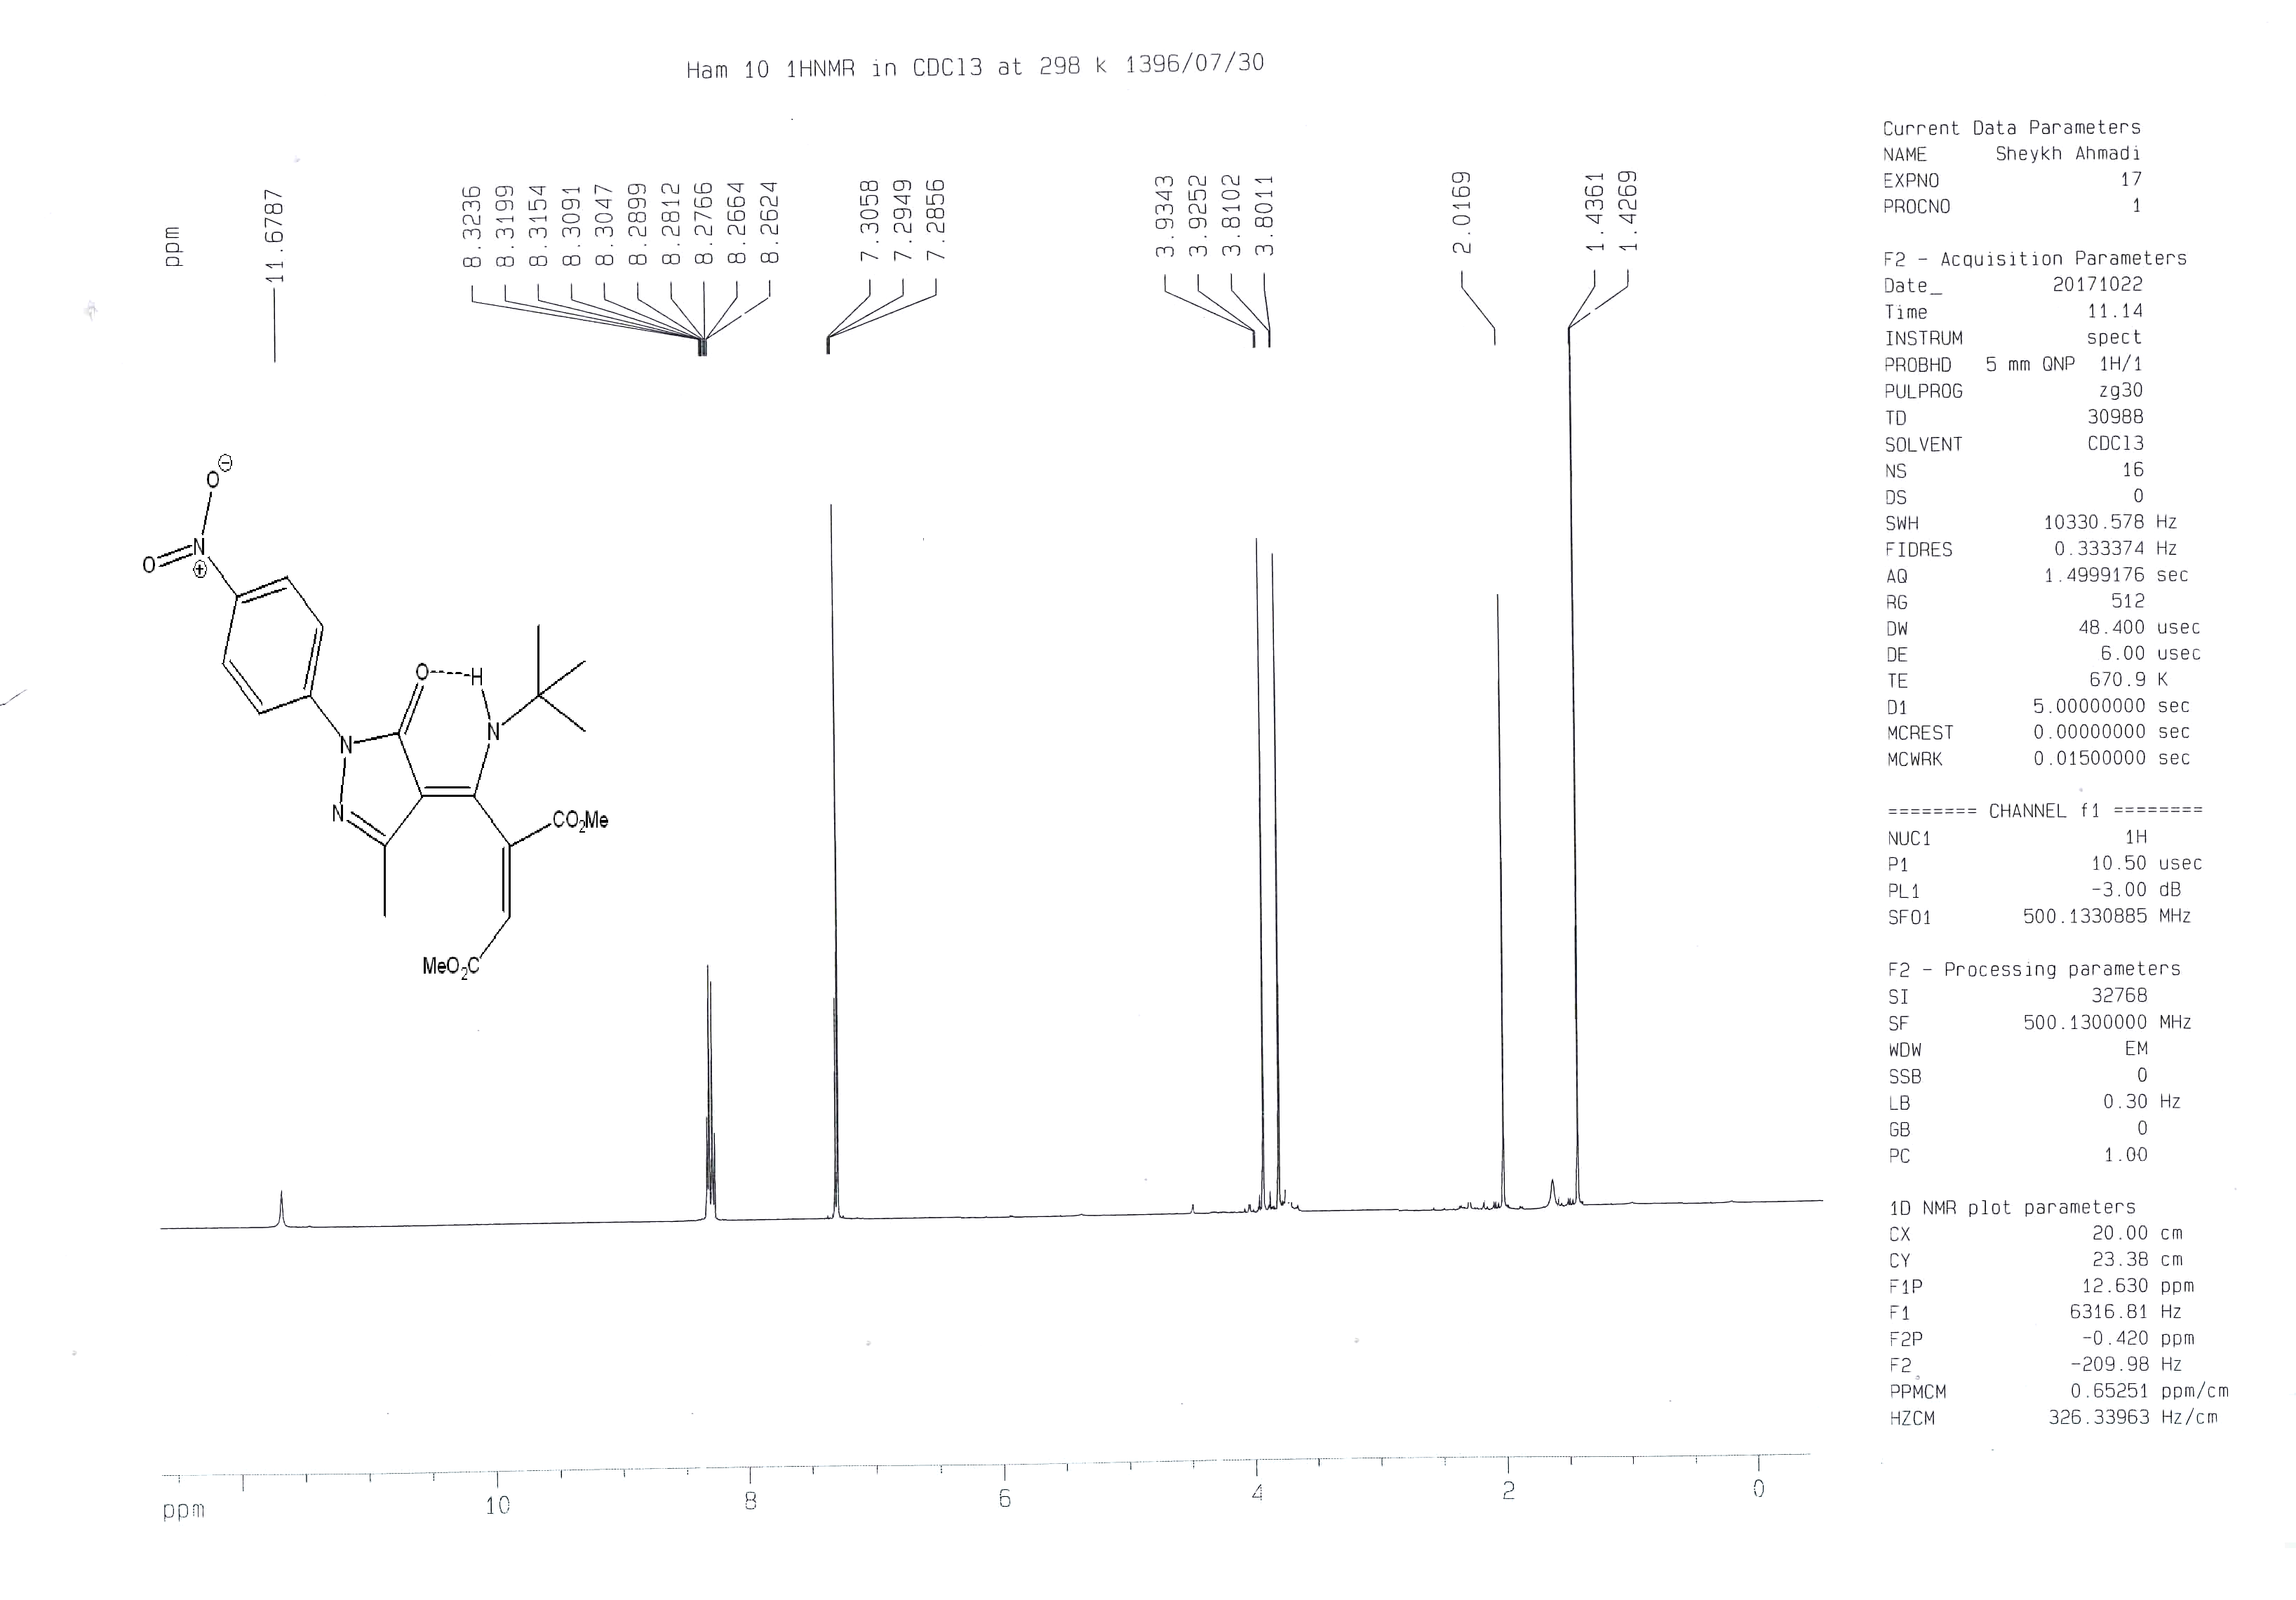


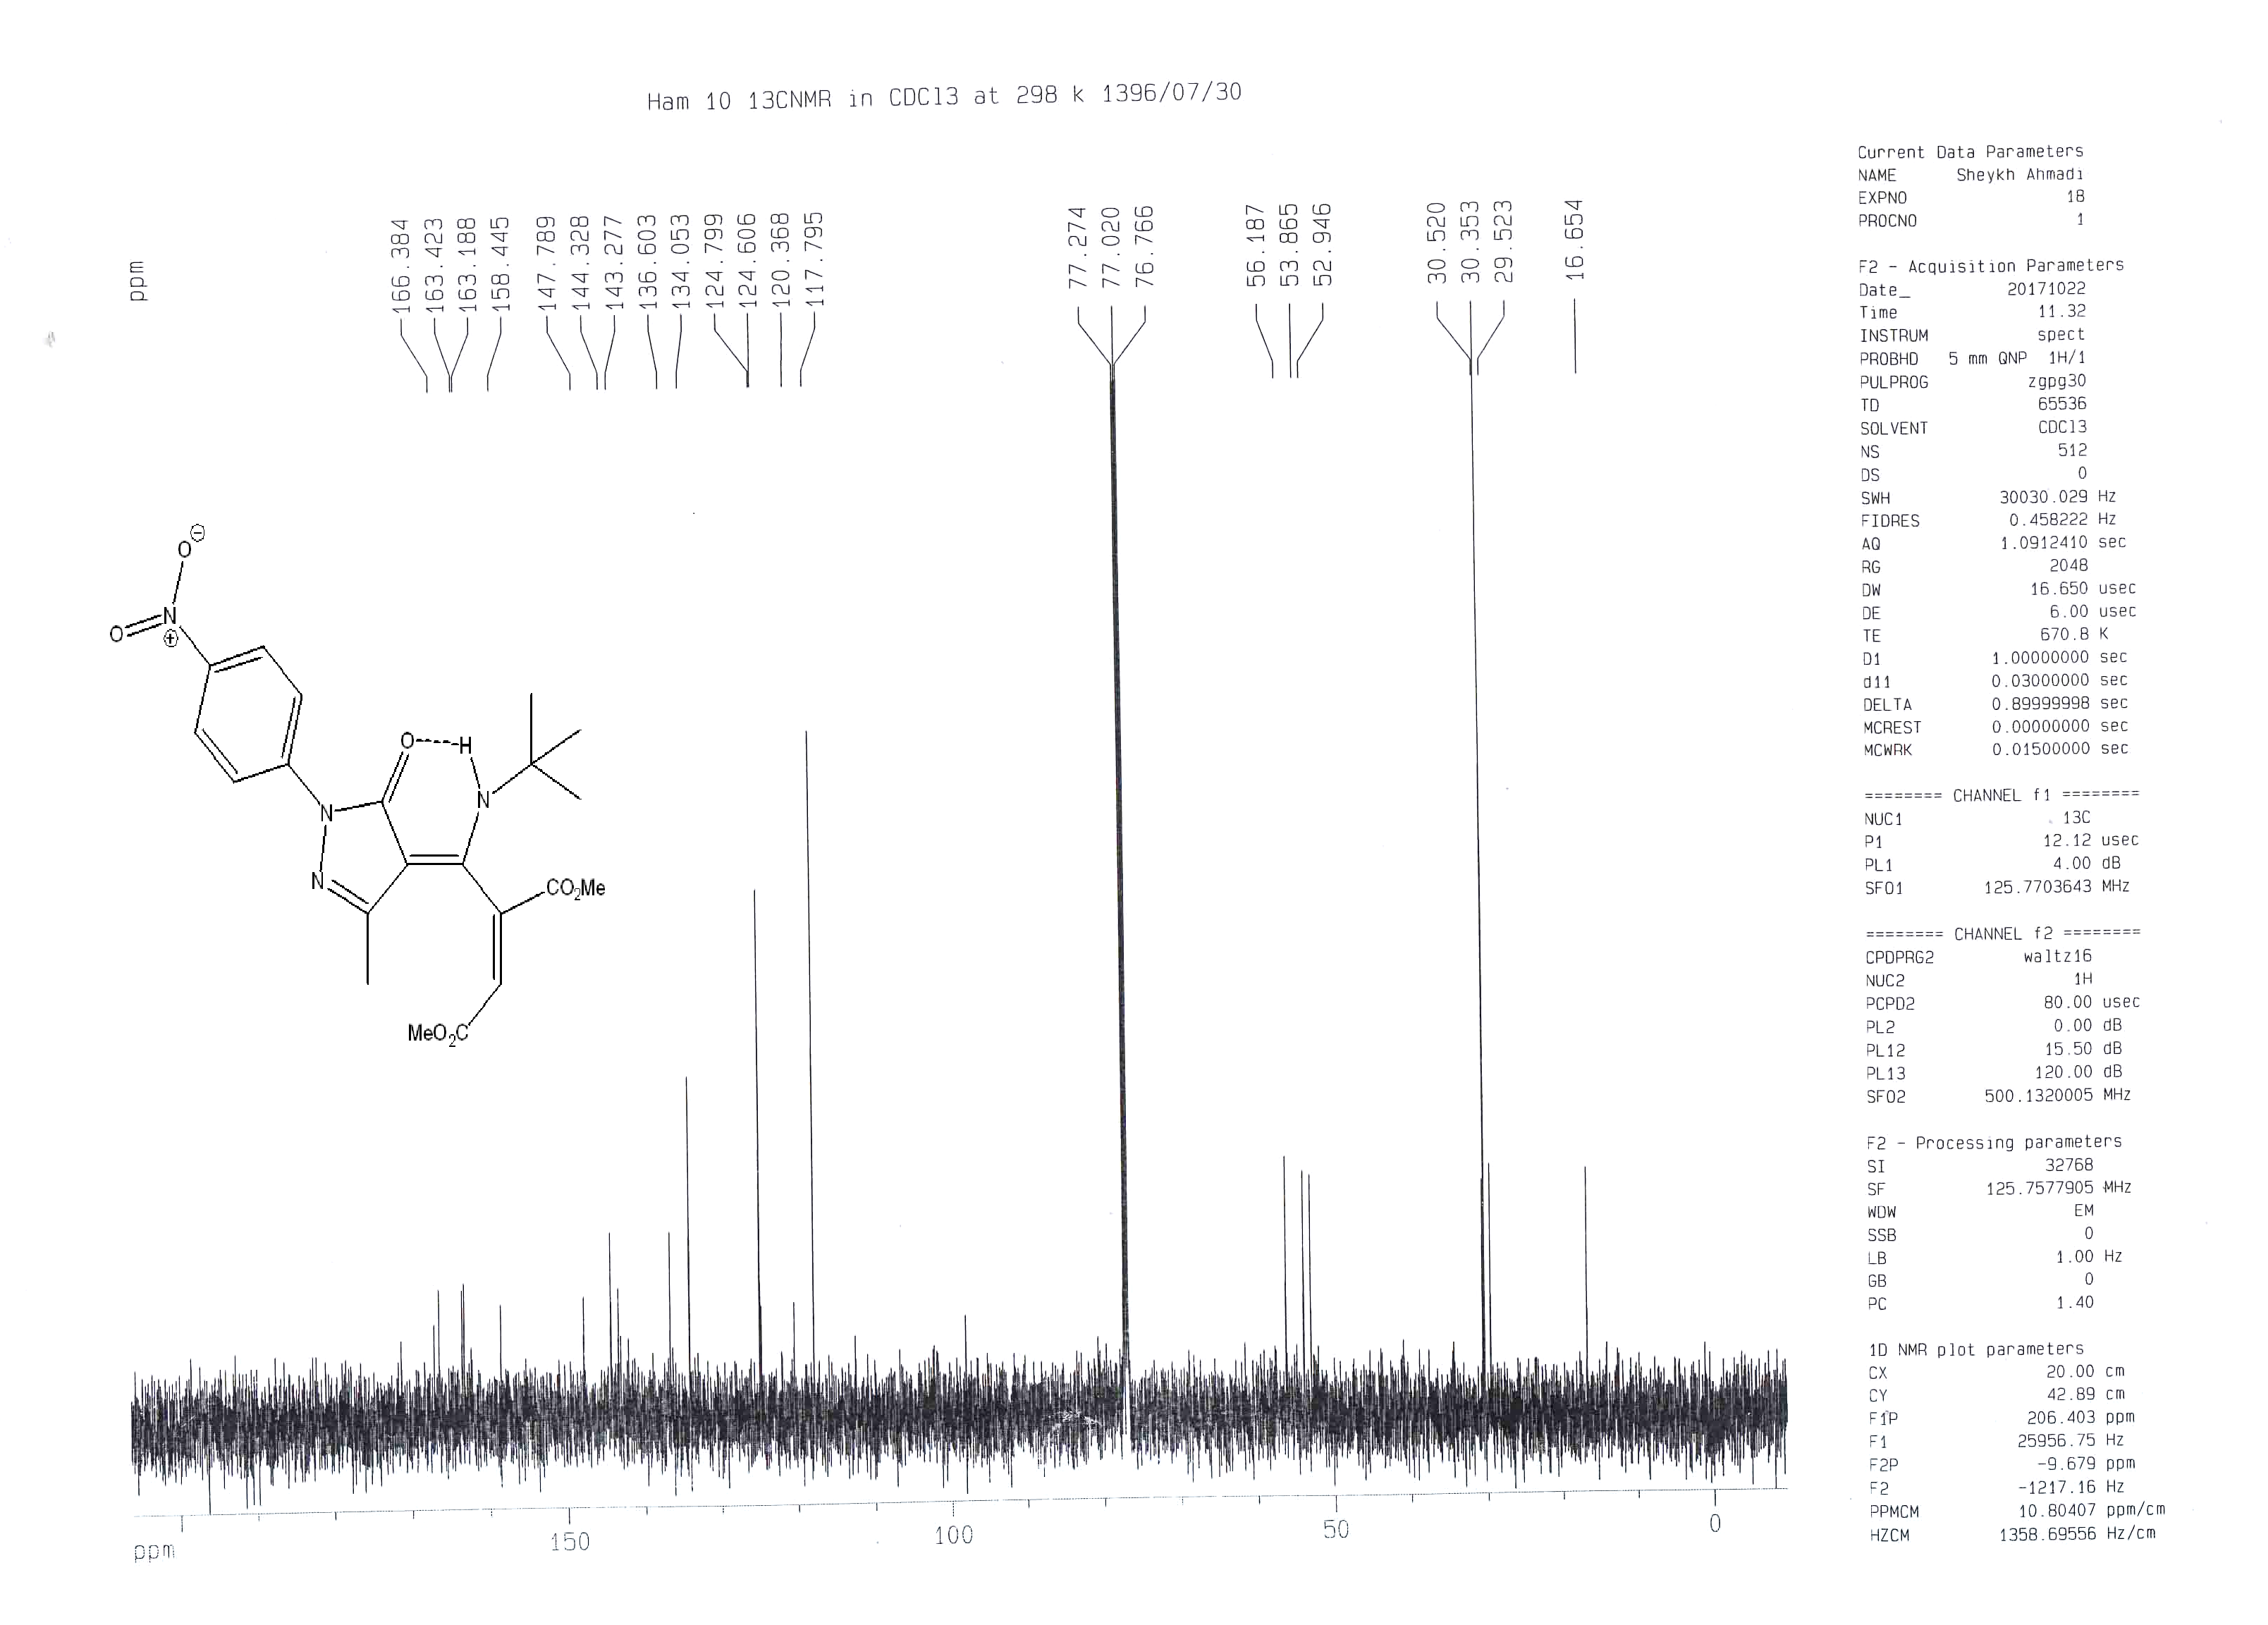


Diethyl 2-((Z)-(tert-butylamino)(3-methyl-1-(4-nitrophenyl)-5-oxo-1,5-dihydro-4H-pyrazol-4-ylidene)methyl)fumarate (**5j**):


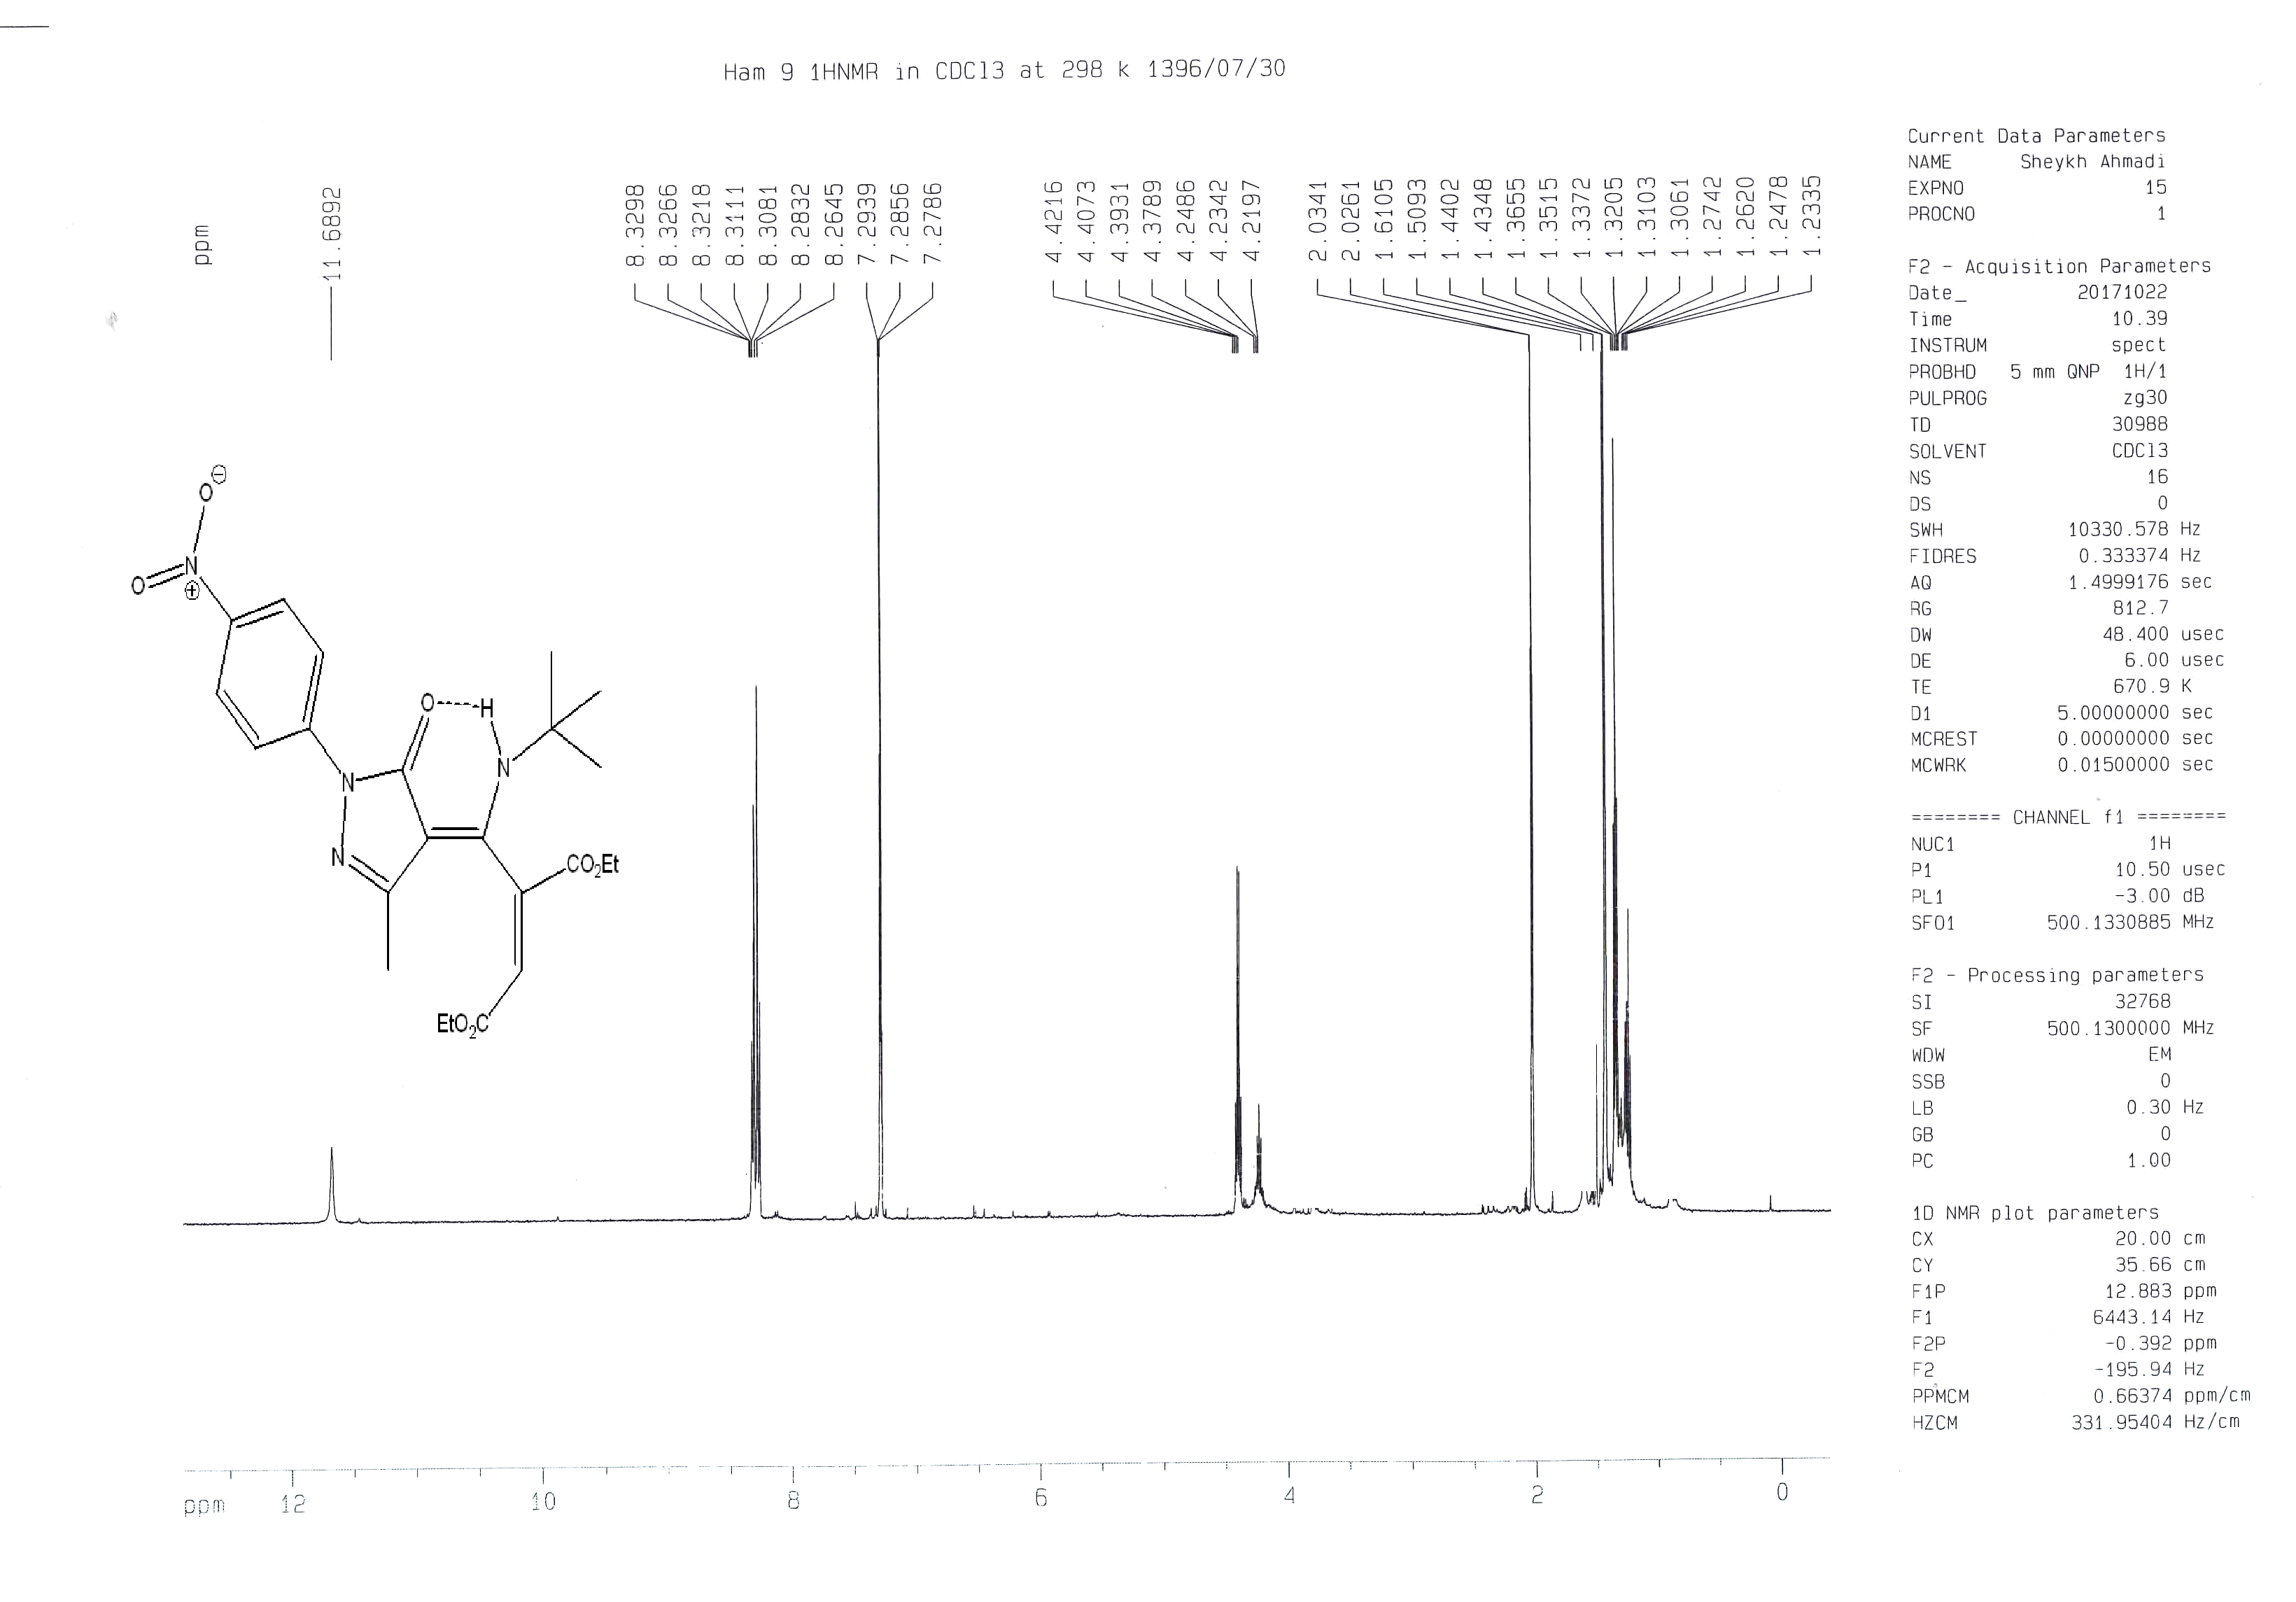


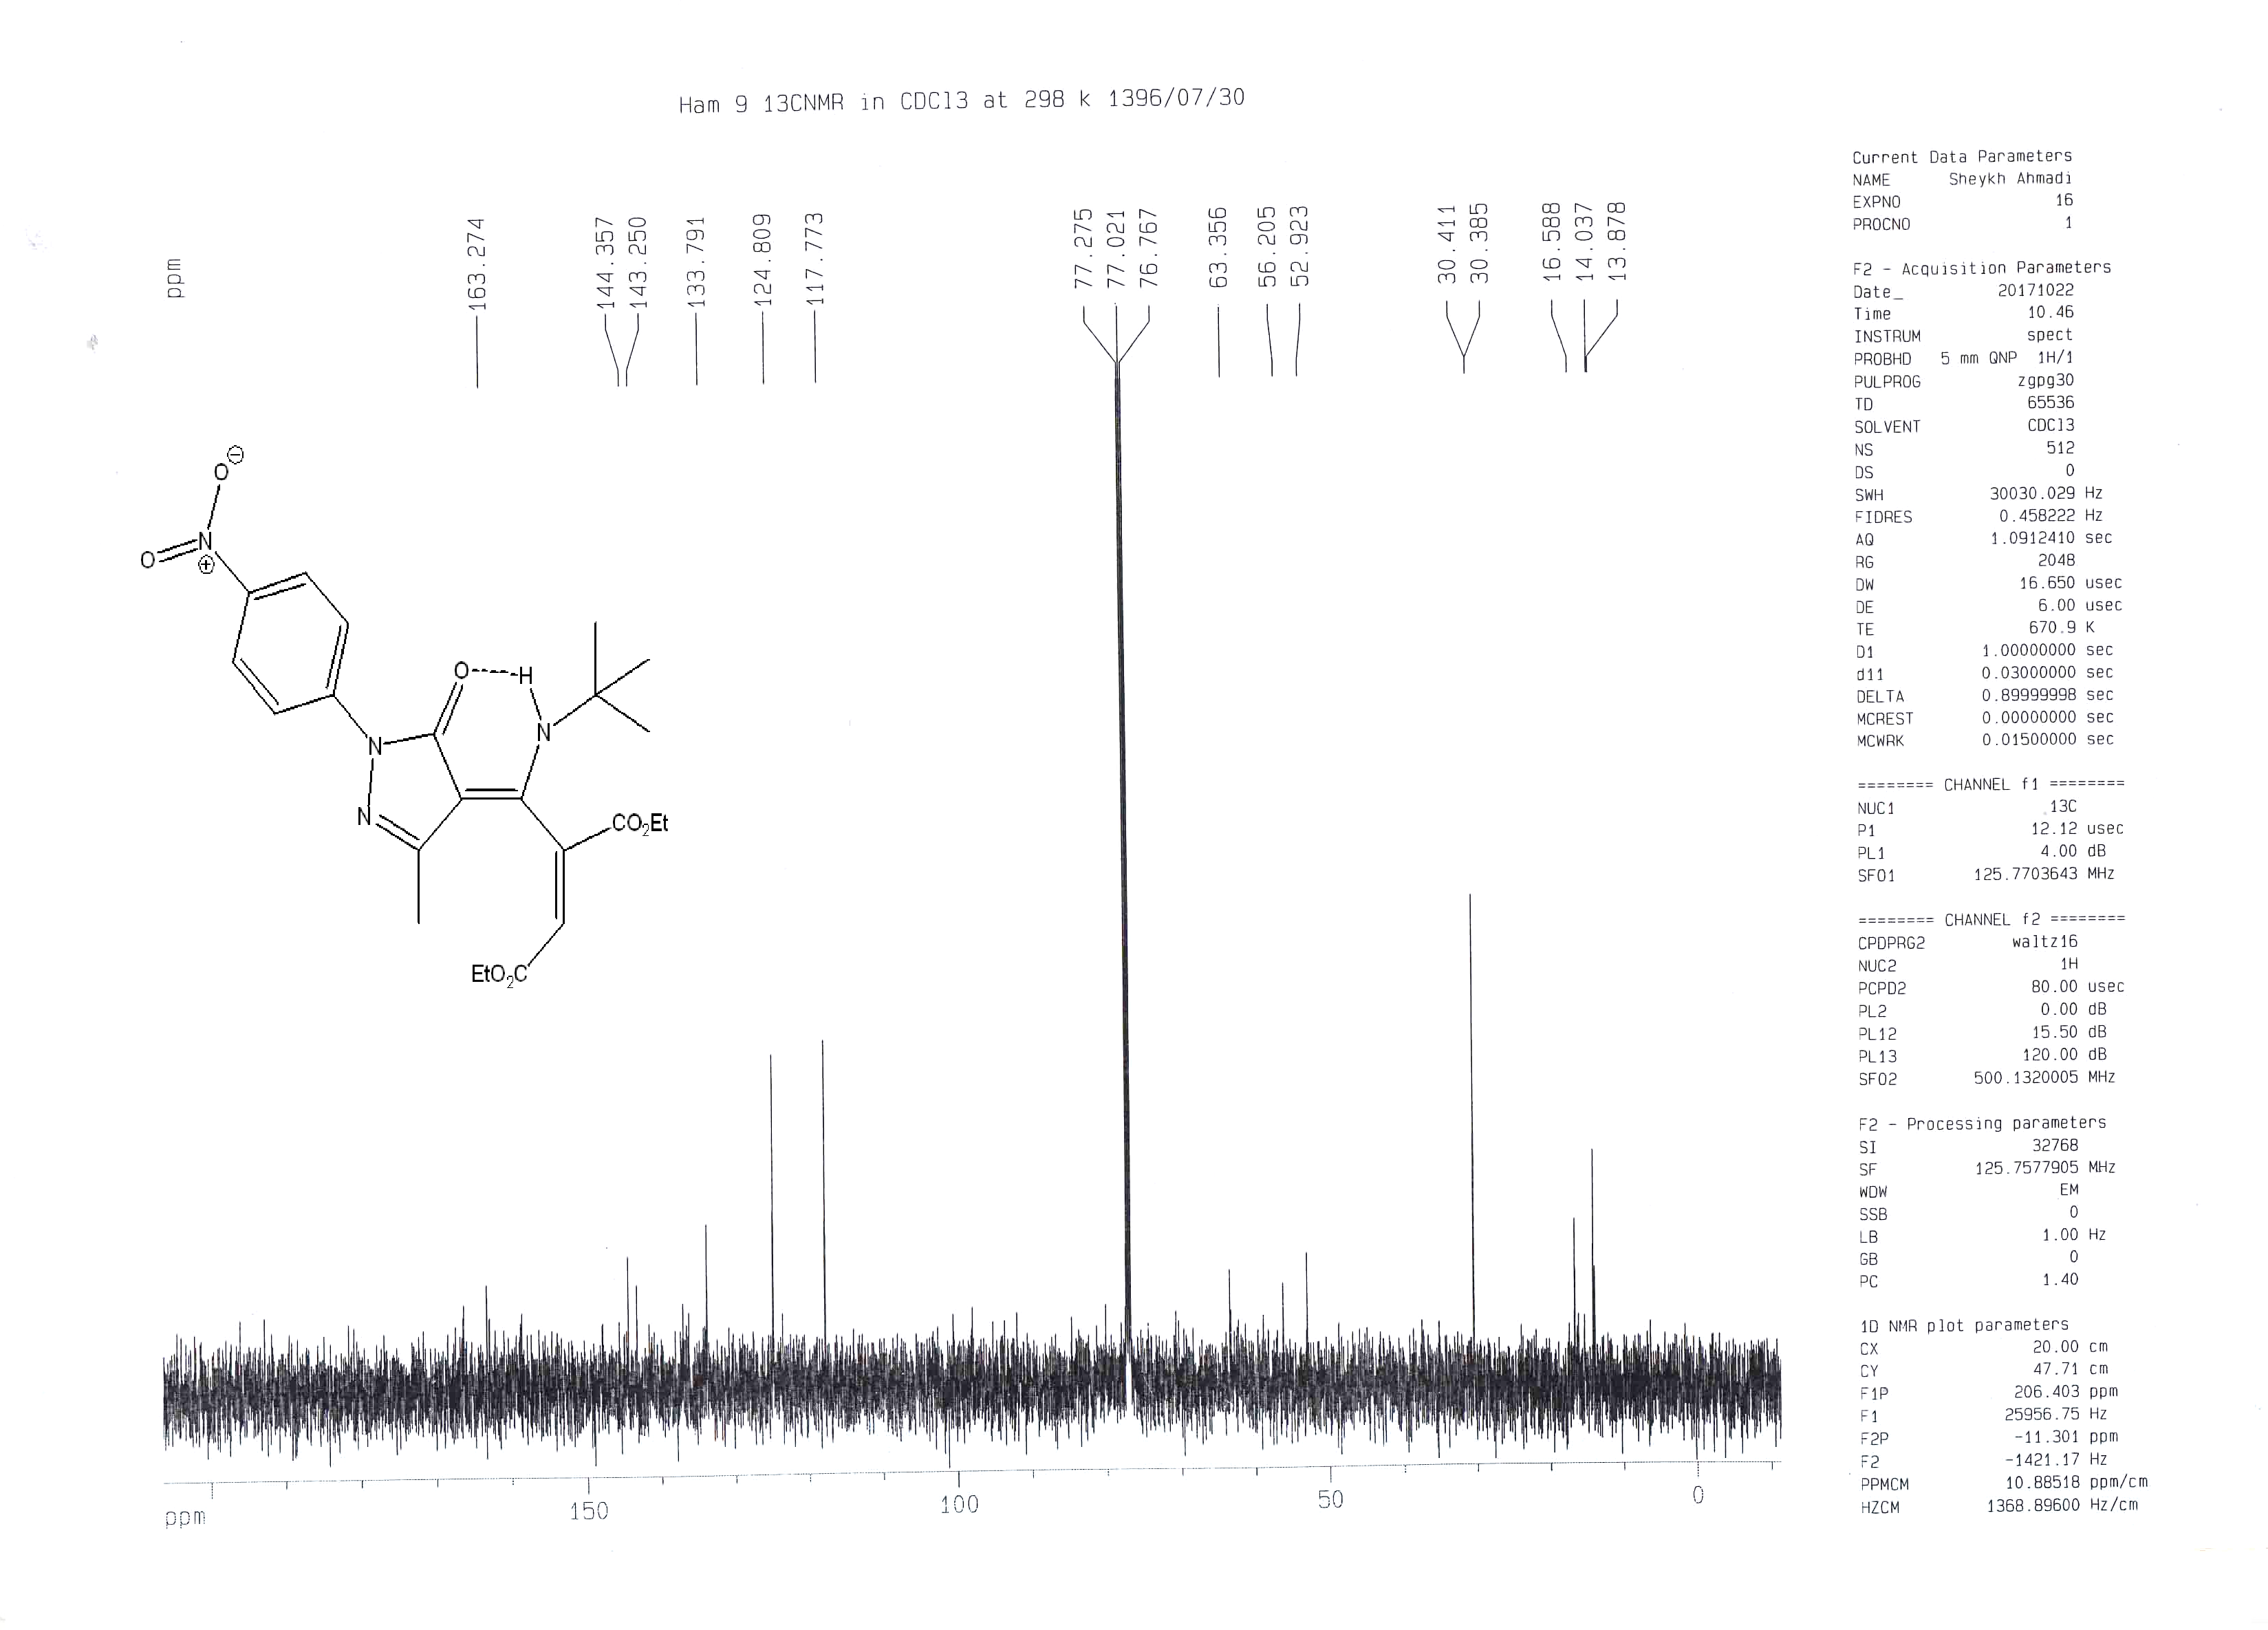


Dimethyl 2-((Z)-(cyclohexylamino)(3-methyl-1-(4-nitrophenyl)-5-oxo-1,5-dihydro-4H-pyrazol-4-ylidene)methyl)fumarate (**5k**):


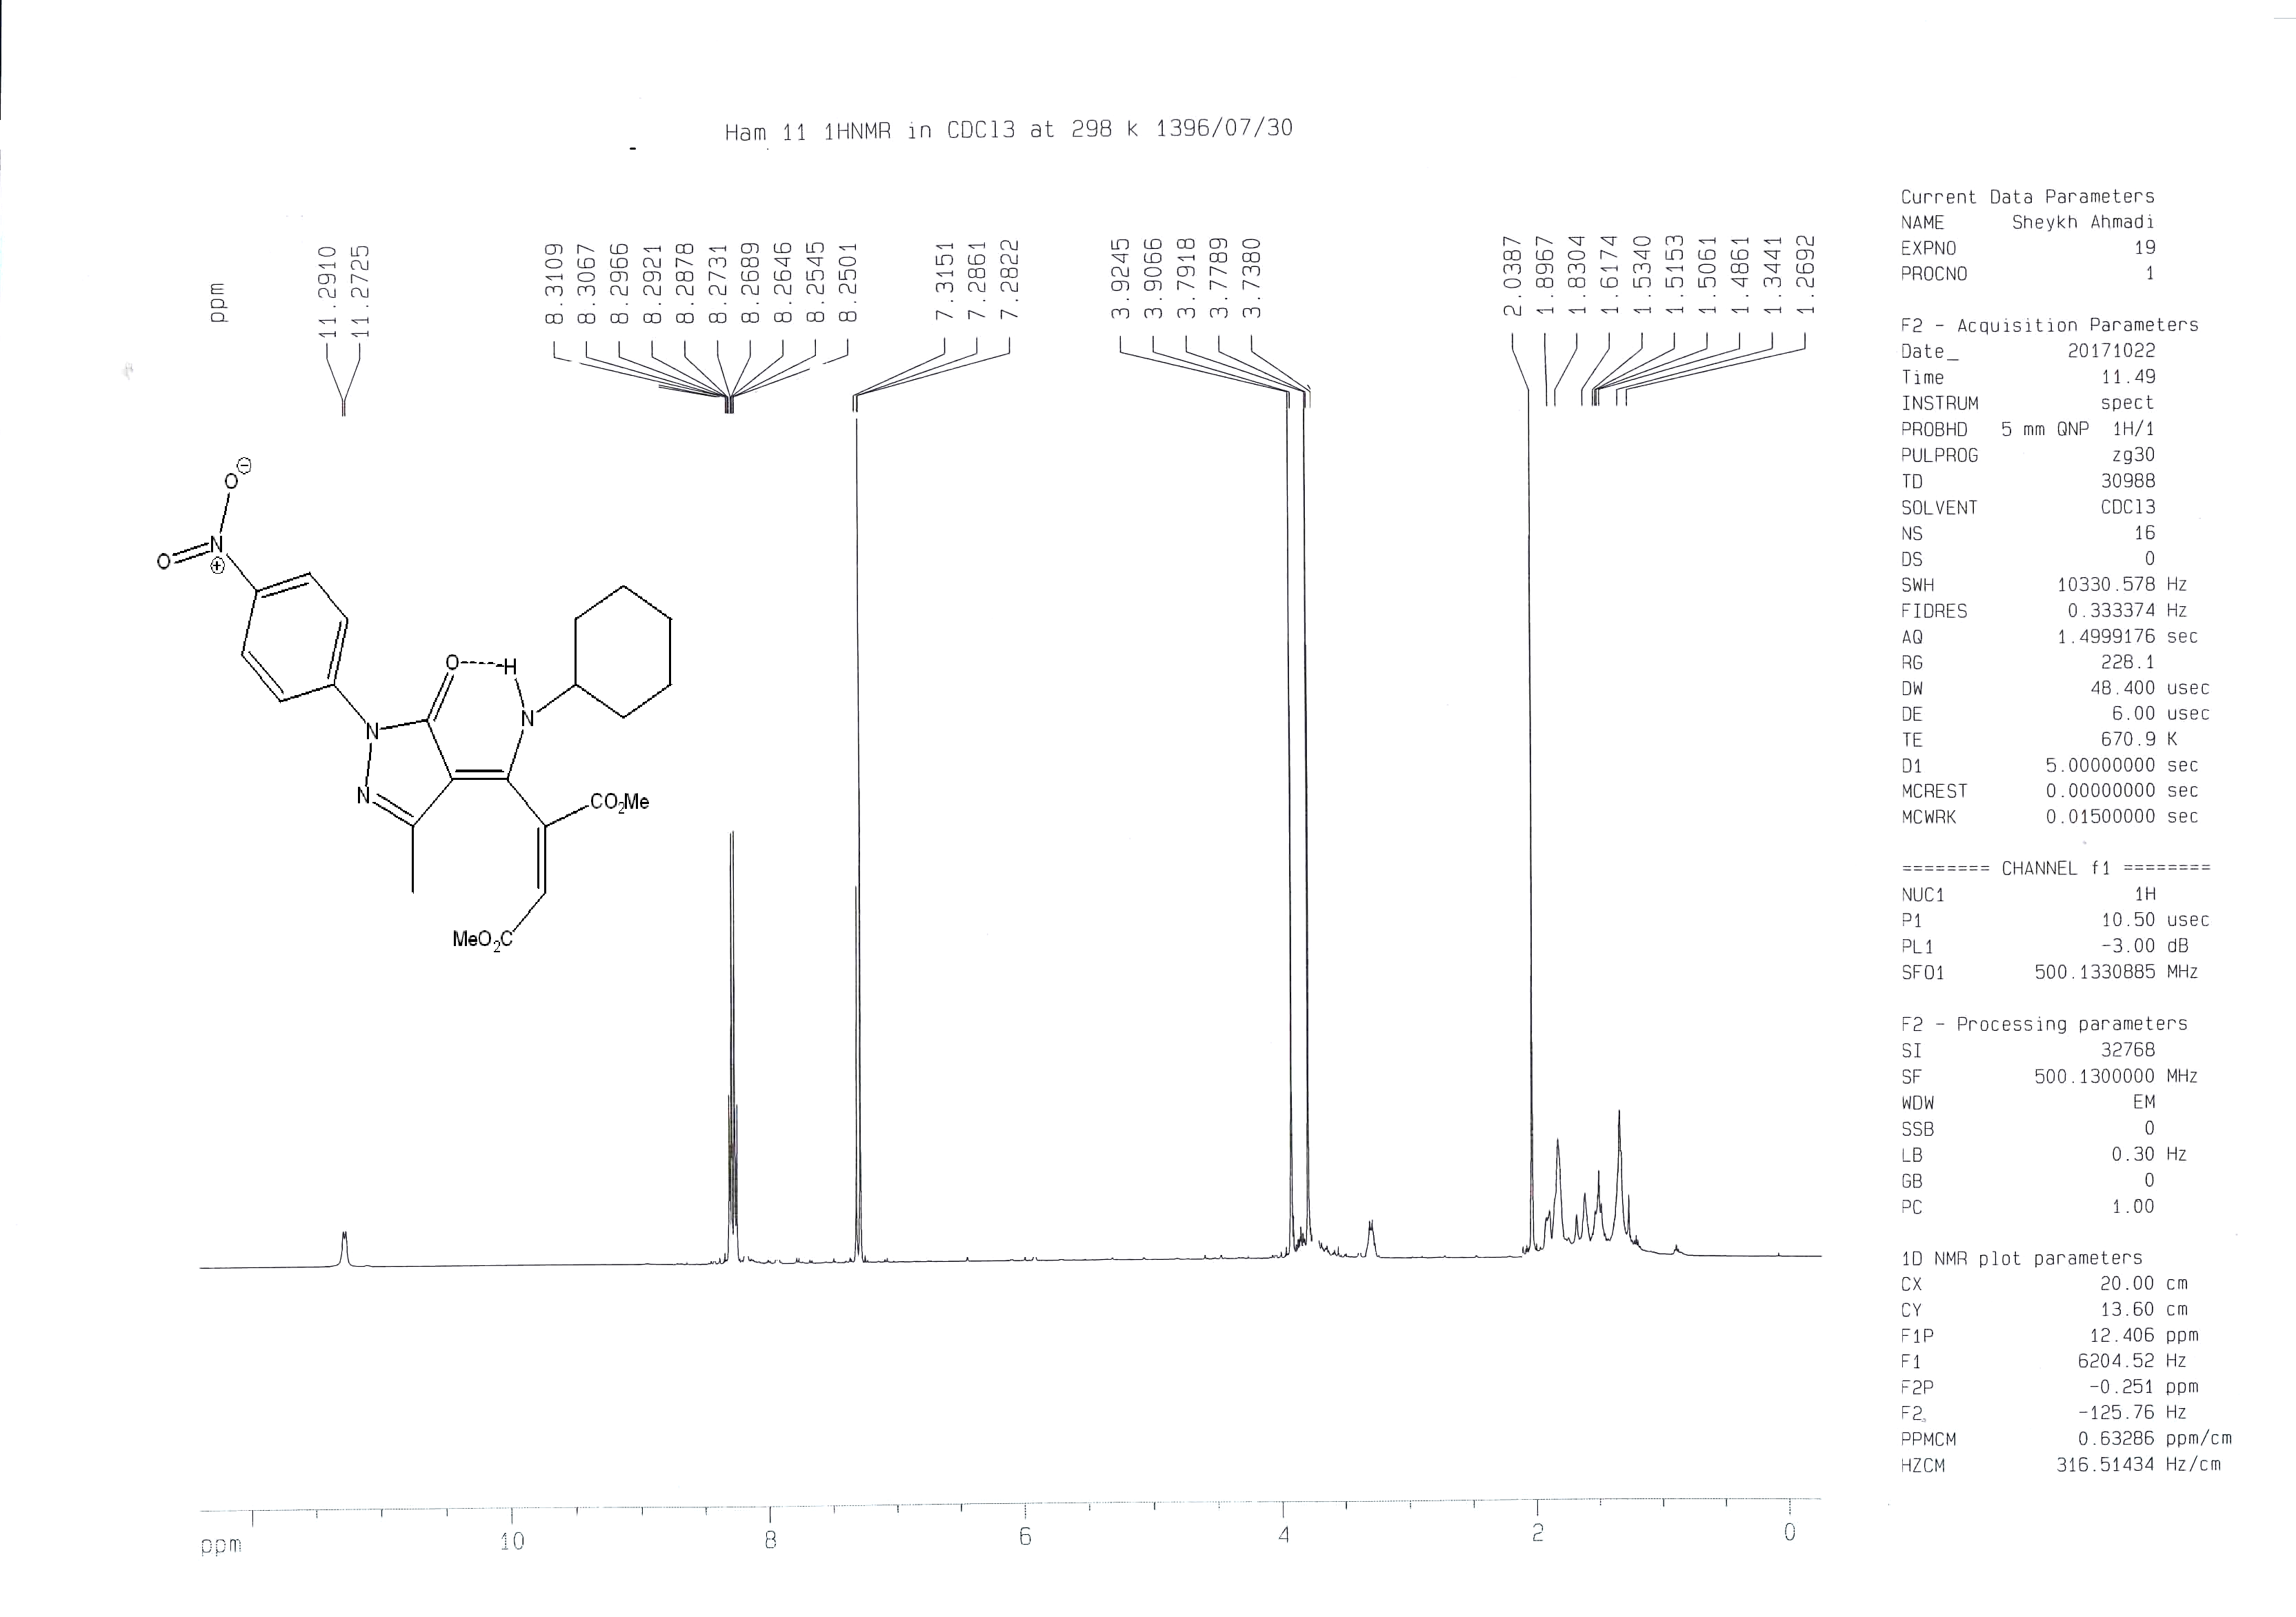


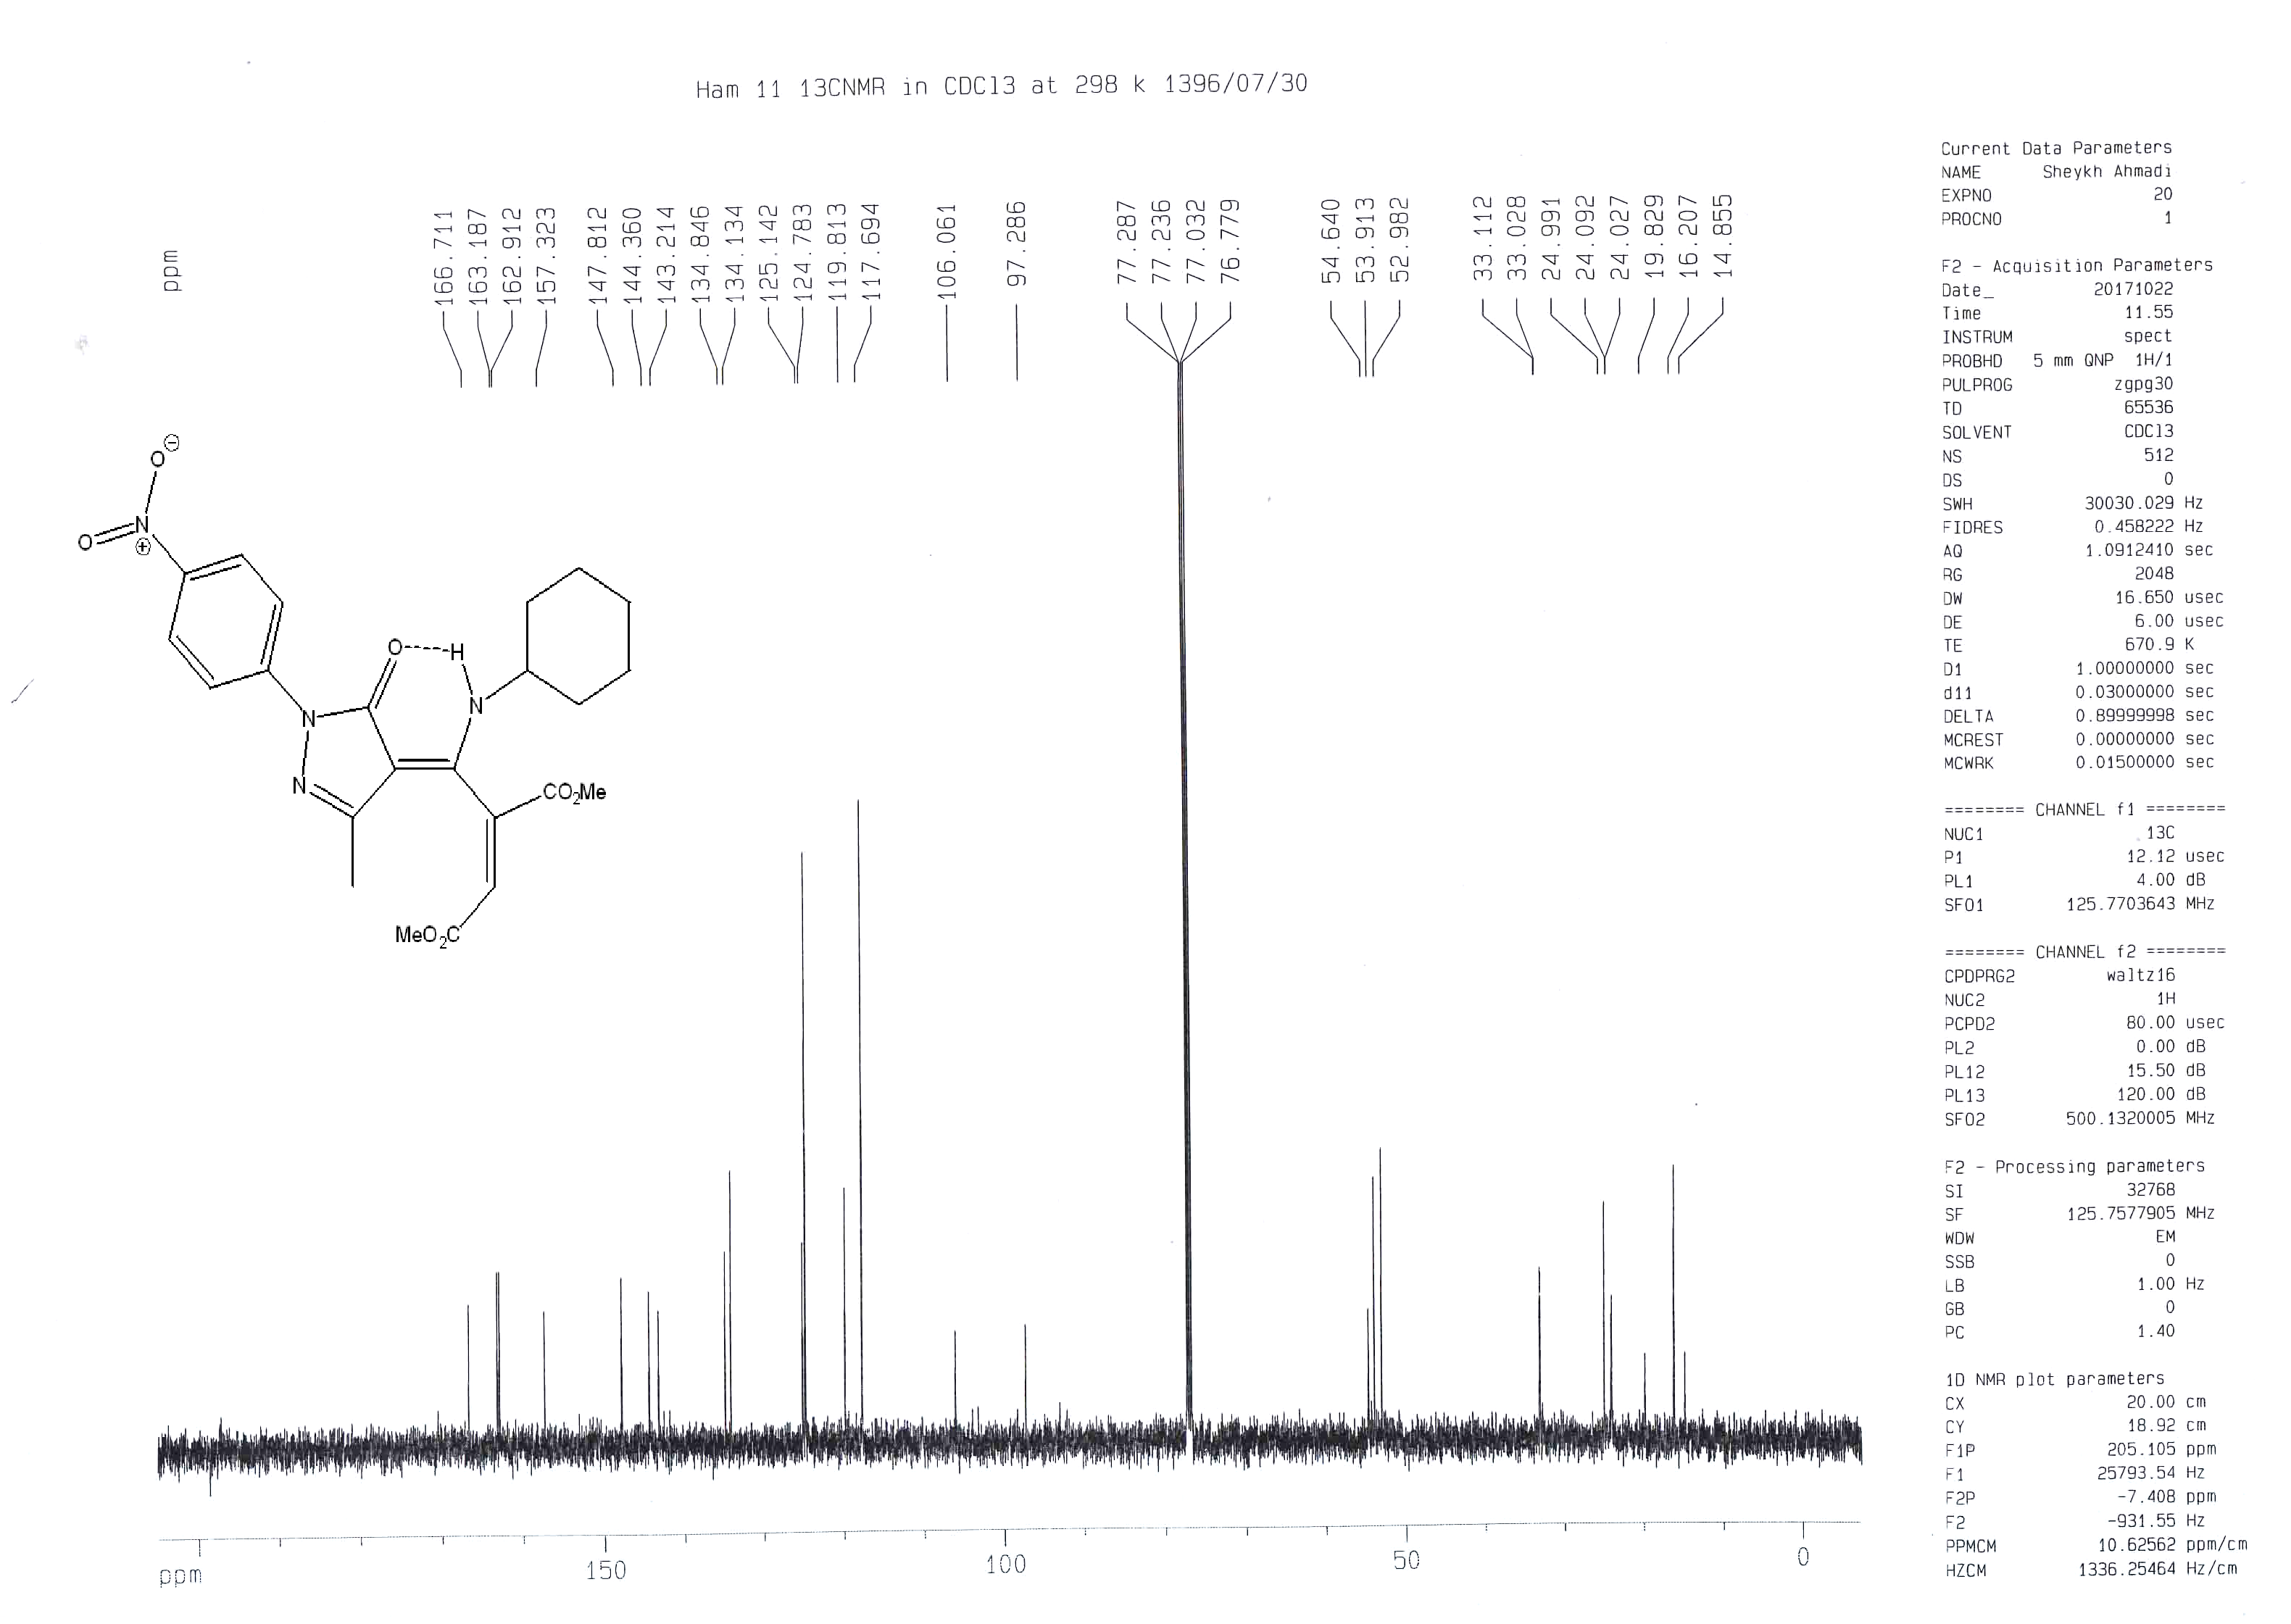


Diethyl 2-((Z)-(cyclohexylamino)(3-methyl-1-(4-nitrophenyl)-5-oxo-1,5-dihydro-4H-pyrazol-4-ylidene)methyl)fumarate (**5l**):


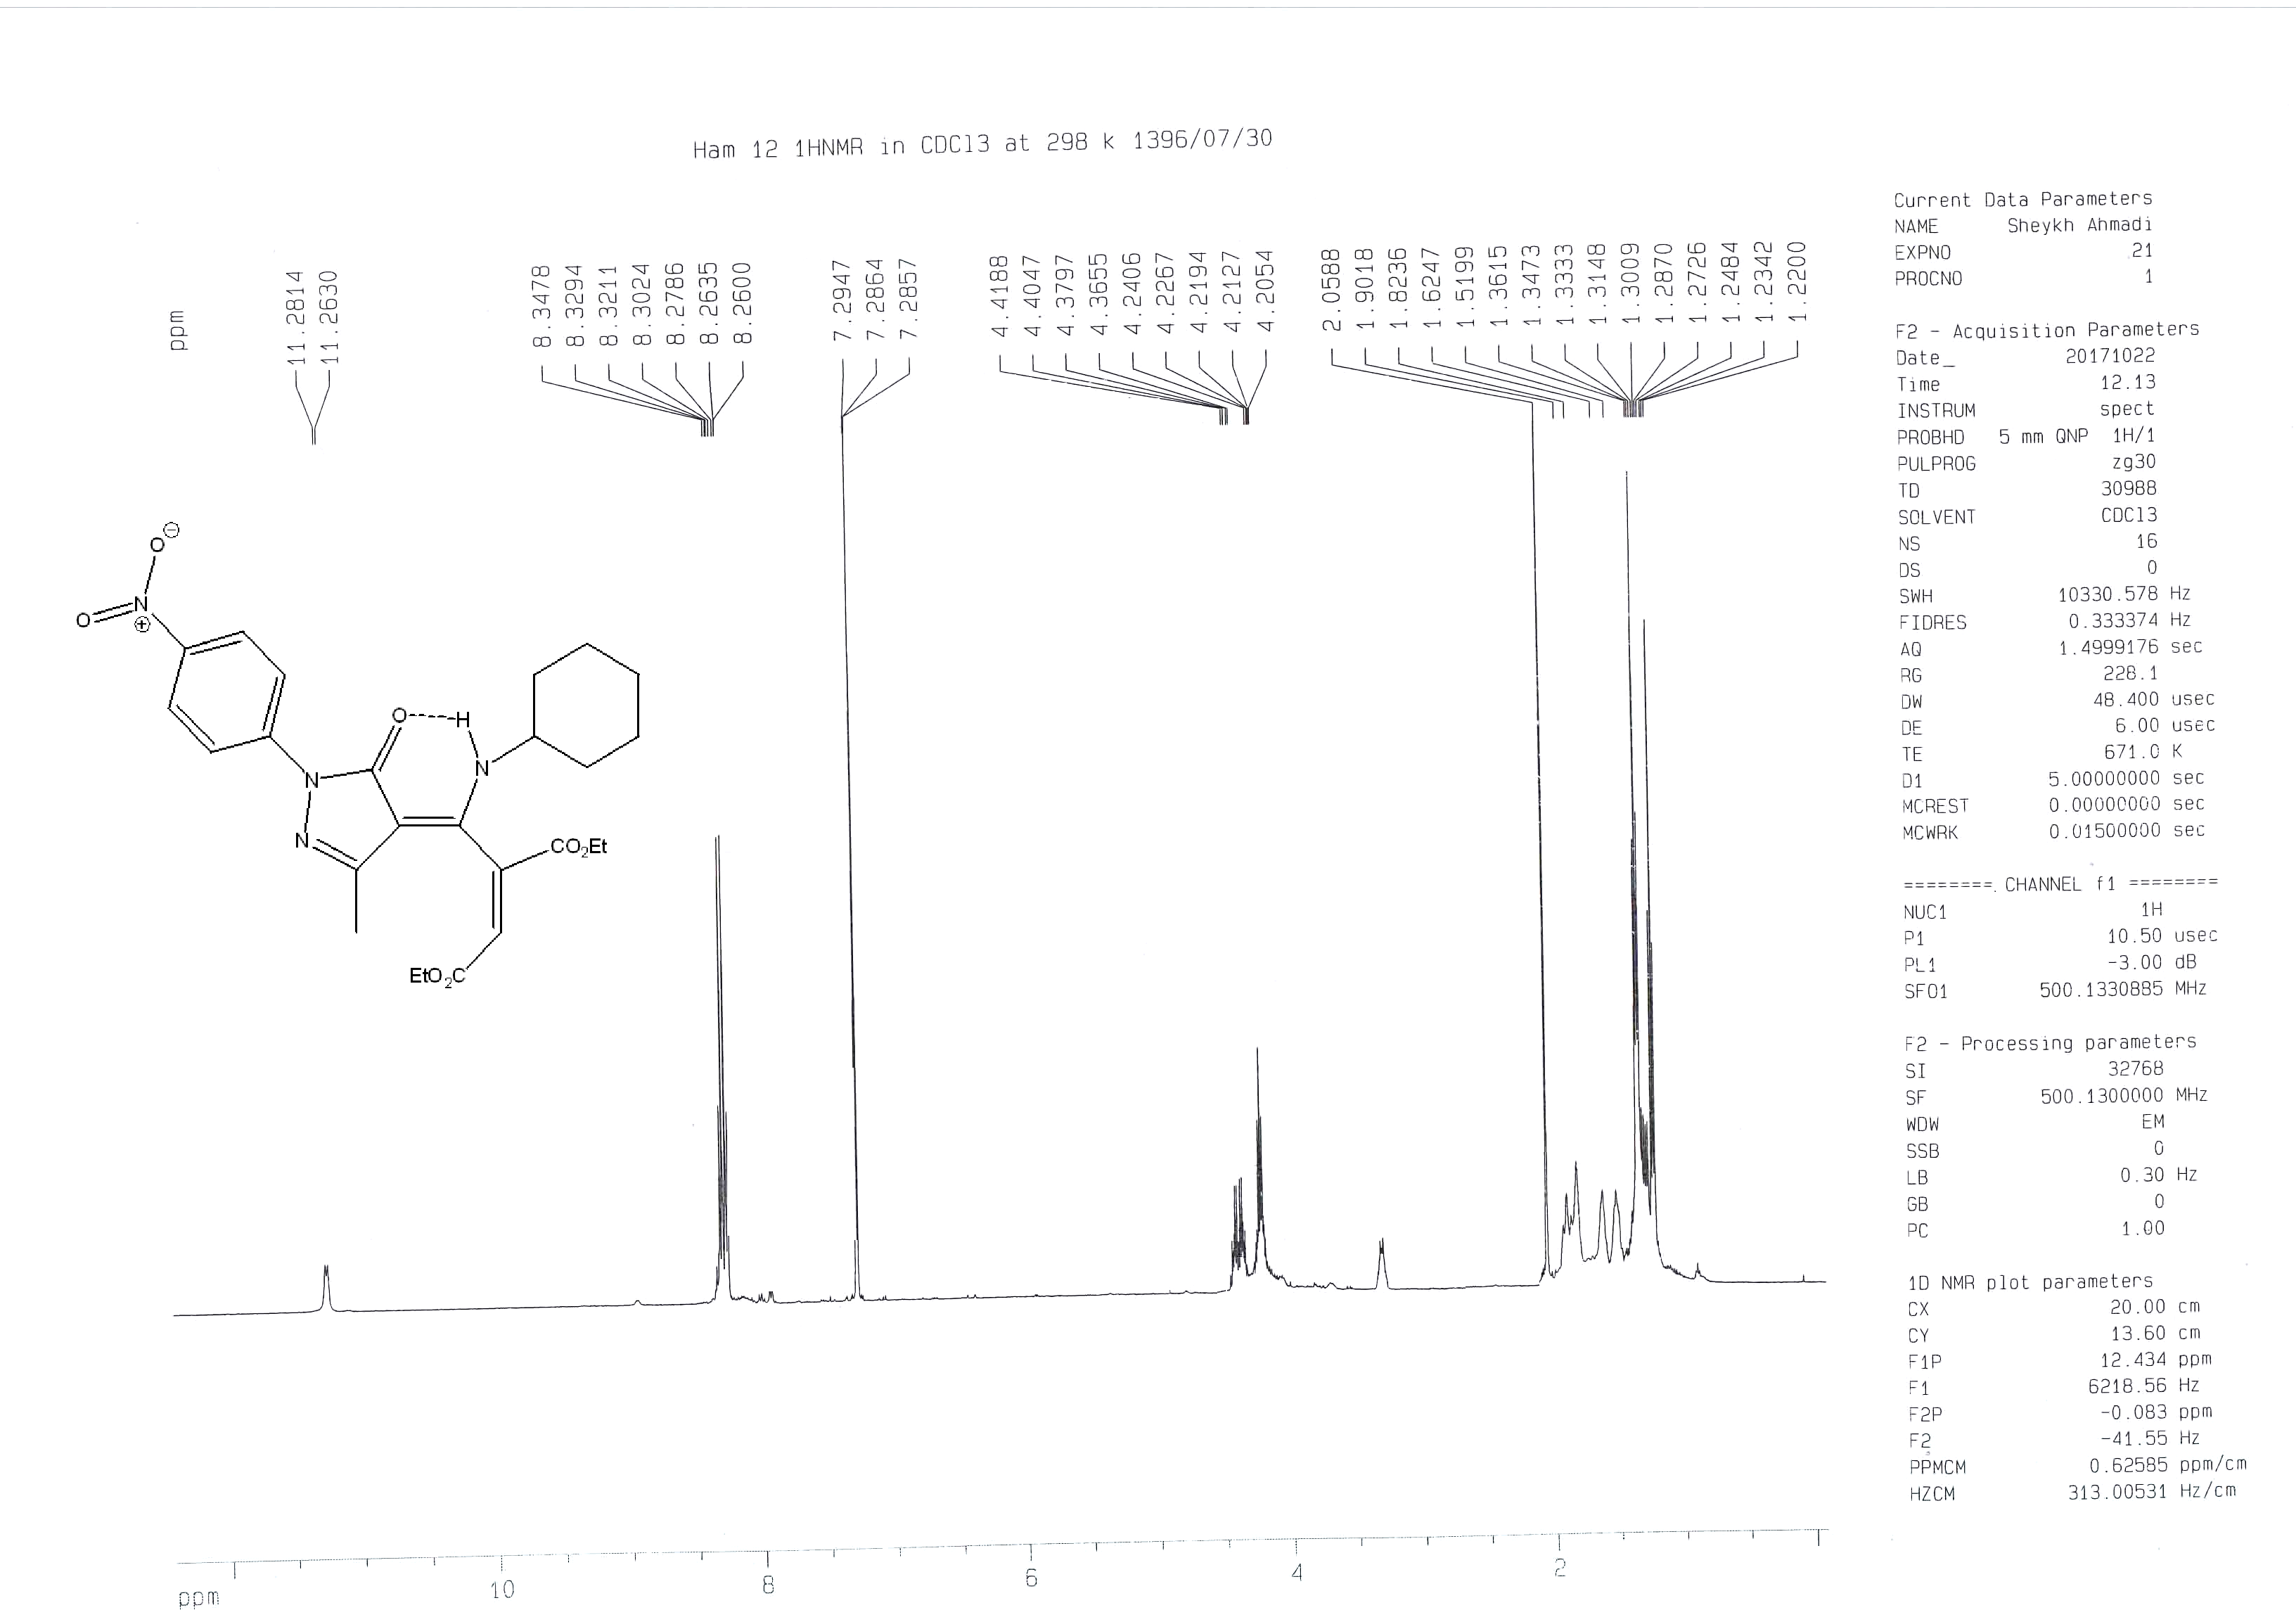


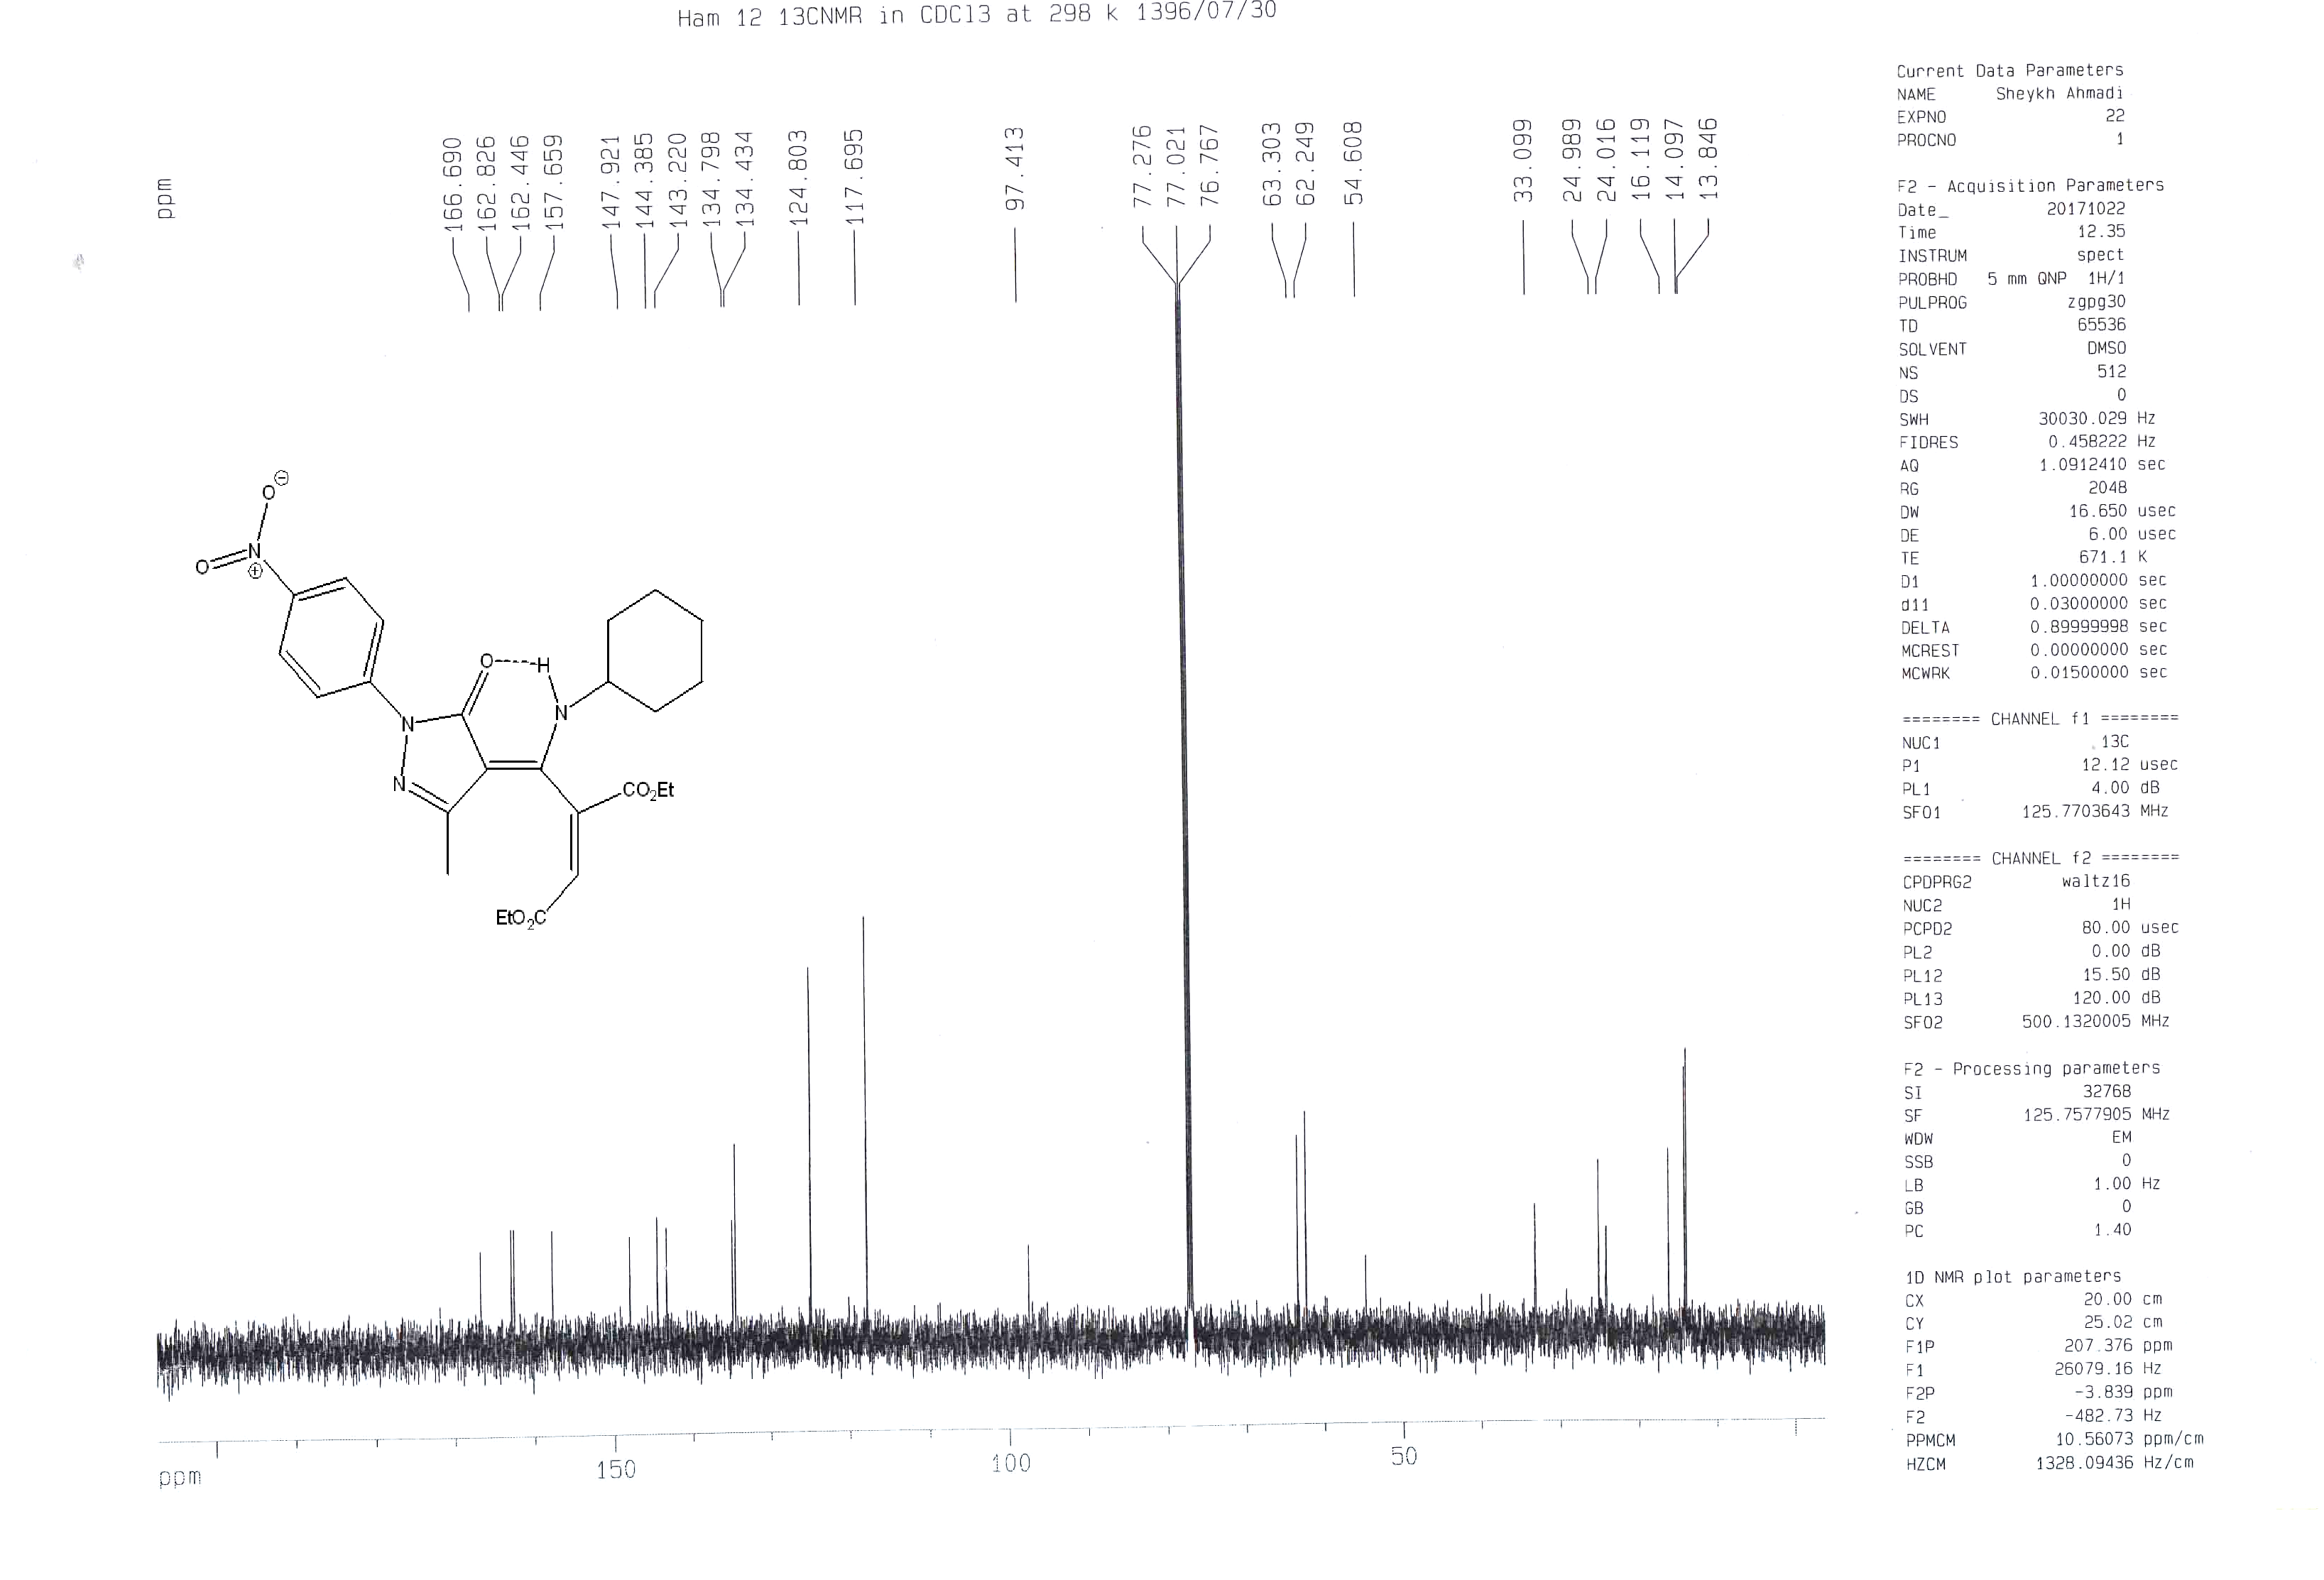

Supplement: Supplementary file 1 [file 13239011]
